# Supplementary material for: Oxygen availability is a major factor in determining the composition of microbial communities involved in methane oxidation
Source: PeerJ. 2015 Feb 24;3:e801. doi: 10.7717/peerj.801 (PMC4349146; doi:10.7717/peerj.801)
Supplement: Table S1 — OTU abundance by read counts [file peerj-03-801-s003.xls]

## Sheet: variableO2_illumina_analyses.pu
OTUId	45A 10	45B 10	45C 10	75A 10	75B 10	75C 10	150A 10	150B 10	150C 10	15A 10	15B 10	15C 10	225A 10	225B 10	225C 10	45A 16	45B 16	45C 16	75A 16	75B 16	75C 16	150A 16	150B 16	150C 16	15A 16	15B 16	15C 16	225A 16	225B 16	225C 16	domain	domain_confidence	phylum	phylum_confidence	class	class_confidence	order_	order_confidence	family	family_confidence	genus	genus_confidence	species	species_confidence	sequence
OTU_1	24014	12430	477	231	35910	9801	6183	22212	5628	239	333	5727	33223	19453	35359	8516	255	430	1870	12189	5380	4219	7319	16424	187	198	407	10191	10663	3043	Bacteria	1	Proteobacteria	1	Betaproteobacteria	1	Methylophilales	1	Methylophilaceae	1	Methylophilus	1			ATTGAACGCTGGCGGAATGCTTTACACATGCAAGTCGAACGATGAACCTTAGCTTGCTAGGgggATTAGTGGCGAACGGGTGAGTAATatatCGGAACGTACCTTGTAATGGgggATAACTAGTCGAAAGATTAGCTAATACCGCATACGCCCTGAGGgggAAAGTAGGGGATCTTCGGACCTTACGTTATAAGAGCGGCCGATATCTGATTAGCTAGTTGGTGGGGTAATGGCCTACCAAGGCGACGATCAGTAGCTGGTCTGAGAGGACGACCAGCCACACTGGAACTGAGACACGGTCCAGACTCCTACGGGAGGCAGCAGTGGGGAATTTTGGACAATGGGCGAAAGCCTGATCCAGCCATTCCGCGTGAGTGAAGAAGGCCTTCGGGTTGTAAA…
OTU_2	20188	24781	13429	22430	22253	24440	684	688	622	12923	13820	27504	722	848	2271	10137	7099	11259	2926	6410	5242	380	462	1213	5432	6266	8964	1274	660	212	Bacteria	1	Proteobacteria	1	Gammaproteobacteria	1	Methylococcales	1	Methylococcaceae	1	Methylobacter	1			ATTGAACGCTGGCGGTATGCTTAACACATGCAAGTCGAACGGTAGCAGGCCTTCGGGCGCTGACGAGTGGCGGACGGGTGAGTAACGCGTAGGAATCTGCCTCATAGTGGgggACAACGTGGGGAAACTCACGCTAATACCGCATACGCCCTACGGgggAAAGCGGgggATCTTCGGACCTCGCGCTATGAGATGAGCCTGCGTTAGATTAGCTAGTTGGTGGGGTAAAGGCCTACCAAGGCGACGATCTATAGCTGGTCTGAGAGGACGATCAGCCACACTGGGACTGAGACACGGCCCAGACTCCTACGGGAGGCAGCAGTGGGGAATATTGGACAATGGGCGAAAGCCTGATCCAGCAATACCGCGTgtgtgAAGAAGGCCTTAGGGTTGTAAAGC…
OTU_3	2417	5259	29605	790	591	8685	1698	318	105	785	2716	755	160	2953	213	752	12126	6255	11300	505	9096	1619	396	545	5873	3991	423	689	326	70	Bacteria	1	Proteobacteria	1	Betaproteobacteria	1	Methylophilales	1	Methylophilaceae	1	Methylotenera	1			ATTGAACGCTGGCGGAATGCTTTACACATGCAAGTCGAACGATGATTTCTAGCTTGCTAGAATGATTAGTGGCGAACGGGTGAGTAATGTATCGGAACGTATCCAATAATGGgggATAACTAATCGAAAGGTTGGCTAATACCGCATACGCCCTACGGgggAAAGCAGGGGATCTTCGGACCTTGCGTTAATGGAGCGGCCGATATCTGATTAGCTAGTTGGTGAGGTAAAAGCTCACCAAGGCGACGATCAGTAGCTGGTCTGAGAGGACGACCAGCCACACTGGAACTGAGACACGGTCCAGACTCCTACGGGAGGCAGCAGTGGGGAATTTTGGACAATGGGCGAAAGCCTGATCCAGCCATTCCGCGTGAGTGAAGAAGGCCTTCGGGTTGTAAA…
OTU_5	289	363	208	259	366	331	18787	10820	5755	176	201	367	12545	6948	9741	137	86	119	53	114	90	2536	1912	74	67	83	88	2604	4620	2865	Bacteria	1	Proteobacteria	1	Gammaproteobacteria	1	Methylococcales	1	Methylococcaceae	1	Methylosarcina	1			ATTGAACGCTGGCGGTATGCTTAACACATGCAAGTCGAACGGTAACAGGCCTTCGGGCGCTGACGAGTGGCGGACGGGTGCGTAACGCGTAGGAATCTGCCTATTAGTGGgggACAACGTGGGGAAACTCACGCTAATACCGCATACGCCCTACGGgggAAAGCGGgggATCTTCGGACCTCGCGCTAATAGATGAGCCTGCGTTGGATTAGCTAGTTGGTAGGGTAAAGGCCTACCAAGGCGACGATCCATAGCTGGTCTGAGAGGACGATCAGCCACACTGGGACTGAGACACGGCCCAGACTCCTACGGGAGGCAGCAGTGGGGAATATTGGACAATGGGCGAAAGCCTGATCCAGCAATACCGCGTgtgtgAAGAAGGCCTGAGGGTTGTAAAGC…
OTU_4	98	98	5834	856	361	192	72	199	72	17345	23938	487	117	85	118	56	50	66	502	262	254	34	119	103	1671	4136	2690	47	0	9	Bacteria	1	Proteobacteria	1	Betaproteobacteria	1	Methylophilales	1	Methylophilaceae	1	Methylotenera	0.95			ATTGAACGCTGGCGGAATGCTTTACACATGCAAGTCGAACGGCAGCACGGACTTCGGTCTGGTGGCGAGTGGCGAACGGGTGAGTAACATATCGGAACGTATCCAATAATGGgggATAACTAATCGAAAGGTTGGCTAATACCGCATACGCCCTACGGgggAAAGCTAGGGACCTTCGGGCCTGGCGTTAATGGAGCGGCCGATATCTGATTAGCTAGTTGGTGGGGTAAAGGCCCACCAAGGCGACGATCAGTAGCTGGTCTGAGAGGACGACCAGCCACACTGGAACTGAGACACGGTCCAGACTCCTACGGGAGGCAGCAGTGGGGAATTTTGGACAATGGGCGCAAGCCTGATCCAGCCATTCCGCGTGAGTGAAGAAGGCCTTCGGGTTGTAAA…
OTU_239	60	79	45	51	70	72	2839	2977	111	40	51	99	77	14199	59	34	21	29	14	40	25	423	185	20	8	41	26	4331	3537	17	Bacteria	1	Proteobacteria	1	Gammaproteobacteria	1	Methylococcales	1	Methylococcaceae	1	Methylosarcina	1			ATTGAACGCTGGCGGTATGCTTAACACATGCAAGTCGAACGGTAACAGGCCTTCGGGCGCTGACGAGTGGCGGACGGGTGAGTAATatatCGGAACGTACCTTGTAATGGgggATAACTAGTCGAAAGATTAGCTAATACCGCATACGCCCTACGGgggAAAGGAGGGGATCTTCGGACCTTTCGCTAATAGATGAGCCTGCGTTGGATTAGCTAGTTGGTAGGGTAAAGGCCTACCAAGGCGACGATCCATAGCTGGTCTGAGAGGACGATCAGCCACACTGGGACTGAGACACGGCCCAGACTCCTACGGGAGGCAGCAGTGGGGAATATTGGACAATGGGCGCAAGCCTGATCCAGCAATACCGCGTgtgtgAAGAAGGCCTGAGGGTTGTAAAGC…
OTU_10	808	74	1140	611	737	264	7	322	2315	1199	183	533	14	7	30	613	72	113	64	115	38	19	17	1953	231	411	50	20	0	3	Bacteria	1	Bacteroidetes	1	Flavobacteria	1	Flavobacteriales	1	Flavobacteriaceae	1	Flavobacterium	0.84			GATGAACGCTAGCGGCAGGCTTAACACATGCAAGTCGAGGGGTAGAGGAAGCTTGCTTCCTTGAGACCGGCGCACGGGTGCGTAACGCGTATGCAACCTACCTTTTACAGAGGGATAGCCCAGAGAAATTTGGATTAATACCTCATGGTAtatatCATTCGCATGTTTGATatatTAAAGTTCCAACGGTAAAAGATGGGCATGCGTCCTATTAGCTAGATGGTAAGGTAACGGCTTACCATGGCAACGATAGGTAGGGGTCCTGAGAGGGAGATCCcccACACTGGTACTGAGACACGGACCAGACTCCTACGGGAGGCAGCAGTGAGGAATATTGGACAATGGGCGCAAGCCTGATCCAGCCATGCCGCGTGCAGGAAGAAGCATCTATGGTgtgtA…
OTU_8	53	9	52	8	871	14	19	109	7821	8	11	74	21	10	9	7	5	8	4	20	9	6	1516	729	7	5	4	6	0	1	Bacteria	1	Bacteroidetes	1	Flavobacteria	1	Flavobacteriales	1	Flavobacteriaceae	1	Flavobacterium	1			GATGAACGCTAGCGGCAGGCCTAACACATGCAAGTCGAGGGGTAGAACACTTCGGTGTTTGAGACCGGCGCACGGGTGCGTAACGCGTATGCAATCTACCTTGTACAGGGGAATAGCCCAGAGAAATTTGGATTAATGCCCCATAGTAtataACCTTCGCATGTTGGTTATATTAAAGTTCCAACGGTACAAGATGAGCATGCGTCCCATTAGTTAGTTGGTAAGGTAACGGCTTACCAAGACGATGATGGGTAGGGGTCCTGAGAGGGAGATCCcccACACTGGTACTGAGACACGGACCAGACTCCTACGGGAGGCAGCAGTGAGGAATATTGGTCAATGGGCGCAAGCCTGAACCAGCCATGCCGCGTGCAGGAAGACGGTCCTATGGATTGTAAA…
OTU_7	21	9	17	25	27	21	21	17	10229	9	18	14	15	19	26	0	0	3	0	0	0	0	0	0	0	0	0	0	0	0	Bacteria	1	Proteobacteria	1	Betaproteobacteria	1	Burkholderiales	1	Oxalobacteraceae	1	Janthinobacterium	0.37			ATTGAACGCTGGCGGCATGCCTTACACATGCAAGTCGAACGGCAGCACGGAGCTTGCTCTGGTGGCGAGTGGCGAACGGGTGAGTAATatatCGGAACGTACCCAAGAGTGGgggATAACGTAGCGAAAGTTACGCTAATACCGCATACGATCTAAGGATGAAAGTGGgggACCGCAAGGCCTCATGCTCCTGGAGCGGCCGATATCTGATTAGCTAGTTGGTGAGGTAAAGGCTCACCAAGGCATCGATCAGTAGCTGGTCTGAGAGGACGACCAGCCACACTGGAACTGAGACACGGTCCAGACTCCTACGGGAGGCAGCAGTGGGGAATTTTGGACAATGGgggCAACCCTGATCCAGCAATGCCGCGTGAGTGAAGAAGGCCTTCGGGTTGTAAA…
OTU_6	15	9	9	9657	19	7	12	16	13	12	10	15	9	15	6	0	0	0	2	0	2	0	0	0	0	0	0	0	0	0	Bacteria	1	Bacteroidetes	1	Flavobacteria	1	Flavobacteriales	1	Flavobacteriaceae	1	Flavobacterium	1			GATGAACGCTAGCGGCAGGCTTAACACATGCAAGTCGAGGGGTAGAGTTAGCTTGCTAACTTGAGACCGGCGCACGGGTGCGTAACGCGTATGCAACCTACCTTGAACAGGgggATAGCCCAGAGAAATTTGGATTAATACCCCATGGTATATTAGAATGGCATCATTTTATTATTAAAGTCACAACGGTTCAAGATGGGCATGCGTCCCATTAGCTAGATGGTAAGGTAACGGCTTACCATGGCAACGATGGGTAGGGGTCCTGAGAGGGAGATCCcccACACTGGTACTGAGACACGGACCAGACTCCTACGGGAGGCAGCAGTGAGGAATATTGGTCAATGGGCGCAAGCCTGAACCAGCCATGCCGCGTGCAGGATGAAGCATCTATGGTgtgtA…
OTU_11	209	954	429	38	14	267	56	17	12	74	2422	5	10	15	22	448	412	10	26	22	31	190	22	34	1601	1123	13	35	0	5	Bacteria	1	Bacteroidetes	1	Flavobacteria	1	Flavobacteriales	1	Flavobacteriaceae	1	Flavobacterium	1			GATGAACGCTAGCGGCAGGCTTAACACATGCAAGTCGAGGGGTATAGTAGCAATACTAGAGACCGGCGCACGGGTGCGTAACGCGTATGCAATCTACCTTTTGCAGAGGGATAGCCCAGAGAAATTTGGATTAATACCTCATAGTATGTAGAGATGGCATCATTTCTACATTAAAGTCACAACGGCAAAAGATGAGCATGCGTCCCATTAGCTAGTTGGTATGGTAACGGCATACCAAGGCGACGATGGGTAGGGGTCCTGAGAGGGAGATCCcccACACTGGTACTGAGACACGGACCAGACTCCTACGGGAGGCAGCAGTGAGGAATATTGGTCAATGGGCGCAAGCCTGAACCAGCCATGCCGCGTGCAGGATGACGGTCCTATGGATTGTAAACT…
OTU_14	6	9	7	17	7	28	4	3434	10	6	14	5	11	30	2	14	15	4	10	14	11	15	1637	1211	17	23	12	702	389	3	Bacteria	1	Bacteroidetes	1	Flavobacteria	1	Flavobacteriales	1	Flavobacteriaceae	1	Flavobacterium	1			GATGAACGCTAGCGGCAGGCTTAACACATGCAAGTCGAGGGGTAGTATAGCAATatatGAGACCGGCGCACGGGTGCGTAACGCGTATGCAATCTACCTTTTACAGAGGGATAGCCCAGAGAAATTTGGATTAATACCTCATAGTATCTTCGATCCGCATGGATTGATTATTAAAGTCACAACGGTAAAAGATGAGCATGCGTCCCATTAGCTAGTTGGTAAGGTAACGGCTTACCAAGGCAACGATGGGTAGGGGTCCTGAGAGGGAGATCCcccACACTGGTACTGAGACACGGACCAGACTCCTACGGGAGGCAGCAGTGAGGAATATTGGTCAATGGGCGCAAGCCTGAACCAGCCATGCCGCGTGCAGGATGACGGTCCTATGGATTGTAAACT…
OTU_18	157	477	36	1300	87	45	6	34	20	2509	773	8	18	14	9	133	146	5	173	78	58	7	5	12	9	20	6	29	15	0	Bacteria	1	Bacteroidetes	1	Flavobacteria	1	Flavobacteriales	1	Flavobacteriaceae	1	Flavobacterium	1			GATGAACGCTAGCGGCAGGCTTAACACATGCAAGTCGAGGGGTATAGTTCTTCGGAACTAGAGACCGGCGCACGGGTGCGTAACGCGTATGCAATCTACCTTTCACAGAGGGATAGCCCAGAGAAATTTGGATTAATACCTCATAGTATAATGAGTTGGCATCAACACATTATTAAAGTCACAACGGTGAAAGATGAGCATGCGTCCCATTAGCTAGATGGTAAGGTAACGGCTTACCATGGCAACGATGGGTAGGGGTCCTGAGAGGGAGATCCcccACACTGGTACTGAGACACGGACCAGACTCCTACGGGAGGCAGCAGTGAGGAATATTGGACAATGGGCGCAAGCCTGATCCAGCCATGCCGCGTGCAGGATGACGGTCCTATGGATTGTAAA…
OTU_115	10	4	101	175	366	12	8	877	61	486	21	36	8	9	117	42	5	7	961	121	285	18	292	11	12	22	338	9	0	1	Bacteria	1	Proteobacteria	1	Betaproteobacteria	1	Methylophilales	1	Methylophilaceae	1	Methylophilus	0.45			ATTGAACGCTGGCGGAATGCTTTACACATGCAAGTCGAACGGCAGCACGGGAGCTTGCTTCTGGTGGCGAGTGGCGAACGGGTGAGTAATatatCGGAACGTATCCAATAATGGgggATAACTAGTCGAAAGATTAGCTAATACCGCATACGCCCTGAGGgggAAAGCTGGGGATCTTCGGACCTAGCGTTAATGGAGCGGCTGATATCTGATTAGCTAGTAGGTGAGGTAAAGGCTCACCTAGGCTTCGATCAGTAGCTGGTCTGAGAGGACGACCAGCCACACTGGAACTGAGACACGGTCCAGACTCCTACGGGAGGCAGCAGTGGGGAATTTTGGACAATGGGCGCAAGCCTGATCCAGCCATTCCGCGTGAGTGAAGAAGGCCTTCGGGTTGTA…
OTU_15	55	255	190	280	217	46	271	7	415	56	123	703	20	113	6	37	34	366	21	33	6	6	6	20	44	384	182	97	53	12	Bacteria	1	Proteobacteria	1	Betaproteobacteria	1	Burkholderiales	1	Comamonadaceae	1	Acidovorax	1			ATTGAACGCTGGCGGCATGCCTTACACATGCAAGTCGAACGGTAACAGGTCTTCGGATGCTGACGAGTGGCGAACGGGTGAGTAATACATCGGAACGTGCCCGAGAGTGGgggATAACGAAGCGAAAGCTTTGCTAATACCGCATACGATCTCAGGATGAAAGCAGGGGACCGCAAGGCCTTGCGCTCACGGAGCGGCCGATGGCAGATTAGGTAGTTGGTGGGATAAAAGCTTACCAAGCCGACGATCTGTAGCTGGTCTGAGAGGACGACCAGCCACACTGGGACTGAGACACGGCCCAGACTCCTACGGGAGGCAGCAGTGGGGAATTTTGGACAATGGGCGCAAGCCTGATCCAGCCATGCCGCGTGCAGGATGAAGGCCTTCGGGTTGTAAACT…
OTU_24	33	5	5	12	67	16	35	144	74	9	9	25	609	915	353	21	3	68	4	10	3	137	154	145	3	0	20	69	173	271	Bacteria	1	Proteobacteria	1	Betaproteobacteria	1	Burkholderiales	1	Comamonadaceae	1	Pelomonas	1			ATTGAACGCTGGCGGCATGCCTTACACATGCAAGTCGAACGGTAACAGGTTAAGCTGACGAGTGGCGAACGGGTGAGTAATGTATCGGAACGTGCCCAGTCGTGGgggATAACTGCTCGAAAGAGCAGCTAATACCGCATACGACCTGAGGGTGAAAGCGGgggATCGCAAGACCTCGcgcgATTGGAGCGGCCGATATCAGATTAGGTAGTTGGTGGGGTAAAGGCTCACCAAGCCAACGATCTGTAGCTGGTCTGAGAGGACGACCAGCCACACTGGGACTGAGACACGGCCCAGACTCCTACGGGAGGCAGCAGTGGGGAATTTTGGACAATGGACGCAAGTCTGATCCAGCCATGCCGCGTGCGGGAAGAAGGCCTTCGGGTTGTAAACCGCTTT…
OTU_113	6	5	10	11	6	11	4	1808	327	12	10	6	336	131	257	1	0	0	2	3	0	1	1	61	3	3	1	155	102	62	Bacteria	1	Bacteroidetes	1	Flavobacteria	1	Flavobacteriales	1	Flavobacteriaceae	1	Flavobacterium	1			ATTGAACGCTGGCGGCAGGCTTAACACATGCAAGTCGAGGGGTATATGTCTTCGGATATAGAGACCGGCGCACGGGTGCGTAACGCGTATGCAATCTACCTTTTACAGGGGAATAGCCCAGAGAAATTTGGATTAATGCCCCATAGTATTATAGAATGGCATCATTTTATAATTAAAGTCACAACGGTAAAAGATGAGCATGCGTCCCATTAGTTAGTTGGTAAGGTAACGGCTTACCAAGACAATGATGGGTAGGGGTCCTGAGAGGGAGATCCcccACACTGGTACTGAGACACGGACCAGACTCCTACGGGAGGCAGCAGTGAGGAATATTGGACAATGGGCGCAAGCCTGATCCAGCCATGCCGCGTGCAGGAAGACGGTCCTATGGATTGTAAA…
OTU_102	9	8	1168	9	220	218	2	4	8	189	75	336	3	4	5	10	2	89	102	8	312	5	9	14	18	27	200	9	0	0	Bacteria	1	Bacteroidetes	1	Flavobacteria	1	Flavobacteriales	1	Flavobacteriaceae	1	Flavobacterium	0.9			GATGAACGCTAGCGGCAGGCTTAACACATGCAAGTCGAGGGGTAGAGGAAGCTTGCTTCCTTGAGACCGGCGCACGGGTGCGTAACGCGTATGCAACCTACCTTTTACAGAGGGATAGCCCAGAGAAATTTGGATTAATACCTCATAGTGTTGTTGAATGGCATCATTTGACAACTAAAGTTCCAACGGTAAAAGATGGGCATGCGTCCTATTAGCTAGTTGGTGTGGTAACGGCACACCAAGGCTACGATAGGTAGGGGTCCTGAGAGGGAGATCCcccACACTGGTACTGAGACACGGACCAGACTCCTACGGGAGGCAGCAGTGAGGAATATTGGACAATGGGCGCAAGCCTGATCCAGCCATGCCGCGTGCAGGAAGAAGCATCTATGGTgtgtA…
OTU_9	3	6	2674	3	113	12	5	2	6	0	1	1	3	4	1	0	0	0	0	0	5	0	0	0	0	0	0	0	0	0	Bacteria	1	Bacteroidetes	1	Flavobacteria	0.51	Flavobacteriales	0.51	Flavobacteriaceae	0.5	Marixanthomonas	0.19			GATGAACGCTAGCGGCAGGCTTAATACATGCAAGTCGAGGGGCAGCAGGAATAGCAATATTTGCTGGCGACCGGCGCACGGGTGCGTAACACGTATACAATCTGCCTTTAACAGGgggATAGCCCGGAGAAATCCGGATTAATACCCCATAATAGAAGTCTCGGCATCGAGATTttttGAAAGCTCCGGCGGTTAAAGATGAGTATGCGTCTGATTAGCTAGTTGGTGAGGTAACGGCTCACCAAGGCGACGATCAGTAGGGGATCTGAGAGGATTAACCcccACACGGATACTGAGACACGGATCCGACTCCTACGGGAGGCAGCAGTAAGGAATATTGGACAATGCCCGCAAGGGTGATCCAGCCATGCCGCGTGCAGGAAGACGGCCCTATGGGTT…
OTU_12	7	10	45	2284	11	1	6	5	3	2	4	7	7	6	7	1	0	0	29	1	11	1	0	1	0	2	2	0	0	0	Bacteria	1	Proteobacteria	1	Betaproteobacteria	1	Rhodocyclales	1	Rhodocyclaceae	1	Ferribacterium	0.77			ATTGAACGCTGGCGGCATGCCTTACACATGCAAGTCGAACGGCAGCACGGGAGCAATCCTGGTGGCGAGTGGCGAACGGGTGAGTAATatatCGGAACGTACCTTTCAGTGGgggATAACGTAGCGAAAGTTACGCTAATACCGCATATTCTGTGAGCAGGAAAGCAGGGGATCGCAAGACCTTGCGCTGATTGAGCGGCCGATATCAGATTAGCTAGTTGGTGAGGTAAAGGCTCACCAAGGCGACGATCTGTAGCGGGTCTGAGAGGATGATCCGCCACACTGGAACTGAGACACGGTCCAGACTCCTACGGGAGGCAGCAGTGGGGAATTTTGGACAATGGgggCAACCCTGATCCAGCCATGCCGCGTGAGTGAAGAAGGCCTTCGGGTTGTAAA…
OTU_19	22	73	565	131	55	73	47	4	86	155	356	194	14	7	46	53	14	8	21	57	64	184	3	19	60	92	7	2	0	2	Bacteria	1	Proteobacteria	1	Betaproteobacteria	1	Burkholderiales	1	Comamonadaceae	1	Curvibacter	0.39			ATTGAACGCTGGCGGCATGCCTTACACATGCAAGTCGAACGGCAGCACGGGAGCAATCCTGGTGGCGAGTGGCGAACGGGTGAGTAATatatCGGAACGTGCCCAGTCGTGGgggATAACGTAGCGAAAGCTACGCTAATACCGCATACGATCTATGGATGAAAGCGGgggATCGCAAGACCTCGcgcgATTGGAGCGGCCGATATCAGATTAGCTAGTTGGTGGGGTAAAAGCCCACCAAGGCGACGATCTGTAGCTGGTCTGAGAGGACGACCAGCCACACTGGAACTGAGACACGGTCCAGACTCCTACGGGAGGCAGCAGTGGGGAATTTTGGACAATGGGCGAAAGCCTGATCCAGCAATGCCGCGTGCAGGACGAAGGCCTTCGGGTTGTAAA…
OTU_121	4	4	3	13	266	973	6	20	76	17	10	2	207	7	35	0	0	0	19	0	20	1	1	2	13	36	0	6	6	2	Bacteria	1	Bacteroidetes	1	Flavobacteria	1	Flavobacteriales	1	Flavobacteriaceae	1	Flavobacterium	1			GATGAACGCTAGCGGCAGGCTTAACACATGCAAGTCGAGGGGTATTGGTTTTCGGACCAAGAGACCGGCGCACGGGTGCGTAACGCGTATGCAATCTACCTTTCACAGAGGGATAGCCCAGAGAAATTTGGATTAATACCTCATAGTATGTATGAATGGCATCATTTATACATTAAAGTCACAACGGTGAAAGATGTGCATGCGTCCCATTAGCTAGTTGGTAAGGTAACGGCTTACCAAGGCTACGATGGGTAGGGGTCCTGAGAGGGAGATCCcccACACTGGTACTGAGACACGGACCAGACTCCTACGGGAGGCAGCAGTGAGGAATATTGGACAATGGGCGCAAGCCTGATCCAGCCATGCCGCGTGCAGGATGACGGTCCTATGGATTGTAAA…
OTU_35	3	1	6	6	10	27	3	9	11	3	8	2	782	421	4	2	1	0	5	1	4	0	3	2	2	3	2	193	125	1	Bacteria	1	Bacteroidetes	1	Flavobacteria	1	Flavobacteriales	1	Flavobacteriaceae	1	Flavobacterium	1			GATGAACGCTAGCGGCAGGCTTAACACATGCAAGTCGAGGGGTATTGGTTTTCGGACCAAGAGACCGGCGCACGGGTGCGTAACGCGTATGCAATCTACCTTTTACAGAGGGATAGCCCAGAGAAATTTGGATTAATACCTCATAGCATAGCAGCTTCGCATGAAGCCACTATTAAAGTCACAACGGTAAAAGATGAGCATGCGTCCCATTAGCTAGTTGGTAAGGTAACGGCTTACCAAGGCTACGATGGGTAGGGGTCCTGAGAGGGAGATCCcccACACTGGTACTGAGACACGGACCAGACTCCTACGGGAGGCAGCAGTGAGGAATATTGGACAATGGGCGCAAGCCTGATCCAGCCATGCCGCGTGCAGGATGACGGTCCTATGGATTGTAAA…
OTU_106	2	5	9	9	28	5	7	3	11	5	3	2	1249	2	76	0	0	0	0	0	1	2	1	0	2	1	0	0	41	77	Bacteria	1	Bacteroidetes	1	Flavobacteria	1	Flavobacteriales	1	Flavobacteriaceae	1	Flavobacterium	0.91			GATGAACGCTCGCGGCAGGCTTAACACATGCAAGTCGAGGGGTAGGTTACTTCGGTAACTGAGACCGGCGCACGGGTGCGTAACGCGTATACAATCTACCTTTTACAGAGGGATAGCCCAGAGAAATTTGGATTAATACCTCATAGTATTTTCGGATGGCATCATTTGATTATTAAAGTTCCAACGGTAAAAGATGAGTATGCGTCCCATTAGCTAGATGGTAAGGTAACGGCTTACCATGGCTACGATGGGTAGGGGTCCTGAGAGGGAGATCCcccACACTGGTACTGAGACACGGACCAGACTCCTACGGGAGGCAGCAGTGAGGAATATTGGACAATGGGCGCAAGCCTGATCCAGCCATGCCGCGTGCAGGAAGAAGGTCCTATGGATTGTAAA…
OTU_13	1	2	207	3	121	46	1039	2	1	0	0	1	2	2	3	0	0	0	0	0	0	1	0	0	0	0	0	0	0	0	Bacteria	1	Bacteroidetes	1	Flavobacteria	0.53	Flavobacteriales	0.53	Flavobacteriaceae	0.52	Sandarakinotalea	0.26			GATGAACGCTAGCGGCAGGCTTAATACATGCAAGTCGAGGGGCAGCACGAATAGCAATATTTGGTGGCGACCGGCGCACGGGTGCGTAACACGTATACAACCTACCTATAACAGGgggATAGCCTTTCGAAAGagagaTTAATACCCCGTAATAAATTTTGTGGCATCACAGGATTTTGAAAGCTCCGGCGGTTATAGATGGGTATGCGTCTGATTAGCTAGTTGGTGAGGTAATGGCTCACCAAGGCGACGATCAGTAGGGGATCTGAGAGGACTAACCcccACACTGGTACTGAGACACGGACCAGACTCCTACGGGAGGCAGCAGTAAGGAATATTGGTCAATGGAGGCAACTCTGAACCAGCCATGCCGCGTGCAGGATGACGGCCCTATGGGTT…
OTU_16	78	3	111	265	2	7	1	3	2	134	179	2	2	3	2	64	96	1	129	20	62	0	1	6	51	98	1	1	0	0	Bacteria	1	Proteobacteria	1	Betaproteobacteria	1	Rhodocyclales	1	Rhodocyclaceae	1	Sulfuritalea	1			ATTGAACGCTGGCGGAATGCTTTACACATGCAAGTCGAGCGGCAGCGCGGgggCAACCCTGGCGGCGAGCGGCGAACGGGTGAGTAATGTATCGGAACGTACCCAGTCGTGGgggATAACTATCCGAAAGGATAGCTAATACCGCATACGTCCTGAGGGAGAAAGCGGgggACCGTAAGGCCTCGcgcgATTGGAGCGGCCGATATCGGATTAGCTAGTTGGTGAGGTAAAGGCTCACCAAGGCGACGATCCGTAGCTGGTCTGAGAGGACGACCAGCCACACTGGAACTGAGACACGGTCCAGACTCCTACGGGAGGCAGCAGTGGGGAATTTTGGACAATGGgggCAACCCTGATCCAGCCATTCCGCGTGAGTGAAGAAGGCCTTCGGGTTGTAAA…
OTU_31	4	1	0	2	176	999	1	0	2	2	1	3	1	0	1	2	0	1	1	45	0	0	0	0	0	0	0	1	0	0	Bacteria	1	Bacteroidetes	1	Sphingobacteria	0.92	Sphingobacteriales	0.92	Sphingobacteriaceae	0.87	Solitalea	0.78			GATGAACGCTAGCGGCAGGCCTAATACATGCAAGTCGAACGGGATCAGGGAGCTTGCTCCCTGTGAGAGTGGCGCACGGGTGCGTAACACGTATGCAACCTACCTTCAACTGGgggATAGCCTTCCGAAAGGGAGATTAATACCGCATAAAATAATTGAACGGCATCGTTTAATTATCAAACGTCAGGGTTGAAGATGGGCATGCGTCCGATTAGTTTGTTGGTGAGGTAACGGCTCACCAAGACTACGATCGGTAGGGGATCTGAGAGGATGACCccccACACTGGTACTGAGACACGGACCAGACTCCTACGGGAGGCAGCAGTAAGGAATATTGGTCAATGGACGCAAGTCTGAACCAGCCATGCCGCGTGCAGGAAGACGGTCCTCTGGATTGTA…
OTU_26	3	3	1	1	7	8	8	72	3	0	5	3	3	50	556	1	2	2	2	6	2	17	39	132	2	1	0	54	33	3	Bacteria	1	Proteobacteria	1	Betaproteobacteria	1	Burkholderiales	1	Burkholderiales_incertae_sedis	1	Ideonella	0.89			ATTGAACGCTGGCGGCATGCCTTACACATGCAAGTCGAACGGTAACGCGGGGTAACCTGGCGACGAGTGGCGAACGGGTGAGTAATGCATCGGAACGTGCCCAGTAGTGGgggATAGCCCGGCGAAAGCCGGATTAATACCGCATACGACCTACGGGTGAAAGGgggggATCGCAAGACCTCTCGCTATTGGAGCGGCCGATGTCAGATTAGGTAGTTGGTGGGGTAAAAGCCTACCAAGCCGACGATCTGTAGCTGGTCTGAGAGGACGACCAGCCACACTGGGACTGAGACACGGCCCAGACTCCTACGGGAGGCAGCAGTGGGGAATTTTGGACAATGGGCGCAAGCCTGATCCAGCCATGCCGCGTGCGGGAAGAAGGCCTTCGGGTTGTAAACC…
OTU_34	131	143	32	2	3	1	1	0	5	5	12	9	1	0	1	462	9	9	2	2	3	30	3	6	7	36	27	4	0	0	Bacteria	1	Bacteroidetes	1	Flavobacteria	1	Flavobacteriales	1	Flavobacteriaceae	1	Flavobacterium	1			GATGAACGCTAGCGGCAGGCCTAACACATGCAAGTCGAGGGGTAGAGGAAGCTTGCTTCCTTGAGACCGGCGCACGGGTGCGTAACGCGTATGCAATCTACCTTATACAGAGGGATAGCCCAGAGAAATTTGGATTAATACCTCATAGTATTATGAAATCGCATGGTTTTATAATTAAAGTTCCAACGGTATAAGATGAGCATGCGTCCCATTAGTTAGTTGGTAAGGTAACGGCTTACCAAGACAATGATGGGTAGGGGTCCTGAGAGGGAGATCCcccACACTGGTACTGAGACACGGACCAGACTCCTACGGGAGGCAGCAGTGAGGAATATTGGTCAATGGACGCAAGTCTGAACCAGCCATGCCGCGTGCAGGATGACGGTCCTATGGATTGTA…
OTU_23	183	4	248	2	22	2	0	0	3	64	8	259	0	0	1	32	1	2	20	5	5	0	0	0	2	4	8	2	0	0	Bacteria	1	Bacteroidetes	1	Sphingobacteria	1	Sphingobacteriales	1	Chitinophagaceae	1	Sediminibacterium	0.64			GATGAACGCTAGCGGCAGGCTTAATACATGCAAGTCGTGGGGCAGCGCAGGTAGCAATACTGGGCGGCGACCGGCAAACGGGTGCGGAACACGTACACAACCTTCCGAGAAGTGGGGAATAGCCCAGAGAAATTTGGATTAATACCCCGTAACATAACGATGTGGCATCACATTGTTATTATAGCTTCGGCGCTTCTTGATGGGTGTGCGGCTGATTAGATAGTTGGCGGGGTAACGGCCCACCAAGTCTACGATCAGTAGCTGATGTGAGAGCATGATCAGCCACACGGGCACTGAGACACGGGCCCGACTCCTACGGGAGGCAGCAGTAAGGAATATTGGTCAATGGACGCAAGTCTGAACCAGCCATGCCGCGTGAAGGATTAAGGTCCTCTGGAT…
OTU_105	1	0	2	1	8	26	1	24	788	2	0	1	10	0	3	0	0	0	0	1	0	0	0	6	0	0	0	0	0	0	Bacteria	1	Bacteroidetes	1	Flavobacteria	1	Flavobacteriales	1	Flavobacteriaceae	1	Flavobacterium	1			GATGAACGCTAGCGGCAGGCTTAACACATGCAAGTCGAGGGGTATAGTTCTTCGGAGCTAGAGACCGGCGCACGGGTGCGTAACGCGTATGCAATCTACCTTTCACAGAGGGATAGCCCAGAGAAATTTGGATTAATACCTCATAGTATTACGACCCGGCATCGGGATGTAATTAAAGTCACAACGGTGAAAGATGTGCATGCGTCCCATTAGCTAGTTGGTAAGGTAACGGCTTACCAAGGCAACGATGGGTAGGGGTCCTGAGAGGGAGATCCcccACACTGGTACTGAGACACGGACCAGACTCCTACGGGAGGCAGCAGTGAGGAATATTGGTCAATGGGCGCAAGCCTGAACCAGCCATGCCGCGTGCAGGATGACGGTCCTATGGATTGTAAA…
OTU_20	9	278	1	4	220	0	2	3	0	0	1	0	1	0	0	22	170	1	0	22	0	0	1	3	6	30	0	0	0	0	Bacteria	1	Bacteroidetes	1	Sphingobacteria	1	Sphingobacteriales	1	Chitinophagaceae	1	Sediminibacterium	1			GATGAACGCTAGCGGCAGGCTTAATACATGCAAGTCGAGGGGTAGCATGATTGTAGCAATACAGTTGATGACGACCGGCAAACGGGTGCGGAACACGTACACAACCTTCCTACAAGTGGGGAATAGCCCAGAGAAATTTGGATTAATACCCCGTAACATAGCGATGTGGCATCACATTGCTATTATAGCTTCGGCGCTTGTTGATGGGTGTGCGGCTGATTAGATAGTTGGCGGGGTAACGGCCCACCAAGTCTACGATCAGTAGCTGATGTGAGAGCATGATCAGCCACACGGGCACTGAGACACGGGCCCGACTCCTACGGGAGGCAGCAGTAAGGAATATTGGACAATGGACGCAAGTCTGATCCAGCCATGCCGCGTGAAGGATTAAGGTCCTCT…
OTU_60	12	1	4	6	3	4	246	42	5	5	2	3	1	1	97	7	0	0	0	4	0	312	4	10	2	1	1	0	0	0	Bacteria	1	Bacteroidetes	1	Flavobacteria	1	Flavobacteriales	1	Flavobacteriaceae	1	Flavobacterium	1			GATGAACGCTAGCGGCAGGCCTAACACATGCAAGTCGAGGGGTAGTTACTTTCGGGTAATGAGACCGGCGCACGGGTGCGTAACGCGTATGCAATCTACCTTTTACAGGGGAATAGCCCAGAGAAATTTGGATTAATGCCCCATAATatatGTTtttCGCATGTTAGACATATTAAAGTTCCAACGGTAAAAGATGAGCATGCGTCCCATTAGTTAGTTGGTAAGGTAACGGCTTACCAAGACGATGATGGGTAGGGGTCCTGAGAGGGAGATCCcccACACTGGTACTGAGACACGGACCAGACTCCTACGGGAGGCAGCAGTGAGGAATATTGGACAATGGGCGCAAGCCTGATCCAGCCATGCCGCGTGCAGGAAGACGGTCCTATGGATTGTAAA…
OTU_17	0	0	0	0	0	0	0	0	0	0	0	0	0	0	0	2	0	1	0	1	0	735	0	2	0	2	2	2	0	0	Bacteria	1	Bacteroidetes	0.99	Flavobacteria	0.68	Flavobacteriales	0.68	Flavobacteriaceae	0.62	Zhouia	0.11			GATTAACGCTAGCGGCAGGCATAATACATGCAAGTTGAACGAGATAAGTTGTAGCAATACGGCTTTGAAAGTGGCGCACGGGTGCGTAACACGTATGCAACCTACCTTTTACCGGGGAATAGCCTCTCGAAAGagagaTTAATACCCCATAACATATAGTATAGGCATCTATATTATATTAAAGTTCAGGCGGTAAAAGATGGGCATGCGGTTGATTAGTTAGTTGGTGAGGTAATGGCTCACCAAGACTTCGATCAATAGGgggTCTGAGAGGATGTCCccccACACTGGTACTGAGACACGGACCAGACTCCTACGGGAGGCAGCAGTAGGGAATATTGGACAATGGGCGCAAGCCTGATCCAGCCATGCCGCGTGCAGGATGAAGGCCCTATGGGT…
OTU_124	13	0	46	3	4	91	1	2	3	240	138	137	3	0	2	8	0	0	2	1	0	0	2	7	3	25	0	2	0	0	Bacteria	1	Bacteroidetes	1	Flavobacteria	1	Flavobacteriales	1	Flavobacteriaceae	0.98	Flavobacterium	0.7			GATGAACGCTAGCGGCAGGCCTAACACATGCAAGTCGAGGGGTAGGGTAGCAATACCTGAGACCGGCGCACGGGTGCGTAACGCGTATGCAACCTACCTTTTACAGGGGAATAGCCCAGAGAAATTTGGATTAATGCCCCATGGTAtataAGAATCGCATGGTTtttATATTAAAGTTCCAACGGTAAAAGATGGGCATGCGTCCTATTAGCTAGATGGTAAGGTAACGGCTTACCATGGCTACGATAGGTAGGGGTCCTGAGAGGGAGATCCcccACACTGGTACTGAGACACGGACCAGACTCCTACGGGAGGCAGCAGTGAGGAATATTGGACAATGGGCGCAAGCCTGATCCAGCCATGCCGCGTGCAGGAAGACGCATCTATGGTgtgtAAACT…
OTU_81	0	1	3	1	136	5	4	1	3	1	1	1	87	35	0	0	0	0	4	6	1	2	1	1	1	1	0	208	141	67	Bacteria	1	Bacteroidetes	1	Flavobacteria	1	Flavobacteriales	1	Flavobacteriaceae	1	Flavobacterium	1			GATGAACGCTAGCGGCAGGCTTAACACATGCAAGTCGAGGGGTATTTATCTTCGGATAGagagaCCGGCGCACGGGTGCGTAACGCGTATGCAATCTACCTTTTGCAGAGGGATAGCCCAGAGAAATTTGGATTAATACCTCATAGTATAGTGAGCTGGCATCAGCGCACTATTAAAGTCACAACGGCAAAAGATGTGCATGCGTCCCATTAGCTAGTTGGTAAGGTAACGGCTTACCAAGGCAACGATGGGTAGGGGTCCTGAGAGGGAGATCCcccACACTGGTACTGAGACACGGACCAGACTCCTACGGGAGGCAGCAGTGAGGAATATTGGACAATGGGCGCAAGCCTGATCCAGCCATGCCGCGTGCAGGATGACGGTCCTATGGATTGTAAA…
OTU_42	86	1	108	28	7	101	0	3	0	2	59	20	0	0	1	34	0	0	8	3	11	0	0	1	19	8	0	0	0	0	Bacteria	1	Proteobacteria	1	Betaproteobacteria	1	Burkholderiales	1	Comamonadaceae	1	Polaromonas	1			ATTGAACGCTGGCGGCATGCCTTACACATGCAAGTCGAACGGTAGAGTAGCAATACTCGAGAGTGGCGAACGGGTGAGTAATatatCGGAACGTGCCCAGTCGTGGgggATAACGTAGAGAAATTTACGCTAATACCGCATACGATCTAAGGATGAAAGCGGgggATTCGCAAGAACCTCGcgcgATTGGAGCGGCTGATATCAGATTAGGTTGTTGGTGAGGTAAAAGCTCACCAAGCCGACGATCTGTAGCTGGTTTGAgagaACGACCAGCCACACTGGGACTGAGACACGGCCCAGACTCCTACGGGAGGCAGCAGTGGGGAATTTTGGACAATGGGCGAAAGCCTGATCCAGCAATGCCGCGTGCAGGAAGAAGGCCTTCGGGTTGTAAACTGC…
OTU_25	0	0	0	0	26	352	0	0	0	15	1	0	0	0	0	0	0	0	0	0	0	0	0	0	0	0	0	0	0	0	Bacteria	1	Bacteroidetes	0.98	Flavobacteria	0.64	Flavobacteriales	0.64	Flavobacteriaceae	0.61	Galbibacter	0.25			GATTAACGCTAGCGGCAGGCATAATACATGCAAGTTGAGCGAGATAAGTTGTAGCAATACGGCTTTGAAAGCGGCGCACGGGTGCGTAACACGTATGCAACCTACCTTTTACTAAGGAATAGCCTCTCGAAAGagagaTTAATACCTTATAACATGTTTTGAAGGCATCTTCAGAACCTTAAAGCTCCGGCGGTAAAAGATGGGCATGCGGTTGATTAGCTAGTTGGTGAGGTAATGGCTCACCAAGGCTTCGATCAATAGGgggTCTGAGAGGATGTCCccccACACTGGTACTGAGACACGGACCAGACTCCTACGGGAGGCAGCAGTAGGGAATATTGGACAATGGGCGCAAGCCTGATCCAGCCATGCCGCGTGCAGGATGAAGGCCCTATGGGT…
OTU_174	34	3	296	15	2	2	0	6	0	2	1	1	0	1	1	1	0	0	0	0	1	0	0	0	4	2	2	0	0	0	Bacteria	1	Bacteroidetes	1	Flavobacteria	1	Flavobacteriales	1	Flavobacteriaceae	1	Flavobacterium	1			ATTGAACGCTGGCGGTATGCTTAACACATGCAAGTCGAGGGGTATAGTAGCAATACTAGAGACCGGCGCACGGGTGCGTAACGCGTATGCAATCTACCTTTCACAGAGGGATAGCCCAGAGAAATTTGGATTAATACCTCATAGTATTATAGTATGGCATCATATTATAATTAAAGTCACAACGGTGAAAGATGAGCATGCGTCCCATTAGCTAGTTGGTATGGTAACGGCATACCAAGGCGACGATGGGTAGGGGTCCTGAGAGGGAGATCCcccACACTGGTACTGAGACACGGACCAGACTCCTACGGGAGGCAGCAGTGAGGAATATTGGACAATGGGCGCAAGCCTGATCCAGCCATGCCGCGTGCAGGATGACGGTCCTATGGATTGTAAACT…
OTU_30	1	0	1	0	0	0	13	0	33	0	1	5	272	1	16	0	1	4	0	0	0	2	0	0	0	0	7	1	1	1	Bacteria	1	Proteobacteria	1	Gammaproteobacteria	1	Pseudomonadales	1	Pseudomonadaceae	1	Pseudomonas	1			ATTGAACGCTGGCGGCAGGCCTAACACATGCAAGTCGAGCGGTAGagagaAGCTTGCTTCTCTTGAGAGCGGCGGACGGGTGAGTAATGCCTAGGAATCTGCCTGGTAGTGGgggATAACGCTCGGAAACGGACGCTAATACCGCATACGTCCTACGGGAGAAAGCAGGGGACCTTCGGGCCTTGCGCTATCAGATGAGCCTAGGTCGGATTAGCTAGTTGGTGAGGTAATGGCTCACCAAGGCGACGATCCGTAACTGGTCTGAGAGGATGATCAGTCACACTGGAACTGAGACACGGTCCAGACTCCTACGGGAGGCAGCAGTGGGGAATATTGGACAATGGGCGAAAGCCTGATCCAGCCATGCCGCGTgtgtgAAGAAGGTCTTCGGATTGTAAA…
OTU_194	0	0	0	0	0	0	0	0	0	0	0	0	0	0	0	0	3	1	0	3	1	316	4	1	0	2	4	3	0	0	Bacteria	1	Bacteroidetes	1	Flavobacteria	1	Flavobacteriales	1	Flavobacteriaceae	1	Flavobacterium	0.94			ATTGAACGCTGGCGGAATGCTTAACACATGCAAGTCGAGGGGTAGTTGTCTTCGGACAATGAGACCGGCGCACGGGTGCGTAACGCGTATGCAATCTACCTTTTGCAGGGGAATAGCCCAGAGAAATTTGGATTAATGCCCCATAGTATAATGAGTTGGCATCAACTTATTATTAAAGTCACAACGGCAAAAGATGTGCATGCGTCCCATTAGTTAGTTGGTAAGGTAACGGCTTACCAAGACTATGATGGGTAGGGGTCCTGAGAGGGAGATCCcccACACTGGTACTGAGACACGGACCAGACTCCTACGGGAGGCAGCAGTGAGGAATATTGGACAATGGGCGCAAGCCTGATCCAGCCATGCCGCGTGCAGGAAGAAGCATCTATGGTgtgtAAA…
OTU_21	0	0	1	0	1	0	295	0	1	0	0	0	0	0	0	0	0	0	0	0	0	0	0	0	0	0	0	0	0	0	Bacteria	1	Proteobacteria	1	Deltaproteobacteria	1	Myxococcales	1	Polyangiaceae	0.97	Sorangium	0.52			AACGAACGTTAGCGGCgcgcTTAACACATGCAAGTCGCACGAGAAAGGGAGCAATCCCCGGTACAGTGGCGCACGGGTGAGTAACACGTAGGTAATCTTCCCTCGAGTGGTGGATAACCTTCCGAAAGGGAGGCTAATACAGCATAAGACCACGGGAGCGAAAGCTTCTGGGGTCAAAGCCGGCCTCTATACATAAGCTGGCGCTTGAGGATGAGCCTGCGGCCCATCAGCTAGTTGGTAGGGTAATGGCCTACCAAGGCGAAGACGGGTAGCTGGTCTGAGAGGATGATCAGCCACACTGGAACTGAGACACGGTCCAGACTCCTACGGGAGGCAGCAGTGGGGAATCTTGCGCAATGGGCGAAAGCCTGACGCAGCGACGCCGCGTGAGTGATGAAG…
OTU_27	0	0	0	0	0	0	0	3	0	0	0	0	0	0	0	0	0	2	0	1	1	2	1	280	0	0	3	1	0	0	Bacteria	1	Proteobacteria	1	Gammaproteobacteria	1	Methylococcales	1	Methylococcaceae	1	Methylomicrobium	0.64			ATTGAACGCTGGCGGTATGCTTAACACATGCAAGTCGAACGAGTAGCTACTTCGGTAGCGAGAGTGGCGGACGGGTGAGTAACGCGTAGGAATCTGCCTGTTAGTGGgggACAACGTGGGGAAACTCACGCTAATACCGCATACGCCCTATGGgggAAAGGAGGGGACGCTGGTTCTTCGGAATGAGCGCCTTTCGCTAACAGATGAGCCTGCGTGGGATTAGCTAGTTGGTAGGGTAAAGGCCTACCAAGGCGACGATCCCTAGCTGGTCTGAGAGGACGATCAGCCACACTGGGACTGAGACACGGCCCAGACTCCTACGGGAGGCAGCAGTGGGGAATATTGGACAATGGGCGCAAGCCTGATCCAGCAATACCGCGTgtgtgAAGAAGGCCTGAG…
OTU_32	15	5	23	1	14	0	1	0	0	17	0	1	1	0	0	6	0	130	0	6	0	0	2	0	2	0	1	0	4	20	Bacteria	1	Bacteroidetes	1	Sphingobacteria	1	Sphingobacteriales	1	Chitinophagaceae	1	Ferruginibacter	0.48			GATGAACGCTAGCGGCAGGCTTAATACATGCAAGTCGAGGGGCAGCACGGGTAGCAATACCTGGTGGCGACCGGCAAACGGGTGCGGAACACGTACGCAACTTTCCCAAAACTGGTGAATAGCCCTCCGAAAGGAGGATTAATACACCGTAACATAATGAAGTGGCATCACTTTATTATTATAGCTCCGGCGGTTTTGGATGGGCGTGCGCCTGATTAGGTAGTTGGCGGGGTAACGGCCCACCAAGCCTTCGATCAGTAACTGGTGTGAGAGCACGACCAGTCACACGGGCACTGAGACACGGGCCCGACTCCTACGGGAGGCAGCAGTAAGGAATATTGGTCAATGGACGCAAGTCTGAACCAGCCATGCCGCGTGAAGGATGAAGGTCCTCTGGAT…
OTU_28	30	0	0	1	0	1	0	0	0	113	0	0	0	3	1	36	32	0	0	0	1	0	0	0	1	1	0	1	0	0	Bacteria	1	Proteobacteria	1	Deltaproteobacteria	1	Bdellovibrionales	1	Bacteriovoracaceae	1	Bacteriovorax	1			AACGAACGCTGGCGGCGTGCCTAACACATGCAAGTCGAACGTGAAAGTCCTTCGGGATGAGTAAAGTGGCGCACGGGTGAGTAACACGTAGGTGACCTACCGTTTAGAGGGGAATAACCAGAAGAAATTTTGGCTAATGCCGCATACGAAGAGCAAATCTAAGAGTAGCTCTTGAAAGAATGCCTCTGTATATGCATTCACTAATCGATGGGCCTGCGGGACATTAGCTAGTTGGTGGGGTAATGGCCTACCAAGGCTACGATGTCTATCCGGTCTGAGAGGATGATCGGACacacTGGAACTGAGACACGGTCCAGACTCCTACGGGAGGCAGCAGTGGGGAATATTGCGCAATGGgggAAACCCTGACGCAGCAACGCCGCGTGAGTGAGGAAGGAC…
OTU_41	17	50	1	3	100	0	1	0	2	2	0	0	0	1	0	2	0	0	0	0	0	0	0	0	0	0	0	0	0	0	Bacteria	1	Bacteroidetes	1	Sphingobacteria	1	Sphingobacteriales	1	Chitinophagaceae	1	Sediminibacterium	0.96			GATGAACGCTAGCGGCAGGCTTAATACATGCAAGTCGAGGGGCAGCATGAGTAGCAATACTTGATGGCGACCGGCAAACGGGTGCGGAACACGTACACAACCTTCCTTTAAGTGGGGAATAGCCCAGAGAAATTTGGATTAATACCCCGTAACATATAGATGTGGCATCACAATTATATTATAGGTTTACCGCTTAAAGATGGGTGTGCGGCTGATTAGATAGTTGGCGGGGTAATGGCCCACCAAGTCTACGATCAGTAGCTGATGTGAGAGCATGATCAGCCACACGGGCACTGAGACACGGGCCCGACTCCTACGGGAGGCAGCAGTAAGGAATATTGGACAATGGACGCAAGTCTGATCCAGCCATGCCGCGTGAAGGATTAAGGTCCTCTGGAT…
OTU_39	2	1	14	1	6	0	1	34	0	17	0	1	0	0	0	2	0	1	0	0	1	0	1	60	0	0	0	0	0	0	Bacteria	1	Bacteroidetes	1	Sphingobacteria	1	Sphingobacteriales	1	Chitinophagaceae	1	Sediminibacterium	0.58			GATGAACGCTAGCGGCAGGCTTAATACATGCAAGTCGAGGGACAGCACAGGTAGCAATACTGGGTGGTAACCGGCAAACGGGTGCGGAACACGTACACAACCTTCCTTTAAGTGGgggATAGCCCAGAGAAATTTGGATTAATACCCCGTAACATAGTGAACTGGCATCAGTTTATTATTATAGCTACGGCGCTTAATGATGGGTGTGCGGCTGATTAGATAGTTGGCGGGGTAACGGCCCACCAAGTCTACGATCAGTAGCTGATGTGAGAGCATGATCAGCCACACGGGCACTGAGACACGGGCCCGACTCCTACGGGAGGCAGCAGTAAGGAATATTGGTCAATGGACGCAAGTCTGAACCAGCCATGCCGCGTGAAGGATTAAGGTCCTCTGGAT…
OTU_38	1	1	0	3	0	27	0	0	0	18	36	19	0	1	0	0	7	0	3	1	3	0	0	0	1	2	0	1	0	1	Bacteria	1	Verrucomicrobia	1	Opitutae	1	Opitutales	1	Opitutaceae	1	Opitutus	1			AATGAACGCTGGCGGCGTGGTTAAGACATGCAAGTCGAACGGTTtttCAAATGTAGCAATACATTTGAAAAGCAGTGGCGAACGGGTGCGTAACACGTGAACAATCTACCATTTAGTGTGGAATAGCTCGGCGAAAGCCGGATTAATACCACATGTGGTTGTCtctctcCTGAGAGGCATACTAAAGTCGGGGACCGCAAGGCCTGACGCTAATTGAGGAGTTCGCGGCCTATCAGCTAGTTGGCGAGGTAACGGCTCACCAAGGCTAAGACGGGTAGCTGATCTGAGAGGATGATCAGCCACACTGGAACTGAGACACGGTCCAGACACCTACGGGTGGCAGCAGTTTCGAATCATTCACAATGGGCGAAAGCCTGATGGTGCGACGCCGCGTGAGGG…
OTU_36	0	0	0	0	2	0	0	0	71	0	0	0	30	1	0	0	0	0	0	0	0	0	2	0	0	0	0	2	5	0	Bacteria	1	Verrucomicrobia	1	Verrucomicrobiae	1	Verrucomicrobiales	1	Verrucomicrobiaceae	1	Prosthecobacter	1			AACGAACGCTGGCGGCGTGGATAAGACATGCAAGTCGAACGGGATCATCAGAGTAGCAATATGATGATGGTCTAGTGGCGAACGGGTGCGTAACACGTGGATACATTCCGGGAAGCGGgggATAGCCCAGGGAAACTTGGATTAATACCGCATGTGGTCGAAAGACTAAAGGCAGGGACCGCAAGGCCTGCCACTTCCCGATTGGTCCGCGGCCTATCAGCTAGTTGGCGGGGTAAAAGCCCACCAAGGCTACGACGGGTAGCTGGTCTTAGAGGACGACCAGCCACACTGGAACTGAGACACGGTCCAGACACCTACGGGTGGCAGCAGTCGAGAATCTTTCACAATGGgggCAACCCTGATGGAGCGACGCCGCGTGGAGGATAAGGTCTTCGGATT…
OTU_44	0	48	0	38	0	0	0	0	0	22	0	1	1	1	0	0	2	0	0	0	0	0	0	0	0	0	0	0	0	0	Bacteria	1	Bacteroidetes	0.99	Bacteroidia	0.19	Bacteroidales	0.19	Porphyromonadaceae	0.1	Tannerella	0.1			GATGAACGCTAGCGGCGGGCCTAATACATGCAAGTCGAACGAGATTATTGGTAGCAATACTGATATGAAAGTGGCGCACGGGTGCGTAACACGTATGTAACCTACCTTTAACTGGGGAATAGCTTCGAGAAATCGAAATTAATACCCCATAACATTTAGAAAAGGCATCTTTTCTTTATCAAAGTTCAGGCGGTTAAAGATGGACATGCGGTGCATTAGCTTGTTGGTGAGGTAATGGCTCACCAAGGCTACGATGCATAGGgggTCTGAGAGGATGATCCcccACACTGGTACTGAGACACGGACCAGACTCCTACGGGAGGCAGCAGTAGGGAATATTGGGCAATGGACGAAAGTCTGACCCAGCCACGCCGCGTGAAGGATGACTGCCCTATGGGT…
OTU_40	1	46	0	0	0	0	1	0	0	0	0	0	0	0	0	0	45	0	0	0	0	1	0	0	0	0	0	0	0	0	Bacteria	1	Bacteroidetes	1	Sphingobacteria	0.65	Sphingobacteriales	0.65	Sphingobacteriaceae	0.57	Solitalea	0.36			GATGAACGCTAGCGGCAGGCTTAATACATGCAAGTCGAGGGGCAGCACGGTTAGCAATAACTGGTGGCGACCGGCGCACGGGTGCGTAACACGTATACAACCTACCTAAAACAGGgggATAGCCTTTCGAAAGagagaTTAATACCCCGTAATAAATTGAACGGCATCGTTTGATTTTGAAAGCTCCGGCGGTTTTAGATGGGTATGCGTTTGATTAGCTAGTTGGTGGTGTAATGGACCACCAAGGCTACGATCAATAGGGGATCTGAGAGGACTAACCcccACACTGGTACTGAGACACGGACCAGACTCCTACGGGAGGCAGCAGTAAGGAATATTGGTCAATGGAGGAAACTCTGAACCAGCCATGCCGCGTGCAGGAAGACGGCCCTATGGGTT…
OTU_221	1	0	0	1	0	53	0	10	3	1	1	0	2	3	1	0	0	0	0	0	0	0	0	0	0	0	0	0	0	0	Bacteria	1	Bacteroidetes	1	Flavobacteria	1	Flavobacteriales	1	Flavobacteriaceae	1	Flavobacterium	1			GATGAACGCTAGCGGCAGGCTTAACACATGCAAGTCGAGGGGTATAGGTTTTCGGACCTAGAGACCGGCGCACGGGTGCGTAACGCGTATGCAATCTACCTTTCACAAAGGGATAGCCCAGAGAAATTTGGATTAATACCTTATAGTAtataGAGATGGCATCATTtttATATTAAAGATTTATCGGTGAAAGATGAGCATGCGTCCCATTAGCTAGTTGGTAAGGTAACGGCTTACCAAGGCAACGATGGGTAGGGGTCCTGAGAGGGAGATCCcccACACTGGTACTGAGACACGGACCAGACTCCTACGGGAGGCAGCAGTGAGGAATATTGGACAATGGGCGCAAGCCTGATCCAGCCATGCCGCGTGCAGGATGACGGTCCTATGGATTGTAAA…
OTU_75	0	0	0	5	0	0	1	0	32	0	0	2	21	6	0	0	0	0	0	0	0	0	0	0	0	0	0	3	3	0	Bacteria	1	Proteobacteria	1	Gammaproteobacteria	1	Pseudomonadales	1	Pseudomonadaceae	1	Pseudomonas	1			ATTGAACGCTGGCGGCAGGCCTAACACATGCAAGTCGAGCGGATGAGAAGAGCTTGCTCTTCGATTCAGCGGCGGACGGGTGAGTAATGCCTAGGAATCTGCCTGGTAGTGGgggACAACGTTTCGAAAGGAACGCTAATACCGCATACGTCCTACGGGAGAAAGCAGGGGACCTTCGGGCCTTGCGCTATCAGATGAGCCTAGGTCGGATTAGCTAGTTGGTGAGGTAATGGCTCACCAAGGCTACGATCCGTAACTGGTCTGAGAGGATGATCAGTCACACTGGAACTGAGACACGGTCCAGACTCCTACGGGAGGCAGCAGTGGGGAATATTGGACAATGGGCGAAAGCCTGATCCAGCCATGCCGCGTgtgtgAAGAAGGTCTTCGGATTGTAAA…
OTU_253	0	0	2	1	0	32	0	1	0	13	8	0	0	2	9	0	0	0	1	0	0	0	0	0	1	0	0	0	0	0	Bacteria	1	Bacteroidetes	1	Flavobacteria	1	Flavobacteriales	1	Flavobacteriaceae	1	Flavobacterium	1			GATGAACGCTAGCGGCAGGCTTAACACATGCAAGTCGAGGGGTATAGTAGCAATACTAGAGACCGGCGCACGGGTGCGTAACGCGTATGCAATCTACCTTTTACAGAGGGATAGCCCAGAGAAATTTGGATTAATACCTCATAGTATAGTACAATCGCATGATTGCACTATTAAAGTTACAACGGTAAAAGATGAGCATGCGTCCCATTAGCTAGTTGGTAAGGTAACGGCTTACCAAGGCGACGATGGGTAGGGGTCCTGAGAGGGAGATCCcccACACTGGTACTGAGACACGGACCAGACTCCTACGGGAGGCAGCAGTGAGGAATATTGGACAATGGGCGCAAGCCTGATCCAGCCATGCCGCGTGCAGGAAGACGGTCCTATGGATTGTAAACT…
OTU_68	0	0	0	0	0	22	0	2	0	2	1	0	0	0	0	0	0	1	8	1	29	3	0	0	0	0	0	0	0	0	Bacteria	1	Proteobacteria	1	Gammaproteobacteria	1	Methylococcales	1	Methylococcaceae	1	Methylomonas	0.99			ATTGAACGCTGGCGGTATGCTTAACACATGCAAGTCGAACGGCAGCGGgggCTTCGGCCTGCCGGCGAGTGGCGGACGGGTGAGTAATGCATAGGAATCTGCCTATTAGTGGgggATAACGTGGGGAAACTCACGCTAATACCGCATACGACCTACGGGTGAAAGCTGGGGACCTTCGGGCCTGGCGCTAATAGATGAGCCTATGTTGGATTAGCTAGTTGGTAGGGTAAAGGCCTACCAAGGCGACGATCCATAGCTGGTCTGAGAGGATGATCAGCCACACTGGGACTGAGACACGGCCCAGACTCCTACGGGAGGCAGCAGTGGGGAATATTGGACAATGGGCGAAAGCCTGATCCAGCAATACCGCGTgtgtgAAGAAGGCCTGAGGGTTGTAAA…
OTU_51	3	7	9	0	0	2	8	0	1	5	6	3	0	0	1	2	0	0	1	0	5	1	3	5	2	4	0	0	0	0	Bacteria	1	Proteobacteria	1	Alphaproteobacteria	1	Rhodobacterales	1	Rhodobacteraceae	1	Pseudorhodobacter	0.8			AATGAACGCTGGCGGCAGGCCTAACACATGCAAGTCGAACGGGTCCTTCGGGACTAGTGGCGGACGGGTGAGTAACGCGTGGGAACATACCCTTTGGTACGGAATAGCCTCGGGAAACTGAGAGTAATACCGTATGTGCCcccccAATCAAATTTCATTTGATTGGTGCTTTCAATCTTATCAAATTCCGGATGGAATTTGATGGggggggAAAGATTTATCGCCAAAGGATTGGCCCGCGTTGGATTAGGTAGTTGGTGGGGTAATGGCCTACCAAGCCGACGATCCATAGCTGGTTTGAGAGGATGATCAGCCACACTGGGACTGAGACACGGCCCAGACTCCTACGGGAGGCAGCAGTGGGGAATCTTAGACAATGGgggAAACCCTGATCTAGCC…
OTU_71	0	0	0	0	0	0	0	0	57	0	0	1	0	0	0	0	0	0	0	0	0	0	0	0	0	0	0	0	0	0	Bacteria	1	Proteobacteria	1	Gammaproteobacteria	1	Aeromonadales	1	Aeromonadaceae	1	Aeromonas	1			ATTGAACGCTGGCGGCAGGCCTAACACATGCAAGTCGAGCGGCAGCGGGAAAGTAGCTTGCTACTTTTGCCGGCGAGCGGCGGACGGGTGAGTAATGCCTGGGAAATTGCCCAGTCGAGGgggATAACAGTTGGAAACGACTGCTAATACCGCATACGCCCTACGGgggAAAGCAGGGGACCTTCGGGCCTTGCGCGATTGGATATGCCCAGGTGGGATTAGCTTGTTGGTGAGGTAATGGCTCACCAAGGCGACGATCCCTAGCTGGTCTGTGAGGATGATCAGCCACACTGGAACTGAGACACGGTCCAGACTCCTACGGGAGGCAGCAGTGGGGAATATTGCACAATGGgggAAACCCTGATGCAGCCATGCCGCGTgtgtgAAGAAGGCCTTCGG…
OTU_37	1	8	0	8	31	1	0	0	0	0	0	0	0	0	1	2	0	0	0	4	0	0	0	0	0	0	0	0	0	0	Bacteria	1	Proteobacteria	1	Deltaproteobacteria	1	Myxococcales	1	Cystobacteraceae	0.88	Hyalangium	0.8			AACGAACGCTGGCGGCGTGCCTAACACATGCAAGTCGAGCGCGAAAAGGGCAACCTGAGTAGAGCGGCGCACGGGTGCGTAACACGTGGGTAATCTGCCTTGGAGTCGAGGATAACTTTCCGAAAGGTTAGCTAATACTCGGTAAGCTTACGGAGACTTCGGTCTTTGTGAGAAAAGTAGGCCTCTATTTATAAGCTTACGCTTCGAGATGAGCCCGCGGCCCATCAGCTAGTTGGCGGTGTAACGGACCACCAAGGCAACGACGGGTAGCTGGTCTGAGAGGACGATCAGCCACACTGGAACTGAGACACGGTCCAGACTCCTACGGGAGGCAGCAGTGGGGAATTTTCCACAATGGGCGAAAGCCTGATGGAGCAACGCCGCGTgtgtgATGAAGGT…
OTU_55	1	1	0	0	0	33	0	0	0	0	0	0	0	0	0	2	0	0	3	0	5	0	0	0	0	0	0	0	0	0	Bacteria	1	Bacteroidetes	1	Sphingobacteria	1	Sphingobacteriales	1	Chitinophagaceae	1	Lacibacter	1			GATGAACGCTAGCGGCAGGCTTAATACATGCAAGTCGAGGGGCAGCAGGTTTGTAGCAATACAGATGCTGGCGACCGGCAAACGGGTGCGGAACACGTACGCAACCTTCCTTTAACTGGAAGATAGCCCACCGAAAGGTGGATTAATACTCCATAATATAACTGAATGGCATCATTTAGATATTAAAGCTCCGGCGGTTAAAGATGGGCGTGCGTCTGATTAGGTAGTTGGCGGGGTAACGGCCCACCAAGCCTGCGATCAGTAGCTGATGTGAGAGCATGATCAGCCACACGGGCACTGAGACACGGGCCCGACTCCTACGGGAGGCAGCAGTAAGGAATATTGGTCAATGGACGCAAGTCTGAACCAGCCATGCCGCGTGGAGGATGAAGGCCCTCT…
OTU_63	0	0	0	1	0	0	0	0	1	1	0	19	0	0	0	0	0	0	1	0	0	0	0	0	1	3	4	0	0	1	Bacteria	1	Proteobacteria	1	Betaproteobacteria	1	Rhodocyclales	1	Rhodocyclaceae	1	Sulfuritalea	1			ATTGAACGCTGGCGGAATGCTTTACACATGCAAGTCGAGCGGCAGCGCGGgggCAACCCTGGCGGCGAGCGGCGAACGGGTGAGTAATGTATCGGAACGTACCCTGTCGTGGgggATAACACAGCGAAAGCTGTGCTAATACCGCATACGACCTGAGGGTGAAAGCGGgggACCTGGGGTAACTTGGGCCTCGcgcgATAGGAGCGGCCGATATCGGATTAGCTAGTTGGTGAGGTAAAGGCTCACCAAGGCGACGATCCGTAGCTGGTCTGAGAGGACGACCAGCCACACTGGAACTGAGACACGGTCCAGACTCCTACGGGAGGCAGCAGTGGGGAATTTTGGACAATGGgggCAACCCTGATCCAGCCATTCCGCGTGAGTGAAGAAGGCCTTCGG…
OTU_45	0	0	0	0	0	0	28	0	0	0	0	0	0	0	0	0	0	0	0	0	0	0	0	0	0	0	0	0	0	0	Bacteria	0.99	Proteobacteria	0.57	Betaproteobacteria	0.3	Burkholderiales	0.17	Alcaligenaceae	0.03	Paenalcaligenes	0.03			AATGAACGCTTGTAACATGCTTTACACATGCAAGTCGAACGCTAAaaaaTAGATGAAAATTTATTTTGGGAGTGGCGGACGGGTGCGTAATGCTTAGAAAAGATGCCTTTAAGTTTAGTTAAATGATTtttATTCGCGAGAGTATAAATCTAAATACTGAATAAATATCTTTGTGAAAAGATTAAaaaaGATCAAaaaaTTATGTAAATAATGATCGCTTAAAGATTCCTCTAGGTAGTCTTAGGTTGTTGGTGGGGTAAAAGCCTACCAAGCCGATAATGCTTAGCCGGTCTGAGAGGACGATCGGCCACATTGGGACTGAGACAAGGCCCAAACTTAtataAGGCAGCAGTGGGGAATTTTGGACAATGGGAGAAATCCTGATCCAGCAATGTTGCT…
OTU_95	0	0	0	0	0	0	1	0	0	0	0	0	0	0	0	0	1	0	0	0	0	25	1	0	0	0	0	0	0	0	Bacteria	1	Bacteroidetes	1	Sphingobacteria	1	Sphingobacteriales	1	Cytophagaceae	1	Arcicella	1			GATTAACGCTAGCGGCAGGCATAATACATGCAAGTTGAACGAGATAAGTTGTAGCAATACGGCTTTGAAAGTGGCGCACGGGTGCGTAACACGTATGCAACCTACCTTATACTTAGGGATAGCCTTTGGAAACGGAGATTAATACCTAATAGTACATTTGACTGGCATCGGTTGACTGTTAAAGATTTATTGGTATAAGATGGGCATGCGTCCAATTAGTTAGTTGGTGAGGTAATGGCTCACCAAGACGATGATTGGTAGGGGAACTGAGAGGTTAATCCcccACACTGGCACTGAGATACGGGCCAGACTCCTACGGGAGGCAGCAGTAGGGAATATTGGGCAATGGAGGGAACTCTGACCCAGCCATGCCGCGTGCAGGATGAAGGCGTTATGCGT…
OTU_111	0	0	0	1	17	0	0	0	4	0	0	0	0	1	0	0	0	0	0	0	0	0	0	0	0	0	0	0	0	0	Bacteria	1	Proteobacteria	1	Betaproteobacteria	1	Rhodocyclales	1	Rhodocyclaceae	1	Zoogloea	1			ATTGAACGCTGGCGGCATGCTTTACACATGCAAGTCGAACGGCAGCACGGGCTTCGGCCTGGTGGCGAGTGGCGAACGGGTGAGTAATGCATCGGAACGTACCGTGTAGTGGgggATAACGTAGCGAAAGTTACGCTAATACCGCATACGCCCCGAGGgggAAAGTGGgggACCGCAAGGCCTCACGCTATATGAGCGGCCGATGTCGGATTAGCTAGTTGGTAGGGTAAAGGCCTACCAAGGCGACGATCCGTAGCGGGTCTGAGAGGATGATCCGCCACACTGGGACTGAGACACGGCCCAGACTCCTACGGGAGGCAGCAGTGGGGAATTTTGGACAATGGGCGCAAGCCTGATCCAGCCATGCCGCGTGAGTGAAGAAGGCCTTCGGGTTGTAAA…
OTU_175	0	0	0	0	0	0	21	0	0	0	0	0	0	1	0	0	0	0	0	0	0	0	0	0	0	0	0	0	0	0	Bacteria	1	Bacteroidetes	1	Sphingobacteria	0.98	Sphingobacteriales	0.98	Cytophagaceae	0.97	Meniscus	0.97			GATGAACGCTAGCGGGAGGCCTAACACATGCAAGTCGAACGGGATTGGGAGCTTGCTCCCATGAGAGTGGCGCACGGGTGAGTAACGCGTATGCAACCTACCTTTAACTGAGGGATAGCCCATAGAAATGTGGATTAATACCTCATAGTTCTGAGATACCGCATGGTTtttCAGATAAAGCTCCGGCGGTTAAAGATGGGCATGCGTGACATTAGTTTGTTGGTGAGGTAACGGCTCACCAAGACTACGATGTCTAGGGGTTCTGAGAGGATGATCCcccACACTGGTACTGAGACACGGACCAGACTCCTACGGGAGGCAGCAGTGAGGAATATTGGTCAATGGGCGCAAGCCTGAACCAGCCATCCCGCGTGAAGGATGACGGCCCTATGGGTTGTA…
OTU_140	5	0	0	0	2	0	1	4	0	0	0	0	0	1	0	5	0	0	0	2	0	0	0	0	0	0	0	0	0	0	Bacteria	1	Bacteroidetes	1	Sphingobacteria	1	Sphingobacteriales	1	Chitinophagaceae	1	Ferruginibacter	1			GATGAACGCTAGCGGCAGGCTTAATACATGCAAGTCGAGGGGTAACAGGGGTAGCAATACCTGCTGACGACCGGCAAACGGGTGCGGAACACGTACGCAACCTCCCCATAACAGGTGAATAGCCTTCCGAAAGGGAGATTAATACACCGTAACATAACGATGAGGCATCTCATTGTTATTATAGGCTTCGGCCGGTTTTGGATGGGCGTGCGGCTGATTAGGTAGTTGGCGGGGTAACGGCCCACCAAGCCTGCGATCAGTAACTGGTGTGAGAGCACGACCAGTCACACGGGCACTGAGACACGGGCCCGACTCCTACGGGAGGCAGCAGTAAGGAATATTGGTCAATGGACGAAAGTCTGAACCAGCCATGCCGCGTGAAGGATGAAGGCCCTCTGG…
OTU_180	0	19	0	0	0	0	0	0	0	0	0	0	0	0	0	0	0	0	0	0	0	0	0	0	0	0	0	0	0	0	Bacteria	1	Bacteroidetes	1	Flavobacteria	1	Flavobacteriales	1	Flavobacteriaceae	1	Flavobacterium	0.99			GATGAACGCTAGCGGCAGGCCTAACACATGCAAGTCGAGGGGTAGAAGAGGCTTGCTTCTTTGAGACCGGCGCACGGGTGCGTAACGCGTATGCAATCTACCTTGTACAGAGGGATAGCCCAGAGAAATTTGGATTAATACCTCATGGTGTAATGATGTGGCATCACATTATTACTAAAGCTTCGGCGGTACAAGATGAGCATGCGTCCCATTAGCTAGTTGGTAAGGTAACGGCTTACCAAGGCAACGATGGGTAGGGGTCCTGAGAGGGAGATCCcccACACTGGTACTGAGACACGGACCAGACTCCTACGGGAGGCAGCAGTGAGGAATATTGGTCAATGGTCGGAAGACTGAACCAGCCATGCCGCGTGCAGGATGAAGCATCTATGGTgtgtA…
OTU_225	0	0	0	0	0	0	0	0	0	0	0	0	0	1	1	0	0	0	0	0	0	15	0	0	0	0	0	1	0	0	Bacteria	0.98	Proteobacteria	0.8	Gammaproteobacteria	0.71	Methylococcales	0.51	Methylococcaceae	0.51	Methylosarcina	0.34			AGTGAATGCTTGTGGTATGCTTTAACACATGCGAGTCTAATTTATCAATatatTtttGATTGAATGCTAAGAGGTGAGTATAGTATAAGTAGACTACCTAATAATATAGTTAAACTTttttATGTAATACTGCATAGTGGCTAGAATACATTTATAGAAaaaGCCATAAAGATTGTAAATCGTTATTAGATGTTCTTAtataAGATTAGGTTGTTGGTGAAGTAACGGTTTACCAAGCCATATCTTTAGTTGATCTGGGAGGATGGTCAACCACATTGGGATAGAGATAAGGCCCAACTTTCTTCTAAGTAGCAGCAGTGGGAATCTTGGACACTATGCGACAGCATGATCCAGCAATACCGCGTgtgtgAAGAAGGCCTGAGGGTTGTAAAGCACTTT…
OTU_156	0	0	0	0	0	0	0	0	0	0	0	0	0	0	0	15	0	0	0	0	0	0	0	1	0	0	0	0	0	0	Bacteria	1	Bacteroidetes	1	Sphingobacteria	0.99	Sphingobacteriales	0.99	Chitinophagaceae	0.97	Segetibacter	0.34			GATGAACGCTAGCGGCAGGCTTAACACATGCAAGTCGAGGGGCAGCACAGGTAGCAATACTGGGTGGCGACCGGCAAACGGGTGCGGAACACGTACGCAATCTACCTTTATCTGGGGCATAGCCCGAAGAAATTCGGATTAACACCCCATAATATACATGTAAGGCATCTTACGCGTATTAAAACTCCGGTGGATAGAGATGTGCGTGCGTCCCATTAGCTAGTTGGCAGGGTAAAGGCCTACCAAGGCGACGATGGGTAGCTGGTGTGAGAGCACGACCAGCCACACGGGCACTGAGACACGGGCCCGACTCCTACGGGAGGCAGCAGTGAGGAATATTGGTCAATGGACGCAAGTCTGAACCAGCCATGCCGCGTGAAGGATGAAGGCCTTCTGGGT…
OTU_98	0	0	0	0	0	0	0	0	0	0	0	0	1	0	0	0	0	0	0	0	0	0	0	0	1	2	0	5	6	1	Bacteria	1	Proteobacteria	1	Betaproteobacteria	1	Burkholderiales	1	Comamonadaceae	1	Comamonas	1			ATTGAACGCTGGCGGCATGCTTTACACATGCAAGTCGAACGGTAACAGGTCTTCGGATGCTGACGAGTGGCGAACGGGTGAGTAATACATCGGAACGTGCCTAGTAGTGGgggATAACTACTCGAAAGAGTAGCTAATACCGCATGAGATCTACGGATGAAAGCAGGGGACCTTCGGGCCTTGTGCTACTAGAGCGGCTGATGGCAGATTAGGTAGTTGGTGGGGTAAAGGCTTACCAAGCCTGCGATCTGTAGCTGGTCTGAGAGGACGACCAGCCACACTGGGACTGAGACACGGCCCAGACTCCTACGGGAGGCAGCAGTGGGGAATTTTGGACAATGGGCGAAAGCCTGATCCAGCAATGCCGCGTGCAGGATGAAGGCCCTCGGGTTGTAAACT…
OTU_61	0	0	0	0	0	0	0	0	0	0	0	0	0	0	0	2	0	3	1	2	0	0	1	0	0	1	0	3	0	0	Bacteria	1	Proteobacteria	1	Gammaproteobacteria	0.93	Thiotrichales	0.37	Thiotrichaceae	0.37	Beggiatoa	0.37			ATTGAACGCTGGCGGCGTGCCTAACACATGCAAGTCGGGCGGTAACAGGCGTAGCAATACGTGCTGACGAGCGGCGAACGGGTGAGCAATGCTTCGGAATCTGCCCAATGATGGGGAATAACCAGTCGAAAGATTGGCTAATACCGCATACGCCCTTCGGgggAAAGCGGgggTCGCAAGACCTCGCGTCGATGGATGAGCCGAAGTCGGATTAGCTAGTTGGTAGGGTAACGGCCTACCAAGGCGACGATCCGTAGCTGGTCTGAGAGGACGACCAGCCACACTGGGACTGAGACACGGCCCAGACTCCTACGGGAGGCAGCAGTGGGGAATATTGGACAATGGgggCAACCCTGATCCAGCGACGCCGCGTgtgtgAAGAAGGCCTGCGGGTTGTAA…
OTU_78	0	0	0	0	0	0	0	0	0	0	0	0	13	0	0	0	0	0	0	0	0	0	0	0	0	0	0	0	0	0	Bacteria	1	Cyanobacteria/Chloroplast	0.69	Chloroplast	0.68			Chloroplast	0.68	Bangiophyceae	0.51			GATGAACGCTGGCGATGTGCCTAACACATGCAAGTCGTACGAAaaaTAAACTTtttAGTGGCAAACGGGTGAGAAATGCGTGAGAATTTGCCTTTAGGAAGAGGATAACAATTAGAAATATTTGCTAAAACTCTAtataGCACTAAATATTCTTAGATTTACTTAAaaaaaaaTACTTAAaaaaaaGGTTAACATTAGTCCTAGTTCAACCATGTATCCATATTttttAAGATTTACTTAAATAAATCAAaaaTAATAATGtgtgAAaaaaGAAATTTGCCTAAAGAAGAGCTCGCGTCTGATTAGCTAGTTGGTAGGGTAAAGGCCTACCAAGGCGACAATCAGTAGCTGGTCTGAGAGGATGATCAGCCACACTGAAACTGAGATACGGTTCAGACT…
OTU_104	0	0	0	0	0	0	0	2	0	0	0	0	0	8	0	0	0	0	0	0	0	0	0	0	0	0	0	1	1	0	Bacteria	1	Proteobacteria	1	Gammaproteobacteria	1	Xanthomonadales	1	Xanthomonadaceae	1	Pseudoxanthomonas	1			AGTGAACGCTGGCGGTAGGCCTAACACATGCAAGTCGAACGGCAGCACAGGAGAGCTTGCTctctGGGTGGCGAGTGGCGGACGGGTGAGGAATACATCGGAATCTACCTTTTCGTGGgggATAACGTAGGGAAACTTACGCTAATACCGCATACGACCTACGGGTGAAAGTGGgggACCGCAAGGCCTCACGCGATTAGATGAGCCGATGTCCGATTAGCTAGTTGGCGGGGTAATGGCCCACCAAGGCGACGATCGGTAGCTGGTCTGAGAGGATGATCAGCCACACTGGAACTGAGACACGGTCCAGACTCCTACGGGAGGCAGCAGTGGGGAATATTGGACAATGGGCGCAAGCCTGATCCAGCCATACCGCGTGGGTGAAGAAGGCCTTCGGGT…
OTU_182	0	0	1	0	11	0	0	0	0	0	0	0	0	0	0	0	0	0	0	0	0	0	0	0	0	0	0	0	0	0	Bacteria	1	Bacteroidetes	1	Sphingobacteria	0.99	Sphingobacteriales	0.99	Chitinophagaceae	0.98	Segetibacter	0.16			GATGAACGCTAGCGGCAGGCTTAACACATGCAAGTCGAGGGGTAACAGGTCTTCGGACGCTGACGACCGGCAAACGGGTGCGGAACACGTACGCAACATACCCTTTACAGGgggATAGCCCGGAGAAATCCGGATTAACACCCCATAGGATAATAGTGAGGCATCTCACAGTTATTAAaaaTTTATTGGTAAAGGATTGGCGTGCGTCCCATTAGATAGTTGGCGGGGTAATGGCCCACCAAGTCAGCGATGGGTAGCTGGTGTGAGAGCACGACCAGCCACACGGGCACTGAGACACGGGCCCGACTCCTACGGGAGGCAGCAGTGAGGAATATTGGTCAATGGACGCAAGTCTGAACCAGCCATGCCGCGTGGAGGATGACAGCCTTCTGGGTTGTA…
OTU_251	10	0	0	0	0	0	0	0	0	0	0	0	0	0	0	0	0	0	0	0	0	0	0	0	0	0	0	0	0	0	Bacteria	1	Proteobacteria	1	Deltaproteobacteria	1	Bdellovibrionales	1	Bacteriovoracaceae	1	Peredibacter	1			AACGAACGCTGGCGGCGTGCCTAATACATGCAAGTCGAACGTGAAAGTACTTCGGTATGAGTAAAGTGGCGCACGGGTGAGTAACACGTGGGTAATCTGCCTTTTAGTGGGGAATAACACAGGGAAACCTGTGCTAATGCCGCATATGTAAGTAATTACAAAGATGGCCTCTATTTATAAGCTATCGCTAAAAGAAGAGCCCGCGGCCTATTAGCTAGTTGGTGGGGTAAGAGCCTACCAAGGCAACGATAGGTATCCGGTCTGAGAGGATGATCGGACacacTGGAACTGAGACACGGTCCAGACTCCTACGGGAGGCAGCAGTAGGGAATATTGCGCAATGGgggAAACCCTGACGCAGCAACGCCGCGTGAGTGAGGAAGGTCTTCGGATTGTAAA…
OTU_176	0	0	0	0	0	0	9	0	0	0	0	0	0	0	0	0	0	0	0	0	0	0	0	0	0	0	0	0	0	0	Bacteria	1	Bacteroidetes	1	Flavobacteria	1	Flavobacteriales	1	Cryomorphaceae	1	Fluviicola	1			GATGAACGCTAGCGGCAGGCCTAACACATGCAAGTCGAGGGGTAGCAGAATTAAGCTTGCTTAATTGCTGACGACCGGCGCACGGGTGCGTAACGCGTATGCAACCTACCCTATACTGGGGTATAGCCCGAAGAAATTCGGATTAATCCcccATAGTAtatatGAATCGCATGGTTTAtatatTAAAGGTTACGGTATAGGATGGGCATGCGTCCCATTAGCTAGATGGTGAGGTAACGGCTCACCATGGCGACGATGGGTAGGgggCCTGAGAGGGTGGTCCcccACACTGGTACTGAGACACGGACCAGACTCCTACGGGAGGCAGCAGTGAGGAATATTGGTCAATGGGCGAGAGCCTGAACCAGCCATGCCGCGTGCAGGAAGACGGTCCTATGG…
OTU_29	0	0	0	0	0	0	0	0	0	0	0	0	0	0	0	1	0	3	0	0	0	0	2	0	0	1	1	0	0	0	Bacteria	1	Bacteroidetes	1	Bacteroidetes_incertae_sedis	0.99					Ohtaekwangia	0.99			GATGAACGCTAGCGGCAGGCCTAATACATGCAAGTCGAACGGTAAGTGTTATAGCAATATGACACCAAGAGTGACGCACGGGTGCGTAACACGTATGCAACCTACCCTTTACAGGCGGATAGCTCGGGGAAACTCGAATTAACCCGCCATAATATAATTGAATGGCATCATTTGATTATTAAATCTGCGGAGGTAAAGGATGGGCATGCGTCTGATTAGTTAGTTGGTAGTGTAACGGACTACCAAGACGATGATCAGTAGGGGAACTGAGAGGTTGATCCcccACACTGGCACTGAGATACGGGCCAGACTCCTACGGGAGGCAGCAGTAGGGAATATTGGTCAATGGGTGAGAGCCTGAACCAGCCATGCCGCGTGCAGGAAGAAGGCCTTCTGGGT…
OTU_54	0	0	0	0	0	0	0	0	0	0	0	0	0	0	0	0	2	1	1	1	0	0	0	1	0	1	0	0	0	0	Bacteria	1	Acidobacteria	1	Acidobacteria_Gp6	1					Gp6	1			AATCAACGCTGGCGGCGTGCCTAACACATGCAAGTCGAACGCGAAAGCCCCGCAAGGGGCAAGTAGAGTGGCAAACGGGTGAGTAACACGTGGGTGACCTGCCTTCGAGCGGgggATAACGTCCCGAAAGGGACGCTAATACCGCATAACATCCTGCCTTTGAAGAGGTGGAGATCAAAGCTGGGGATCGCAAGACCCGGCACTTGAAGAGGGGCCCGCGTCTGATTAGCTAGTTGGTGGGGTAACGGCCTACCAAGGCAACGATCAGTATCCGGCCTGAGAGGGCGGACGGACacacTGGGACTGAGACACGGCCCAGACTCCTACGGGAGGCAGCAGTGGGGAATTGTTCGCAATGGGCGCAAGCCTGACGACGCAACGCCGCGTGGAGGATGAAGA…
OTU_133	0	0	0	0	0	0	0	0	2	0	0	0	2	0	0	0	0	0	0	0	0	0	0	0	0	0	0	0	0	2	Bacteria	1	Proteobacteria	1	Betaproteobacteria	1	Rhodocyclales	1	Rhodocyclaceae	1	Methyloversatilis	1			ATTGAACGCTGGCGGAATGCTTTACACATGCAAGTCGAGCGGCAGCGCGGTCTTCGGACTGGCGGCGAGCGGCGAACGGGTGAGTAATACATCGGAACATGCCCAGTCGTGGgggATAACACTTCGAAAGAAGTGCTAATACCGCATACGTCCTGAGGGAGAAAGCGGgggATCGCAAGACCTCGcgcgATTGGAGTGGCCGATGTCAGATTAGCTAGTTGGTGGGGTAAAGGCCTACCAAGGCAACGATCTGTAGCTGGTCTGAGAGGATGATCAGCCACACTGGGACTGAGACACGGCCCAGACTCCTACGGGAGGCAGCAGTGGGGAATTTTGGACAATGGgggCAACCCTGATCCAGCCATTCCGCGTGAGTGAAGAAGGCCTTCGGGTTGTAAA…
OTU_188	0	5	0	0	0	0	0	0	0	0	0	0	0	0	0	0	1	0	0	0	0	0	0	0	0	0	0	0	0	0	Bacteria	1	Proteobacteria	1	Betaproteobacteria	1	Rhodocyclales	1	Rhodocyclaceae	1	Azoarcus	1			ATTGAACGCTGGCGGCATGCTTTACACATGCAAGTCGAACGGCAGCGGgggCTTCGGCCTGCCGGCGAGTGGCGAACGGGTGAGTAATGCATCGGAACGTACCCAGTCGTGGgggATAACTACGCGAAAGCGTAGCTAATACCGCATACGCCCTGAGGgggAAAGCGGgggACCTTCGGGCCTCGcgcgATTGGAGCGGCTGATGTCGGATTAGCTAGTTGGTGGGGTAAAGGCCTACCAAGGCGACGATCCGTAGCTGGTCTGAGAGGATGATCAGCCACACTGGGACTGAGACACGGCCCAGACTCCTACGGGAGGCAGCAGTGGGGAATTTTGGACAATGGGCGCAAGCCTGATCCAGCCATGCCGCGTGAGTGAAGAAGGCCTTCGGGTTGTAAA…
OTU_22	0	0	0	0	0	0	0	0	0	0	0	0	0	0	0	1	1	0	0	1	0	0	0	0	0	1	2	0	0	0	Bacteria	1	Nitrospira	1	Nitrospira	1	Nitrospirales	1	Nitrospiraceae	1	Nitrospira	1			AATGAACGCTGGCGGCgcgcCTAATACATGCAAGTCGAGCGAGAAGACGTAGCAATACGTTTGTAAAGCGGCGAACGGGTGAGGAATACATGGGTAACCTACCCTCGAGTGGGGAATAACTAGCCGAAAGGTTAGCTAATACCGCGTACGCTCCTTGGACTTCGGTTCAGGGAGGAAAGCGATACCGTGGGTATCGCGCTCTTGGATGGGCTCATGTCCTATCAGCTTGTTGGTGAGGTAACGGCTCACCAAGGCTTCGACGGGTAGCTGGTCTGAGAGGACGATCAGCCACACTGGCACTGCGACACGGGCCAGACTCCTACGGGAGGCAGCAGTAAGGAATATTGCGCAATGGGCGAAAGCCTGACGCAGCGACGCCGCGTGGgggATGAAGGTCTT…
OTU_226	0	0	0	0	0	0	0	0	1	0	0	0	0	0	0	0	0	1	0	0	0	0	4	0	0	0	0	0	0	0	Bacteria	1	Proteobacteria	1	Gammaproteobacteria	0.9	Chromatiales	0.76	Ectothiorhodospiraceae	0.6	Ectothiorhodosinus	0.54			ATTGAACGCTGGCGGCACGCTTAACACATGCAAGTCGAACGGTAACAGGTCTGCACACTCTATAGTTTTGGAAACAGAGCTATAGAGGTGCAGATGCTGACGAGTGGCGAACGGGTGAGTAACGCGTAGGGATCTGTCCTGTAGAGGgggATAACCCGGGGAAACTCGGGCTAATACCGCATACGTTCTGAGGAAGAAAGGTCGGGACCGCAAGGCCGATCGCTACAGGGTGAACCTGCGTCGGATTAGCTAGTTGGCGGGGTAAGGGCCCACCAAGGCGATGATCCGTAGCTGGTCTGAGAGGACGAACAGCCACACTGGGACTGAGACACGGCCCAGACTCCTACGGGAGGCAGCAGTGGGGAATATTGGACAATGGGCGCAAGCCTGATCCAGCGA…
OTU_49	0	0	0	0	0	0	0	0	0	0	0	0	0	0	0	0	0	1	1	0	0	0	0	1	2	1	0	0	0	0	Bacteria	1	Proteobacteria	1	Betaproteobacteria	1	Rhodocyclales	0.47	Rhodocyclaceae	0.47	Denitratisoma	0.31			ATTGAACGCTGGCGGCATGCTTTACACATGCAAGTCGAACGGTAACGCGGgggCAACCCTGGCGACGAGTGGCGAACGGGTGAGTAATACATCGGAACATGTCCTGGAGTGGgggATAGCTCGGCGAAAGCCGGATTAATACCGCATACGCTCTGAGGAGGAAAGCGGgggACCGAAAGGCCTCGCGCTGCAGGAGTGGCCGATGTCGGATTAGCTAGTTGGTGAGGTAAAGGCTCACCAAGGCGACGATCCGTAGCTGGTCTGAGAGGATGATCAGCCACACTGGGACTGAGACACGGCCCAGACTCCTACGGGAGGCAGCAGTGGGGAATTTTGGACAATGGgggCAACCCTGATCCAGCCATGCCGCGTGAGTGAAGAAGGCCTTCGGGTTGTAAA…
OTU_91	0	0	0	0	0	0	0	0	0	0	0	0	0	0	0	0	0	0	0	0	0	0	0	0	0	0	0	4	2	0	Bacteria	0.95	Chlamydiae	0.15	Chlamydiae	0.15	Chlamydiales	0.15	Simkaniaceae	0.14	Simkania	0.14			GGTGAACGCTGGCAATatatataACACATGCTAATCGAATGATATCTTCCGGAATAGAAATCATGGTGTACGGGTGAGTAATGCATAGATAATTTGCCTTTAGGTCTGGAATAATTGGACTGAAAGTTTCAGCTGCGGTTGTTAGTAATTCATGATAAaaaTACTGGATatataAAAGAAAGATAAAAGATTGCCTAAAGAAGAGTTTATGTAGGATTAAACAATGATTGATGGTAGGGTAAAGGCCTACCATGTCGGTGATCCTTAGTTGGTCTGAGAGGACGACCAGCCACACTGGGACTGAGATAAGGCCCAGGCTTAATTGCCAGCAGTGAAGAATCTTAGGCAATGTACGAAAGTGTGACCTAGTGATATTGCGTGAATGAGGAAAACAGTGTA…
OTU_145	0	0	0	0	0	0	0	0	0	0	0	0	0	0	0	0	0	2	0	0	0	1	0	0	1	1	0	0	0	0	Bacteria	1	Bacteroidetes	1	Bacteroidetes_incertae_sedis	0.93					Ohtaekwangia	0.93			GATGAACGCTAGCGGCAGGCCTAATACATGCAAGACGAACGGTAAGTTGGGTAGCAATACTTGACCTAGAGTGTCGTAAGGGTGCGTAACACGTATGCAATCTGCCCTCAACAGGAGGATAGCTCGCCGAAAGGCGAATTAACACTCCATAAGATGATAGTGTGGCATCAcacaGTCATTAAAACTCCGGTGGTTGAGGATGAGCATGCGGATGATTAGCTAGTTGGTGAGGTAACGGCTCACCAAGGCGATGATCAATAGGGGAACTGAGAGGTTGATCCcccACACTGGCACTGAGATACGGGCCAGACTCCTACGGGAGGCAGCAGTAGGGAATATTGGACAATGGGCGCAAGCCTGATCCAGCCATGCCGCGTGCAGGAAGAAGGCTTTCTGAGT…
OTU_208	0	0	3	0	0	0	0	0	0	1	0	0	0	0	0	0	0	0	0	0	0	0	0	0	1	0	0	0	0	0	Bacteria	1	Bacteroidetes	1	Sphingobacteria	1	Sphingobacteriales	1	Sphingobacteriaceae	1	Pedobacter	0.96			GATGAACGCTAGCGGCAGGCCTAATACATGCAAGTCGAACGATACCAGagagCTTGCTTTCTGGGAAAGTGGCGCACGGGTGCGTAACGCGTATGCAACCTACCTTAATCAGGgggATAGCCTCTCGAAAGagagaTTAACACCGCATAAAATCACACTTCGGCATCGAAGAATGATCAAATATTTATAGGATTAAGATGGGCATGCGTGACATTAGCTAGTTGGTAAGGTAACGGCTTACCAAGGCTACGATGTCTAGGGGATCTGAGAGGATGACCccccACACTGGTACTGAGACACGGACCAGACTCCTACGGGAGGCAGCAGTAAGGAATATTGGTCAATGGgggCAACCCTGAACCAGCCATGCCGCGTGCAGGAAGACGGCCCTACGGGTTG…
OTU_33	0	0	0	0	0	0	0	0	0	0	0	0	0	0	0	0	1	1	0	1	0	0	0	0	1	0	1	0	0	0	Bacteria	1	Bacteroidetes	1	Bacteroidetes_incertae_sedis	0.98					Ohtaekwangia	0.98			GATGAACGCTAGCGGCAGGCCTAATACATGCAAGTCGAACGGTAAATATTTTAGCAATAGAATATGAGAGTGACGTACGGGTGCGTAACACGTATGCAACCTACCCTTTACAGGCGGATAGCTCGGGGAAACTCGAATTAACCCGTCATAAGATCATAGAGTGGCATCACTTAGTGATTAAAATTACGGTGGTAAAGGATGGGCATGCGTCTGATTAGTTAGTTGGTGCGGGTAACGGCCCACCAAGACGATGATCAGTAGGGGAACTGAGAGGTTGATCCcccACACTGGCACTGAGATACGGGCCAGACTCCTACGGGAGGCAGCAGTAGGGAATATTGGTCAATGGATGGAAGTCTGAACCAGCCATGCCGCGTGCAGGAAGAAGGCCTTCTGGGT…
OTU_46	0	0	0	0	0	0	0	0	0	0	0	0	0	0	0	1	1	1	0	0	0	0	0	0	0	2	0	0	0	0	Bacteria	1	Acidobacteria	1	Acidobacteria_Gp6	1					Gp6	1			AATCAACGCTGGCGGCGTGCCTAACACATGCAAGTCGAACGCGAAAGGGGAGCAATCCCTGAGTAGAGTGGCAAACGGGTGAGTAACACGTGGGTGACCTGCCTTCGAGTGGgggATAACGTTCCGAAAGGAACGCTAATACCGCATGACATCCTGCTCTTGGACGAGCGGAGATCAAAGCTGGGGATCGCAAGACCTGGCGCTTGAAGAGGGGCCCGCGCCTGATTAGCTAGTTGGTGAGGTAACGGCTCACCAAGGCAACGATCAGTATCCGGCCTGAGAGGGCGGACGGACacacTGGGACTGAGACACGGCCCAGACTCCTACGGGAGGCAGCAGTGGGGAATTGTTCGCAATGGGCGCAAGCCTGACGACGCAACGCCGCGTGGAGGATGAAGA…
OTU_200	0	3	0	0	0	0	0	0	0	0	0	0	0	0	1	0	0	0	0	0	0	0	0	0	0	0	0	0	0	0	Bacteria	0.96	Proteobacteria	0.34	Alphaproteobacteria	0.2	Caulobacterales	0.1	Hyphomonadaceae	0.1	Robiginitomaculum	0.05			ACGCTGTTtttCGACCAATTGTCTTTTGACCAGTTtttCTACCAGTAAGCTACAGGTGGATTGATGAATGGCAAGGTTTTCTGCCAGGCGGGAGACCCCTAATTCTGGATGAGTAGCGATTTCATGCAAGAGCCAAAGCTGTGAACCTGAGATGCCGCACGAAGCTTCAATTTCTCTAAAATGTTGTCTGACGGTACCGAAAATAATTCGAAATTGTTTTAAAGCTTCTTTTGCGAGTGAGTTTTGCATGATTAATTTAATGTAAATATTTATGTTCATTTTACCAGTTTCCACCAGATAACATGGCTTCGCTATGTTTATCGCGATAAaaaTTCCCGTTTCTATCGGTGGTTTTAGACAAaaaaGTCGTTtttAGCCACAAACGCTAGCCCGGTTTGG…
OTU_80	0	0	0	0	0	0	0	0	0	0	0	0	0	0	0	0	0	1	1	1	0	0	0	0	1	0	0	0	0	0	Bacteria	1	Acidobacteria	1	Acidobacteria_Gp6	1					Gp6	1			AATCAACGCTGGCGGCGTGCCTAACACATGCAAGTCGAACGCGGTTACCTCGCAAGGGGTAACTGAGTGGCGAACGGGTGAGTAACACGTGGGTGACCTACCTTCGAGTGGgggATAACGTCCCGAAAGGGACGCTAATACCGCATAACATCCTGCCTTTGAACAGGTGGAGATCAAAGCCGGGGATCGCAAGACCTGGCGCTTGATGAGGGGCCCGCGCCTGATTAGCTAGTTGGTGGGGTAATGGCTCACCAAGGCGACGATCAGTATCCGGCCTGAGAGGGCGGACGGACacacTGGGACTGAGACACGGCCCAGACTCCTACGGGAGGCAGCAGTGGGGAATTGTTCGCAATGGGCGCAAGCCTGACGACGCAACGCCGCGTGGAGGATGAAGGT…
OTU_94	0	0	0	0	0	0	0	0	0	0	0	0	0	0	0	2	0	1	0	0	0	0	0	0	1	0	0	0	0	0	Bacteria	1	Bacteroidetes	1	Sphingobacteria	1	Sphingobacteriales	1	Chitinophagaceae	1	Niastella	0.86			GATGAACGCTAGCGGCAGGCTTAATACATGCAAGTCGAGGGGCAGCACAGTGTAGCAATACATGGGTGGCGACCGGCAAACGGGTGCGGAACACGTACGCAACCTTCCCAAAACTGGTGAATAGCCTTTCGAAAGagagaTTAATACACCGTAACTTAATGAAGTGGCATCACTTTATTAATATAGCTCCGGCGGTTTTGGATGGGCGTGCGCCTGATTAGGTAGTTGGCGGAGTAACAGCCCACCAAGCCTACGATCAGTAACTGGTGTGAGAGCACGACCAGTCACACGGGCACTGAGACACGGGCCCGACTCCTACGGGAGGCAGCAGTAAGGAATATTGGTCAATGGACGCAAGTCTGAACCAGCCATGCCGCGTGGAGGATGAAGGTCCTCTGG…
OTU_96	0	0	0	0	0	0	0	0	0	0	0	0	0	0	0	0	1	1	0	0	1	0	0	0	0	0	0	1	0	0	Bacteria	1	Bacteroidetes	1	Bacteroidetes_incertae_sedis	0.96					Ohtaekwangia	0.96			GATGAACGCTAGCGGCAGGCCTAATACATGCAAGCTGAACGGTAAATATTATAGCAATATAGTATGAGAGTAGCGTAAGGGTGCGTAACACGTATGCAATCTGCCCTGTACAGGAGGATAGCTCGGGGAAACCCGGATTAATACTTCGTAATATTGATGAGTGGCATCACTTGACAATTAAAGTCGCAAGATGGTACAGGATGAGCATGCGTCTGATTAGCTAGTTGGTAGTGTAACGGACTACCAAGGCGATGATCAGTAGGGGAACTGAGAGGTTGATCCcccACACTGGCACTGAGATACGGGCCAGACTCCTACGGGAGGCAGCAGTAGGGAATATTGGTCAATGGATGCAAGTCTGAACCAGCCATGCCGCGTGCAGGAAGAAGGCCTTCTGGG…
OTU_112	0	0	0	0	0	0	0	0	0	0	0	0	0	0	0	0	0	0	0	0	1	0	0	0	1	0	1	0	0	0	Bacteria	1	Chlorobi	0.42	Ignavibacteria	0.39	Ignavibacteriales	0.39	Ignavibacteriaceae	0.39	Ignavibacterium	0.39			GACGAACGCTGGCGGCGTGCCTAACACATGCAAGTCAACGAGAAAGGGGTAGCAATATCCCGAGTAAAGTGGCGCACGGGTGAGTAACACGTAGGTAATCTGCCATAAGGACGGGGACAACCCCGGGAAACCGGGGCTAATACCCGATGATGCAACGATATCACATGATGTTGTTGTCAAATACCGCAAGGTGCCTTATGATGAACCTGCGTCCCATTAGGTAGTTGGTAGGGTAACGGCCTACCAAGCCTACGATGGGTAGCTGGTCTGAGAGGATGATCAGCCACACTGGAACTGAGACACGGTCCAGACTCCTACGGGAGGCAGCAGTGAGGAATATTGCGCAATGGCCGAAAGGCTGACGCAGCGACGCCGCGTGAGGGATGAAGTCCGTTAGGA…
OTU_144	0	0	0	0	0	0	0	0	0	0	0	0	0	0	0	0	0	1	1	0	0	0	0	0	1	0	0	0	0	0	Bacteria	1	Proteobacteria	1	Gammaproteobacteria	0.94	Xanthomonadales	0.3	Sinobacteraceae	0.28	Steroidobacter	0.28			ATTGAACGCTGGCGGCGTGCTTAACACATGCAAGTCGAGCGGTAACAGGTGTAGCAATACATGCTGACGAGCGGCGAACGGGTGAGTAATGCTTCGGAATCTTCCTCGTAGTGGGGAATAACCTGGGGAAACTCAGGCTAATACCGCATACGAACTACGGTTGAAAGCAGGGGATCGCAAGACCTTGCGCTATGAGATGAGCCGAAGTCGGATTAGCTAGTTGGTGGGGTAAAGGCCTACCAAGGCGACGATCCGTAGCTGGTCTGAGAGGACGACCAGCCACACTGGGACTGAGACACGGCCCAGACTCCTACGGGAGGCAGCAGTGGGGAATATTGGACAATGGgggCAACCCTGATCCAGCGACGCCGCGTgtgtgAAGAAGGCCTGCGGGTTGTA…
OTU_64	0	0	0	0	0	0	0	0	0	0	0	0	0	0	0	1	0	1	0	0	0	0	0	1	0	0	0	0	0	0	Bacteria	1	Bacteroidetes	1	Sphingobacteria	1	Sphingobacteriales	1	Chitinophagaceae	1	Terrimonas	0.95			GATGAACGCTAGCGGCAGGCTTAATACATGCAAGTCGAGGGGCAGCATGAGTGTAGCAATACATTTGATGGCGACCGGCAAACGGGTGCGGAACACGTACACAACCTTCCTTTGAGCGGGGAATAGCCCGGGGAAACCCGGATTAATACCTCATAGTATGGTGAAGAGGCATCTCTTTACTATTAAAGATTTATCACTTAAAGATGGGTGTGCGGCTGATTAGGTAGTTGGCGGGGTAACGGCCCACCAAGCCTACGATCAGTAACTGGTGTGAGAGCACGACCAGTCACACGGGCACTGAGACACGGGCCCGACTCCTACGGGAGGCAGCAGTAAGGAATATTGGTCAATGGACGAAAGTCTGAACCAGCCATGCCGCGTGGAGGATGAAGGTCCTCT…
OTU_83	0	0	0	0	0	0	0	0	0	0	0	0	0	0	0	0	0	0	0	0	0	1	0	0	1	1	0	0	0	0	Bacteria	1	Proteobacteria	1	Betaproteobacteria	1	Burkholderiales	0.82	Burkholderiales_incertae_sedis	0.34	Methylibium	0.16			ATTGAACGCTGGCGGCATGCCTTACACATGCAAGTCGAACGGCAGCACGGgggCAACCCTGGTGGCGAGTGGCGAACGGGTGAGTAATACATCGGAACGTGTCCTCTTGTGGgggATAACCAGTCGAAAGATTGGCTAATACCGCATGAGATCGCAAGATGAAAGCGGgggACCGCAAGGCCTCGcgcgAGAGGAGCGGCCGATGTCGGATTAGCTAGTTGGTGGGGTAAAAGCCTACCAAGGCGACGATCCGTAGCTGGTCTGAGAGGACGACCAGCCACACTGGGACTGAGACACGGCCCAGACTCCTACGGGAGGCAGCAGTGGGGAATTTTGGACAATGGGCGCAAGCCTGATCCAGCCATGCCGCGTgtgtgAAGAAGGCCTTCGGGTTGTAAA…
OTU_103	0	0	0	0	0	0	0	0	0	0	0	0	0	0	0	0	0	0	0	0	0	0	0	0	1	0	1	0	0	0	Bacteria	1	Proteobacteria	1	Betaproteobacteria	1	Neisseriales	1	Neisseriaceae	1	Chitinibacter	0.93			ATTGAACGCTGGCGGCATGCTTTACACATGCAAGTCGAACGGCAGCACGGACTTCGGTCTGGTGGCGAGTGGCGAACGGGTGAGTAATACATCGGAATGTACCCAGTAATGGgggATAACGCTTCGAAAGGAGTGCTAATACCGCATACGCCCTACGGgggAAAGAGGgggATCGCAAGACCTCTTGTTATTGGAGCAGCCGATGGCTGATTAGCTAGTTGGTAGGGTAAAGGCCTACCAAGGCAACGATCAGTAGCGGGTCTTAGAGGACGATCCGCCACACTGGAACTGAGACACGGTCCAGACTCCTACGGGAGGCAGCAGTGGGGAATCTTGGACAATGGGCGCAAGCCTGATCCAGCAATGCCGCGTGCGTGAAGAAGGCCTTCGGGTTGTAAA…
OTU_117	0	0	0	0	0	0	0	0	0	0	0	0	0	0	0	0	0	0	0	0	0	0	0	1	1	0	0	0	0	0	Bacteria	1	Proteobacteria	1	Betaproteobacteria	0.98	Rhodocyclales	0.61	Rhodocyclaceae	0.61	Georgfuchsia	0.39			ATTGAACGCTGGCGGCATGCTTTACACATGCAAGTCGAGCGGCAGCGCGGgggCAACCCTGGCGGCGAGCGGCGAACGGGTGAGTAATACATCGGAACGTGTCCTGTAGTGGgggATAACCAATCGAAAGATTGGCTAATACCGCATACGATCTACGGATGAAAGCGGgggATCGCAAGACCTCGCGCTATAGGAGCGGCCGATGTCCGATTAGCTAGTTGGCGGGGTAATGGCCCACCAAGGCGACGATCGGTAGCTGGTCTGAGAGGATGATCAGCCACACTGGAACTGAGACACGGTCCAGACTCCTACGGGAGGCAGCAGTGGGGAATTTTGGACAATGGGCGCAAGCCTGATCCAGCCATGCCGCGTGAGTGAAGAAGGCCTTCGGGTTGTAAA…
OTU_131	0	0	0	0	0	0	0	0	0	0	0	0	0	0	0	0	1	0	0	0	0	0	0	0	0	0	0	1	0	0	Bacteria	1	Bacteroidetes	1	Sphingobacteria	1	Sphingobacteriales	1	Chitinophagaceae	1	Niastella	0.84			GATGAACGCTAGCGGCAGGCTTAATACATGCAAGTCGTGGGGCAGCACAGTGTAGCAATACATGGGTGGCGACCGGCAAACGGGTGCGGAACACGTACGCAACCTTCCTTCAAGTGGgggATAGCCCGGGGAAACCCGGATTAATACCCCGTAATACTGTGAGATGGCATCATCTTACACTTATAGCTCCGGCGCTTGAAGATGGGCGTGCGCCTGATTAGGTAGTTGGCGGGGTAACGGCCCACCAAGCCTTCGATCAGTAACTGGTGTGAGAGCACGACCAGTCACACGGGCACTGAGACACGGGCCCGACTCCTACGGGAGGCAGCAGTAAGGAATATTGGTCAATGGACGCAAGTCTGAACCAGCCATGCCGCGTGGAGGATGAAGGTCCTCTGG…
OTU_164	0	0	0	0	0	0	0	0	0	0	0	0	0	0	0	0	0	0	0	0	0	0	1	0	0	0	1	0	0	0	Bacteria	1	Proteobacteria	1	Gammaproteobacteria	0.97	Gammaproteobacteria_incertae_sed	0.16			Methylonatrum	0.09			ATTGAACGCTGGCGGCGTGCTTAACACATGCAAGTCGAGCGGTAACAGGCGTAGCAATACGTGCTGACGAGCGGCGAACGGGTGCGTAATACATGGGAATCTGCCTTTTAGTGGGGAATAACCCGGCGAAAGCCGGGCTAATGCCGCATAAGATCTTCGGATGAAAGCGGgggATCGTAAGACCTCGCGCTGATAGATGAGCCCATGCCGGATTAGCTAGTTGGTGAGGTAACGGCTCACCAAGGCGACGATCCGTAGCTGGTCTGAGAGGACGGCCAGCCACACTGGGACTGAGACACGGCCCAGACTCCTACGGGAGGCAGCAGTGGGGAATATTGGACAATGGgggAAACCCTGATCCAGCGACGCCGCGTgtgtgAAGAAGGCCTGCGGGTTGTA…
OTU_171	0	0	0	0	0	0	0	0	0	0	0	0	0	0	0	0	0	0	1	0	0	1	0	0	0	0	0	0	0	0	Bacteria	1	Proteobacteria	1	Gammaproteobacteria	1	Xanthomonadales	1	Sinobacteraceae	1	Steroidobacter	1			ATTGAACGCTGGCGGCGTGCCTAACACATGCAAGTCGAGCGGCAGCGCGGGAGCAATCCTGGCGGCGAGCGGCGGACGGGTGAGTAACGCTTGGGAATCTGCCTGTTAGTGGgggACAACCCGGGGAAACTCGGGCTAATACCGCATACGCACTACGGTGGAAAGCCGGGGACCGCAAGGCCTGGCGCTAACAGATGAGCCCAAGTCGGATTAGCTAGTTGGTAGGGTAACGGCCTACCAAGGCGACGATCCGTAACTGGTCTGAGAGGACGACCAGTCACACCGGAACTGAGACACGGTCCGGACTCCTACGGGAGGCAGCAGTGGGGAATATTGGACAATGGgggAAACCCTGATCCAGCGACGCCGCGTGGGTGAAGAAGGCCTGCGGGTTGTAAA…
OTU_204	0	0	0	0	0	0	0	2	0	0	0	0	0	0	0	0	0	0	0	0	0	0	0	0	0	0	0	0	0	0	Bacteria	1	Bacteroidetes	1	Bacteroidetes_incertae_sedis	0.81					Ohtaekwangia	0.81			GATGAACGCTAGCGGCAGGCATAATACATGCAAGACGAACGGCAAGAATTGTAGCAATACGGTTCCTAGAGTGTCGTACGGGTGCGTAACACGTATGCAACCTACCTTTTACAGGAGTATAGCTCGGTGAAAACCGAATTAACCCTCCATAACATGACGATTGGGCATCCAACTGTCATTAAAACTGCGGTGGTAAAAGATGGGCATGCGATTGATTAGTTAGTTGGCAGTGTAACGGACTACCAAGACGATGATCAATAGGGGACCTGAGAGGGTGATCCcccACACTGGCACTGAGATACGGGCCAGACTCCTACGGGAGGCAGCAGTAGGGAATATTGGACAATGGGTGAGAGCCTGATCCAGCCATGCCGCGTGCAGGAAGAAGGCGTTATGCGT…
OTU_228	0	0	0	0	0	0	0	0	0	0	1	0	0	0	0	0	0	0	0	0	0	0	0	0	0	0	0	0	0	1	Bacteria	1	Verrucomicrobia	1	Opitutae	1	Opitutales	1	Opitutaceae	1	Opitutus	0.99			AATGAACGCTGGCGGCGTGGTTAAGACATGCAAGTCGAACGGTTtttGTTGTGTAGCAATACATAACAAAAGCAGTGGCGAACGGGTGCGTAACACGTGAACAATCTACCTTCAAATGGGGAATAGCTCGCCGAAAGGCGAATTAATACCGCATGTGGTTGCCTCTCGCATGAGAAGCATACCAAAGTCAGGGACCGCAAGGCCTGACGTTAGAAGAGGAGTTCGCGGCCTATCAGCTAGTTGGCGAGGTAACGGCTCACCAAGGCTAAGACGGGTAGCTGGTCTGAGAGGATGATCAGCCACACTGGAACTGAGACACGGTCCAGACACCTACGGGTGGCAGCAGTTTCGAATCATTCACAATGGGCGAAAGCCTGATGGTGCGACGCCGCGTGAGGG…
OTU_50	0	0	0	0	0	0	0	0	0	0	0	0	0	0	0	0	0	0	0	0	1	0	1	0	0	0	0	0	0	0	Bacteria	1	Verrucomicrobia	1	Subdivision3	1					Subdivision3_genera_incertae_sed	1			AACGAACGCTGGCGGCGTGGATAAGACATGCAAGTCGAACGCTGATTTTAGGGTAGCAATATTCTGAAGTCGGAGTGGCGCAAGGGTGCGTAACACGTGGGTAATTTGCCAAGAAGTTTGGGATAACTCGCTGAAAGGCGAGCTAATACCGGATGTGATGTTTGGGAGGCATCTCCTGAACCTTAAAGCTGGGGACCGCAAGGCCTGGCGCTTCTTGATAAGCCCGCGGCCTATCAGCTAGTTGGTGAGGTAACGGCTCACCAAGGCTAAGACGGGTAGCTGGTCTGAGAGGACGACCAGCCTCACTGGAACTGAGATACGGTCCAGACACCTACGGGTGGCAGCAGTCGAGAATTtttCTCAATGGGCGAAAGCCTGAAGGAGCGACGCCGCGTGGgg…
OTU_53	0	0	0	0	0	0	0	0	0	0	0	0	0	0	0	0	0	0	0	1	0	0	0	0	0	1	0	0	0	0	Bacteria	1	Bacteroidetes	1	Bacteroidetes_incertae_sedis	0.88					Ohtaekwangia	0.88			GATGAACGCTAGCGGCAGGCCTAATACATGCAAGACGAGCGGTAAATGTATCAGCAATGGTATATGAGAGCGTCGTAAGGGTGCGTAACACGTATGCAATCTGCCCGGGACTGGAGCATAGCTCGCCGAAAGGCGGATTAACTCTCCATAAGATGGTGGTGTGGCATCAcacaGCCATAAaaaCTACAAAGTGGTCCTGGATGAGCATGCGGATGATTAGCTAGTTGGTAGTGTAACGGACTACCAAGGCGATGATCAATAGGGGAACTGAGAGGTTGATCCcccACACTGGCACTGAGATACGGGCCAGACTCCTACGGGAGGCAGCAGTAGGGAATATTGGACAATGGGTGCAAGCCTGATCCAGCCATGCCGCGTGCAGGAAGAAGGCTTTCTGAG…
OTU_65	0	0	0	0	0	0	0	0	0	0	0	0	0	0	0	0	0	0	0	0	1	1	0	0	0	0	0	0	0	0	Bacteria	1	Proteobacteria	1	Gammaproteobacteria	0.98	Methylococcales	0.46	Methylococcaceae	0.46	Methylococcus	0.41			ATTGAACGCTGGCGGCATGCCTAACACATGCAAGTCGAACGGTAACGCGGgggCAACCCTGGCGACGAGTGGCGGACGGGTGAGTAATACGTAGGAATCTGCCCATTTGTGGgggATAACCCGGCGAAAGCCGGGCTAATACCGCATACGCTCTACGGAGGAAAGCGGgggATCGTAAGACCTCGCGCAAATGGATGAGCCTACGTCGGATTAGCTAGTTGGTAGGGTAACGGCCTACCAAGGCGACGATCCGTAGCTGGTCTGAGAGGACGATCAGCCACACTGGGACTGAGACACGGCCCAGACTCCTACGGGAGGCAGCAGTGGGGAATATTGGACAATGGgggCAACCCTGATCCAGCAATGCCGCGTgtgtgAAGAAGGCCTGCGGGTTGTAAA…
OTU_66	0	0	0	0	0	0	0	0	0	0	0	0	0	0	0	0	0	0	0	0	0	0	2	0	0	0	0	0	0	0	Bacteria	1	Actinobacteria	1	Actinobacteria	1	Solirubrobacterales	0.86	Solirubrobacteraceae	0.56	Solirubrobacter	0.56			GACGAACGCTGGCGGCGTGCTTAACACATGCAAGTGGTGCGACGAACCAGGGCTTGCCCTGGGGCTAAGCCGCGAACGGGTGAGTAACACGTGAGTAATCTGCCCCGATGACCGGGACAACCCGAGGAAACTCGGGCTAATACCGGATGTGGTGCACGGGTATAAGCCTGTGTACTAAAGGAAGCTTCGGCCTCCGCATTGGGAGGAGCTCGCGGCCCATTAGCTTGTTGGTGGGGTAACGGCCTACCAAGGCAACGATGGGTAGCTGGTCTGAGAGGACGATCAGCCACACTGGGACTGAGACACGGCCCAGACTCCTACGGGAGGCAGCAGTGGGGAATCTTGCGCAATGCGCGAAAGCGTGACGCAGCAACGCCGCGTGGgggAAGACGGCCTTCG…
OTU_67	0	0	0	0	0	0	0	0	0	0	0	0	0	0	0	0	0	0	0	0	0	0	0	1	0	1	0	0	0	0	Bacteria	1	Proteobacteria	1	Betaproteobacteria	1	Rhodocyclales	0.66	Rhodocyclaceae	0.66	Sulfuritalea	0.34			ATTGAACGCTGGCGGAATGCTTTACACATGCAAGTCGAGCGGCAGCGCGGgggCAACCCTGGCGGCGAGCGGCGAACGGGTGAGTAATACATCGGAACATGTCCAGTTGTGGgggATAGCCCGGCGAAAGCCGGATTAATACCGCATGAGCTCGAgagagGAAAGCGGgggACCGTAAGGCCTCGcgcgACTGGGTTGGCCGATGTCCGATTAGCTAGTTGGTGGGGTAAAGGCCTACCAAGGCGATGATCGGTAGCTGGTCTGAGAGGATGATCAGCCACACTGGGACTGAGACACGGCCCAGACTCCTACGGGAGGCAGCAGTGGGGAATTTTGGACAATGGgggAAACCCTGATCCAGCCATTCCGCGTGAGTGAAGAAGGCCTTCGGGTTGTAAA…
OTU_70	0	0	0	0	0	0	0	0	0	0	0	0	0	0	0	1	0	0	0	0	0	0	0	0	0	1	0	0	0	0	Bacteria	1	Bacteroidetes	1	Sphingobacteria	1	Sphingobacteriales	1	Chitinophagaceae	1	Terrimonas	1			GATGAACGCTAGCGGCAGGCTTAATACATGCAAGTCGTGGGGCAGCATGACTGTAGCAATACAGTTGATGGCGACCGGCAAACGGGTGCGGAACACGTACACAACCTTCCTTTTAGTGGAGAATAGCCCAGGGAAACTTGGATTAATACTCCGTAACATATAGAAGTGGCATCACTTTTATATTATAGCAGCAATGCGCTAGAAGATGGGTGTGCGGCTGATTAGATAGTTGGCGGGGTAACGGCCCACCAAGTCGACGATCAGTAACTGGTGTGAGAGCACGACCAGTCACACGGGCACTGAGACACGGGCCCGACTCCTACGGGAGGCAGCAGTAAGGAATATTGGTCAATGGACGCAAGTCTGAACCAGCCATGCCGCGTGGAGGATGAAGGTCCT…
OTU_76	0	0	0	0	0	0	0	0	0	0	0	0	0	0	0	1	0	1	0	0	0	0	0	0	0	0	0	0	0	0	Bacteria	1	Bacteroidetes	1	Bacteroidetes_incertae_sedis	0.45					Ohtaekwangia	0.45			GATGAACGCTAGCGGCAGGCCTAATACATGCAAGCTGAACGGTAACTTTTGTAGCAATACAGAAGCAAGAGTAGCGTAAGGGTGCGTAACACGTATGCAATCTGCCCTTAACTGGCGGATAGCTCCCCGAAAGGGGAATTAACCCGCCATAGGAACTGGAAGTGGCATCACTTCTTttttAAAACTCCGGTGGTTAAGGATGAGCATGCGGCTGATTAGTTAGTTGGCGGGGTAACGGCCCACCAAGACAATGATCAGTAGGGGAACTGAGAGGTTGGTCCcccACACTGGCACTGAGATACGGGCCAGACTCCTACGGGAGGCAGCAGTAGGGAATATTGGACAATGGGTGCAAGCCTGATCCAGCCATGCCGCGTGCAGGAAGAAAGCCTTCTGGGT…
OTU_77	0	0	0	0	0	0	0	0	0	0	0	0	0	0	0	0	0	0	0	0	1	0	0	0	1	0	0	0	0	0	Bacteria	1	Bacteroidetes	1	Bacteroidetes_incertae_sedis	1					Ohtaekwangia	1			GATGAACGCTAGCGGCAGGCTTAATACATGCAAGTCGAACGGTAAGTTGAATAGCAATATTTGACCTAGAGTGACGTACGGGTGCGTAACACGTATGCAACCTACCCAAAACTGGAGGATAGCTCGGGGAAACTCGAATTAACCCTCCATAAGATCATAGAGTAGCATTACTTAGTGATTAAAACTCCGGTGGTTTTGGATGGGCATGCGTCTGATTAGTTAGTTGGCGGGGTAACGGCCCACCAAGACGATGATCAGTAGGGGAACTGAGAGGTTGATCCcccACACTGGCACTGAGATACGGGCCAGACTCCTACGGGAGGCAGCAGTAGGGAATATTGGTCAATGGATGCAAGTCTGAACCAGCCATGCCGCGTGCAGGAAGAAGGCGTTATGCGT…
OTU_125	0	0	0	0	0	0	0	0	0	0	0	0	0	0	0	0	0	0	0	0	0	0	0	0	0	0	1	0	0	0	Bacteria	1	WS3	0.3							WS3_genera_incertae_sedis	0.3			AACGAACGCTGGCGGCGTGGATTAGGCATGCAAGTCGAACGTGAAAGTACTGACGTAGCAATACGAAGGTGCGAGTAAAGTGGCGAACGGGTGAGTAACGCGTGGGAAATCTGCTCTAGAGTGGgggATAACAGTTCTAACGGACTGCTAATACCGCATGATGCCATGGGTCGCATGATTTCATGGTTGAAGGAGGCCTCTGTTTCAAGCTTTCGCTCTAGAATGATCCCGCGTTCTATTAGCTTGTTGGTGGGGTAACGGCCTACCAAGGCGACGATGGATAGCCGGCCTGAGAGGGTGGTCGGCCACACTGGGACTGAGATACGGCCCAGACTCCTACGGGAGGCAGCAGTCGAGAGGCTTCGGCAATGGgggAAACCCTGACCGAGCGACGCCGCG…
OTU_148	0	0	0	0	0	0	0	0	0	0	0	0	0	0	0	0	0	0	0	0	0	0	0	0	0	0	1	0	0	0	Bacteria	1	Proteobacteria	1	Gammaproteobacteria	1	Xanthomonadales	1	Xanthomonadaceae	1	Lysobacter	1			AGTGAACGCTGGCGGCAGGCCTAACACATGCAAGTCGAACGGCAGCACAGCAGTAGCAATACTGTGGGTGGCGAGTGGCGGACGGGTGAGGAATGCATCGGAATCTGCCTATTTGTGGgggATAACGTAGGGAAACTTACGCTAATACCGCATACGTCCTACGGGAGAAAGTGGgggACCTTCGGGCCTCACGCAGATAGATGAGCCGATGCCGGATTAGCTAGTTGGCGGGGTAAAGGCCCACCAAGGCGACGATCCGTAGCTGGTCTGAGAGGATGATCAGCCACACTGGAACTGAGACACGGTCCAGACTCCTACGGGAGGCAGCAGTGGGGAATATTGGACAATGGGCGCAAGCCTGATCCAGCCATGCCGCGTgtgtgAAGAAGGCCTTCGGGT…
OTU_150	0	0	0	0	0	0	0	0	0	0	0	0	0	0	0	0	0	0	0	0	0	0	0	0	0	0	0	1	0	0	Bacteria	1	Firmicutes	0.4	Bacilli	0.4	Bacillales	0.4	Pasteuriaceae	0.4	Pasteuria	0.4			AATGAACGTTGGCGGCGTGGATTAGGCATGCAAGTCGAGCGAGAAGAGTTTGGTAGCTTGCTATTGAACTCGGACAGCGGCGAAAGGGAGAGTAACGCGTAGTTATGTACCCAGGGGTTCGGAATAGCCACGGGAAACTGTGGGTAATGCCGAATAACATCTCCGGATCAAAGGTGTGATTCCGCCCTTGGAGCAGACTGCGTCCTACTAGCTAGTTGGCGGGGTAATGGCCCACCAAGGCAACAATGGGTAGCGGGTGTGAGAGCATGACCCGTCTCACTGGGACTGAGACACTGCCCAGACACCTACGGGTGGCTGCAGTCGAGAATCTTCGGCAATGGGCGAAAGCCTGACCGAGCGACGCCGCGTGCGGGATGAAGGCCCTCGGGTTGTAAACCG…
OTU_151	0	0	0	0	0	0	0	0	0	0	0	0	0	0	0	0	0	0	0	0	0	0	0	0	0	0	0	1	0	0	Bacteria	1	Firmicutes	0.52	Bacilli	0.33	Bacillales	0.3	Thermoactinomycetaceae 1	0.15	Thermoflavimicrobium	0.08			AACGAACGCTGGCGGCGTGCTTAATACATGCAAGTCGAGCGAGAACGAGTCCTTCGGGGCTCTAGTAAAGCGGCGAACGGGTGCGTAACACGTGGGCAACCTGCCTACCGGTCTGGGATAAGCCTTCGAAAGGgggTCTAATACCAGATGACATTCAGAAGGGACATCCCTTTTGACTCAAAGACGGTGAAAGCCGTTGCCGATAGATGGGCCCGCGGCCCATTAGCTAGTTGGTAGGGTAATGGCCTACCAAGGCTTCGATGGGTAGCCGACCTGAGAGGGTGACCGGCCACACTGGGACTGAGATACGGCCCAGACTCCTACGGGAGGCAGCAGTAGGGAATATTGCGCAATGGgggAAACCCTGACGCAGCAACGCCGCGTGGATGATGAAGCTCT…
OTU_162	0	0	0	0	0	0	0	0	0	0	0	0	0	0	0	0	0	0	0	0	0	0	0	1	0	0	0	0	0	0	Bacteria	1	Bacteroidetes	1	Sphingobacteria	1	Sphingobacteriales	1	Chitinophagaceae	1	Filimonas	0.46			GATGAACGCTAGCGGCAGGCTTAATACATGCAAGTCGTGGGGCAGCACAAATAGCAATATTGGGTGGCGACCGGCAAACGGGTGCGTAACACGTACGCAACCTTCCCGTTACTGGGGAATAGCCCAGGGAAACTTGGATTAATACCCCATATTAtataGATCAGGCATCTGGTTTATATCAAAGCTTCGGCGGTAACGGATGGGCGTGCGGTTGATTAGGTAGTTGGCGGGGTAACGGCCCACCAAGCCTACGATCAATAGCTGATGTGAGAGCATGATCAGCCACACGGGCACTGAGACACGGGCCCGACTCCTACGGGAGGCAGCAGTAAGGAATATTGGGCAATGGACGCAAGTCTGACCCAGCCATGCCGCGTGAAGGATGAAGGTCCTCTGGAT…
OTU_167	0	0	0	0	0	0	0	0	0	0	0	0	0	0	0	0	0	0	0	0	1	0	0	0	0	0	0	0	0	0	Bacteria	1	Acidobacteria	1	Acidobacteria_Gp6	1					Gp6	1			AATCAACGCTGGCGGCGTGCCTAACACATGCAAGTCGAACGCGGTTACTGCTGTTCCGCAAGGAATAGTGGTAACTGAGTGGCGAACGGGTGAGTAACACGTGGGTGACCTACCTTCGAGTGGgggATAACGTCCCGAAAGGGACGCTAATACCGCATAACATCCTGCCTTTGAACAGGCGGAGATCAAAGCCGGGGATCGCAAGACCTGGCGCTTGATGAGGGGCCCGCGTCCGATTAGCTAGTTGGTGAGGTAATGGCTCACCAAGGCAACGATCGGTAGCCGGCCTGAGAGGGCGGACGGCCACACTGGGACTGAGACACGGCCCAGACTCCTACGGGAGGCAGCAGTGGGGAATTGTTCACAATGGGCGCAAGCCTGATGACGCAACGCCGCGTG…
OTU_184	0	0	0	0	0	0	0	0	0	0	0	0	0	0	0	1	0	0	0	0	0	0	0	0	0	0	0	0	0	0	Bacteria	1	Bacteroidetes	1	Sphingobacteria	1	Sphingobacteriales	1	Chitinophagaceae	1	Terrimonas	0.88			GATGAACGCTAGCGGCAGGCTTAATACATGCAAGTCGAGGGGCAGCGCAGTGTAGCAATACATGGGCGGCGACCGGCAAACGGGTGCGGAACACGTACAGAACCTTCCTTCGAGCGGGGAATAGCCCAGAGAAATTTGGATTAATACCCCATAGTATTGCAGAGTGGCATCACTTTGCAATTAAAGATTTATCACTTGAAGATGGCTGTGCGGCTGATTAGGTAGTTGGCGGGGTAACGGCCCACCAAGCCTGCGATCAGTAACTGGTGTGAGAGCACGACCAGTCACACGGGCACTGAGACACGGGCCCGACTCCTACGGGAGGCAGCAGTAAGGAATATTGGTCAATGGACGCAAGTCTGAACCAGCCATGCCGCGTGGAGGATGAAGGTCCTCTGG…
OTU_185	0	0	0	0	0	0	0	0	0	0	0	0	0	0	0	0	0	0	0	0	0	0	1	0	0	0	0	0	0	0	Bacteria	1	Spirochaetes	0.89	Spirochaetes	0.89	Spirochaetales	0.89	Spirochaetaceae	0.84	Spirochaeta	0.84			AACGAACGCTGGCGGCACGTTTTAAGCATGCAAGTCGAACGGCAGTGGgggCTTGCTCCCATGAGAGTGGCGAACGGGTGAGTAACACGTAGGTGATCTGCCTTGAGGATGGGGATAGCTTGTGGAAACACAGGGTAATACCGAATGAGCTGACAGGATTTTGGTCCAGTTAGTAAAGGTGCTACGGCACCGCCTTAAGAGGAGCCTGCGGCTGATTAGCTAGTTGGTGGGGTAAAGGCCTACCAAGGCGACGATCAGTAGCCGGCCTGAGAGGGTGTACGGCCACACTGGAACTGAGACACGGTCCAGACTCCTACGGGAGGCAGCAGCTAAGAATCTTCCGCAATGGGCGAAAGCCTGACGGAGCGATGCCGCGTGATCGATGAAGGTCGAgagaTT…
OTU_190	0	0	0	0	0	0	0	0	0	0	0	0	0	0	0	0	0	1	0	0	0	0	0	0	0	0	0	0	0	0	Bacteria	1	Verrucomicrobia	1	Subdivision3	1					Subdivision3_genera_incertae_sed	1			AACGAACGCTGGCGGCGTGGATAAGACATGCAAGTCGAGCGCTGATTCTGGTGTAGCAATatatCAGAGTTGGAGCGGCGCAAGGGTGCGTAACACGTGGGTAATTTGCCATGAAGTTGGGGATAACTCGCTGAAAGGCGAGCTAATACCGGATGTGGTTTCGAAGTGGCATCACTTTGCAACTAAAGCTGGGGATCGTAAGACCTGGCGCTTCATGATAAGCCCGCGGCCTATCAGCTAGTTGGTGAGGTAACGGCTCACCAAGGCTAAGACGGGTAGCTGGTCTGAGAGGACGACCAGCCACACTGGAACTGAGACACGGTCCAGACACCTACGGGTGGCAGCAGTCGAGAATTtttCTCAATGGGCGCAAGCCTGAAGGAGCGACGCCGCGTGGgg…
OTU_215	0	0	0	0	0	0	0	0	0	0	0	0	0	0	0	0	0	0	0	0	0	0	0	0	0	1	0	0	0	0	Bacteria	1	Bacteroidetes	1	Sphingobacteria	1	Sphingobacteriales	1	Chitinophagaceae	1	Flavitalea	0.51			GATGAACGCTAGCGGCAGGCTTAATACATGCAAGTCGTGGGGCAGCACAGGTAGCAATACTGGGTGGCGACCGGCAAACGGGTGCGGAACACGTACGCAACCTTCCTTTAAGTGGgggATAGCCCAGGGAAACTTGGATTAATACCCCTTAACATTATGAGATGGCATCATTTTATAATTAAAGCTCCGGCGCTTAAAGATGGGCGTGCGCCTGATTAGGTAGTTGGCGGGGTAACAGCCCACCAAGCCTACGATCAGTAACTGGTGTGAGAGCACGACCAGTCACACGGGCACTGAGACACGGGCCCGACTCCTACGGGAGGCAGCAGTAAGGAATATTGGTCAATGGACGCAAGTCTGAACCAGCCATGCCGCGTGGAGGATGACGGCCCTCTGGGT…
OTU_224	0	0	0	0	0	0	0	0	0	0	0	0	0	0	0	0	0	0	0	1	0	0	0	0	0	0	0	0	0	0	Bacteria	1	Actinobacteria	0.98	Actinobacteria	0.98	Solirubrobacterales	0.69	Solirubrobacteraceae	0.36	Solirubrobacter	0.36			GACGAACGCTGGCGGCGTGCTTAACACATGCAAGTGGTGCGACGAACCAGACTTCGGTCTGGGGCAAAGCCGCGAACGGGTGAGTAACACGTGAGTAATCTGCCCCGATGACCGGGACAACCCGAGGAAACTCGGGCTAATACCGGATGATGAGCCTTGGCGTAAGCCTTGTCTCTAAAGGAAGCTTCGGCCTCCGCATCGGGAGGAGCTCGCGGCCCATTAGCTTGTTGGTGGGGTAATGGCCTACCAAGGCAACGATGGGTAGCTGGTCTGAGAGGACGATCAGCCACACTGGAACTGAGACACGGTCCAGACTCCTACGGGAGGCAGCAGTGGGGAATCTTGCGCAATGCGCGAAAGCGTGACGCAGCAACGCCGCGTGGgggAAGACGGCCTTCG…
OTU_249	0	0	0	0	0	0	0	0	0	0	0	0	0	0	0	0	0	0	0	0	0	1	0	0	0	0	0	0	0	0	Bacteria	1	Proteobacteria	0.95	Deltaproteobacteria	0.95	Desulfobacterales	0.33	Desulfobacteraceae	0.23	Desulfatiferula	0.16			AACGAACGCTGGCGGCGTGCCTAACACATGCAAGTCGAACGAGAAAGGGGCTTCGGCTCCGAGTAAAGTGGCGCACGGGTGAGTAACACGTAGGTAACCTGCCTCTAAGATTGGGATAACTTGTCGAAAGACGAGCTAATACCAAATAAGACCACGGTCTCCTCGGAGACAGAGGTCAAAGGTAGCCTCTATTTATACGCTATCGCTAAGAGATGGGCCTGCGTACCATTAGCTAGTTGGTGAGGTAACGGCTCACCAAGGCAAAGATGGTTAGCTGGTCTGAGAGGATGATCAGCCACACTGGAACTGAGACACGGTCCAGACTCCTACGGGAGGCAGCAGTGGGGAATATTGCGCAATGGGCGAAAGCCTGACGCAGCAACGCCGCGTGAGTGATGA…
OTU_252	0	0	0	0	0	0	0	0	0	0	0	0	0	0	0	0	0	0	0	0	0	0	1	0	0	0	0	0	0	0	Bacteria	1	Verrucomicrobia	0.99	Subdivision3	0.96					Subdivision3_genera_incertae_sed	0.96			AACGAACGCTGGCGGCGTGGATAAGACATGCAAGTTGAACGCTTATTCCGGTGTAGCAATACAGCGGAGTGGGAGTAGCGCAAGGGTGCGTAACACGTGGGTAATTTGCCATGAAGTTGGGGATAACTCGCTGAAAGGCGAGCTAATACCGGATGTGGTTATCGGGTGGCATCATCTGATAACTAAAGGTGGGGATCGCAAGACCTGCCGTTTCATGATAAGCCCGCGGCCTATCAGCTAGTTGGTGAGGTAACGGCTCACCAAGGCTAAGACGGGTAGCTGGTCTGAGAGGACGACCAGCCACACTGGAACTGAGACACGGTCCAGACACCTACGGGTGGCAGCAGTCGAGAATTtttCTCAATGGGCGCAAGCCTGAAGGAGCGACGCCGCGTGGgg…
OTU_57	0	0	0	0	0	0	0	0	0	0	0	0	0	0	0	0	0	0	0	0	0	0	0	0	0	1	0	0	0	0	Bacteria	1	Bacteroidetes	1	Bacteroidetes_incertae_sedis	0.57					Ohtaekwangia	0.57			GATGAACGCTAGCGGCAGGCCTAATACATGCAAGCCGAACGGCAAGATTTTCAGCAATGGAGATCCTAGAGTGGCGTAAGGGTGCGTAACACGTATGCAATCTGCCCTCAACAGGAGGATAGCTCCCCGAAAGGGGAATTAAGACTTCATAGGATCGTAGGGAGGCATCTTCCAGCGATTAAATTACAAGAGGTTGAGGATGAGCATGCGCATGATTAGTTAGTTGGCGGGGTAACGGCCCACCAAGACGATGATCATTAGGGGAACTGAGAGGTTGATCCcccACACTGGCACTGAGATACGGGCCAGACTCCTACGGGAGGCAGCAGTAGGGAATATTGGACAATGGGTGCGAGCCTGATCCAGCCATGCCGCGTGCAGGAAGAAAGCCTTCTGGGT…
OTU_59	0	0	0	0	0	0	0	0	0	0	0	0	0	0	0	0	0	0	0	0	0	0	0	1	0	0	0	0	0	0	Bacteria	0.99	Planctomycetes	0.48	Phycisphaerae	0.37	Phycisphaerales	0.37	Phycisphaeraceae	0.37	Phycisphaera	0.37			AACGAACGCTGGCGGCATGGTTAAGACATGCAAGTCGAACGGACCATGTAGCAATatatGGTTAGTGGCGAAAGGGAGAGTAATCCATAGGTAATGTACCCTTAACACCGGGATAACGCCGGgggCAACCCCTTTGCGAAAGTGGCGCTAATACCGGATGAAGTTGCCGGGCGGCATCGCCTGGCACCCAAAGGGCGGGGATCGTAAGACCTGCCGGTTTTGGAGCAGCCTATGTCCTATCACCTAGTTGGCGAGGTAACGGCTCACCAAGGGAGCGACGGGTAGCGGGTGTGAGAGCATGACCCGCCTCATCGGAACTGAGACACTGTCCGGACACCTACGGGTGGCTGCAGTAACGAATATTGGGCAATGGGCGCAAGCCTGACCCAGCAATGCCGC…
OTU_62	0	0	0	0	0	0	0	0	0	0	0	0	0	0	0	1	0	0	0	0	0	0	0	0	0	0	0	0	0	0	Bacteria	1	Acidobacteria	1	Acidobacteria_Gp6	1					Gp6	1			AATCAACGCTGGCGGCGTGCCTAACACATGCAAGTCGAACGCGAAAGTGGAGCAATCCATGAGTAGAGTGGCGAACGGGTGAGTAACGCGTGGGTGACCTACCTCTGAGTGGgggATAACGTCCCGAAAGGGACGCTAATACCGCATAACATCCTGCCTTTGAACAGGCGGTGATCAAAGCCGGGGATCGCAAGACCTGGCGCTTGAAGAGGGGCCCGCGTCCGATTAGCTAGTTGGTGAGGTAACGGCTCACCAAGGCGACGATCGGTATCCGGCCTGAGAGGGCGGACGGACacacTGGGACTGAGACACGGCCCAGACTCCTACGGGAGGCAGCAGTGGGGAATTGTTCACAATGGGCGCAAGCCTGATGACGCAACGCCGCGTGGAGGATGAAGG…
OTU_69	0	0	0	0	0	0	0	0	0	0	0	0	0	0	0	0	0	0	0	0	0	0	0	0	0	1	0	0	0	0	Bacteria	1	Proteobacteria	1	Deltaproteobacteria	1	Myxococcales	1	Phaselicystidaceae	0.61	Phaselicystis	0.61			AACGAACGTTAGCGGCgcgcCTAATACATGCAAGTCGTGCGAGAAAGGGCTTCGGCCCCGGTAAAGCGGCGCACGGGTGAGTAACACGTAGGTCATCTCCCCTCGAGTGGTGGATAACCCTCCGAAAGGAGGACTAATACAGCATAAGACCACGACCTCGTTGAGGTTGCGGTCAAAGCAGGCCACTACATGTAAGCTTGCGCTTGAGGATGAGTCTGCGGCCCATCAGCTAGTTGGTAAGGTAATGGCTTACCAAGGCTAAGACGGGTAGCTGGTCTGAGAGGATGAACAGCCACACTGGAACTGAAACACGGTCCAGACTCCTACGGGAGGCAGCAGTAGGGAATCTTGCGCAATGGACGAAAGTCTGACGCAGCGACGCCGCGTGAGCGATGAAGG…
OTU_72	0	0	0	0	0	0	0	0	0	0	0	0	0	0	0	0	0	1	0	0	0	0	0	0	0	0	0	0	0	0	Bacteria	1	Planctomycetes	0.43	Phycisphaerae	0.43	Phycisphaerales	0.43	Phycisphaeraceae	0.43	Phycisphaera	0.43			AACGAACGCTGGCGGCATGGCTAAGACATGCAAGTCGTACGGTATGTAGTAGCAATATTGCATACAGTGGCGAACGGGTGAGTACAAAATAGGTAACGTACCATGGACTCAGGGATAACCCCGGGAGCTTGCTCCCTTTGCGAAAGTGGGATTAATACCTGATGAAGTCGCGACGCGGCATCACGTTGCGATCAAAACCGGGGACCGCAAGGCCTGGTGGTCTTTGATCGGCCTATTTCCTATCAGCTAGTTGGTGAGGTAACGGCTCACCAAGGCAACGACGGGTAGCCGGACTGAGAGGTTGTACGGCCACATCGGGACTGAGACACTGCCCGGACATCTACGGATGGCTGCAGTAACGAATCTTCCGCAATGGGCGAAAGCCTGACGGAGCAATGC…
OTU_74	0	0	0	0	0	0	0	0	0	0	0	0	0	0	0	0	0	0	0	0	0	0	0	0	0	1	0	0	0	0	Bacteria	1	Acidobacteria	1	Acidobacteria_Gp4	1					Gp4	1			AATCAACGCTGGCGGCGTGCCTCAGACATGCAAGTCGAACGCGAAAGGTTCCTTCGGGAACTGATTAGAGTGGCGCACGGGTGAGTAACACGTAGGTAATTTACCTTTGGGTGGGGAATAACAGTCGGAAACGACTGCTAATACCGCATAATGCAGCGGCTCGACATCGAGACAGTTGTTAAAGCGGgggATCGCAAGACCTCGCGCCTGAAGAGAAGCCTGCGGCAGATTAGCTTGTTGGTAGGGTAATGGCCTACCAAGGCGACGATCTGTAGCCGGCCTGAGAGGGCGGTCGGCCACACTGACACTGAATAACGGGTCAGACTCCTACGGGAGGCAGCAGTCGGGAATTTTGGGCAATGGGCGAAAGCCTGACCCAGCAACGCCGCGTGAAGGATG…
OTU_79	0	0	0	0	0	0	0	0	0	0	0	0	0	0	0	0	0	0	0	1	0	0	0	0	0	0	0	0	0	0	Bacteria	1	Proteobacteria	1	Betaproteobacteria	0.92	Rhodocyclales	0.27	Rhodocyclaceae	0.27	Sulfuritalea	0.17			ATTGAACGCTGGCGGCATGCCTTACACATGCAAGTCGAGCGGCAGCGCGGgggCAACCCTGGCGGCGAGCGGCGAACGGGTGAGTAATGCATCGGAACGTGTCCTCTTGTGGgggATAACCAGTCGAAAGACTGGCTAATACCGCATGAGCTCGAgagagGAAAGCAGGGGATCCGCAAGGACCTTGCGCGAGAGGAGCGGCCGATGCCCGATTAGCTAGTTGGTGGGGTAACGGCCTACCAAGGCGACGATCGGTAGCTGGTCTGAGAGGACGACCAGCCACACTGGGACTGAGACACGGCCCAGACTCCTACGGGAGGCAGCAGTGGGGAATTTTGGACAATGGgggCAACCCTGATCCAGCCATGCCGCGTgtgtgAAGAAGGCCTTCGGGTTGTA…
OTU_82	0	0	0	0	0	0	0	0	0	0	0	0	0	0	0	0	0	0	0	1	0	0	0	0	0	0	0	0	0	0	Bacteria	1	Acidobacteria	1	Acidobacteria_Gp6	1					Gp6	1			AATCAACGCTGGCGGCGTGCCTAACACATGCAAGTCGAACGCGAAAATCCCGCAAGGGATGAGTAGAGTGGCAAACGGGTGAGTAACGCGTGGGTGACCTGCCTTCGAGCGGgggATAACGTTCCGAAAGGGACGCTAATACCGCATAACATCCTGCCTTTGAAGAGGCGGTGATCAAAGCTGGGGATCGCAAGACCTAGCACTTGAAGAGGGGCCCGCGTCCGATTAGCTAGTTGGTGGGGTAATGGCTCACCAAGGCAACGATCGGTAGCCGGCCTGAGAGGGCGGACGGCCACACTGGGACTGAGACACGGCCCAGACTCCTACGGGAGGCAGCAGTGGGGAATTGTTCGCAATGGGCGCAAGCCTGACGACGCAACGCCGCGTGGAGGATGAAGA…
OTU_84	0	0	0	0	0	0	0	0	0	0	0	0	0	0	0	0	0	0	1	0	0	0	0	0	0	0	0	0	0	0	Bacteria	1	Acidobacteria	1	Acidobacteria_Gp6	1					Gp6	1			AATCAACGCTGGCGGCGTGCCTAACACATGCAAGTCGAACGCGAAGACCCCGCAAGGGGTTGTTAGCGTGGCAAACGGGTGAGTAACGCGTGGGCGACCTACCTCAGAGTGGgggATAACCTTCCGAAAGGGAGGCTAATACCGCATGACATGCCTTGTTTAGATACAGGGACATCAAAGCCGGGGATCGTAAGACCTGGCGCTTGGAGAGGGGCCCGCGTCCGATTAGCTAGTTGGTGGGGTAACGGCTCACCAAGGCTCCGATCGGTATCCGGCCTGAGAGGGCGGACGGACacacTGGAACTGAGACACGGTCCAGACTCCTACGGGAGGCAGCAGTGGGGAATTGTTCGCAATGGGCGAAAGCCTGACGACGCAACGCCGCGTGGAGGATGAAGA…
OTU_85	0	0	0	0	0	0	0	0	0	0	0	0	0	0	0	0	0	0	0	0	0	0	0	0	0	1	0	0	0	0	Bacteria	1	Acidobacteria	1	Acidobacteria_Gp6	1					Gp6	1			AATCAACGCTGGCGGCGTGCCTAACACATGCAAGTCGAACGCGAAGACCCCGCAAGGGGTTGTTAGCGTGGCAAACGGGTGAGTAACGCGTGGGCGACCTACCTCAGAGTGGgggATAACCTTCCGAAAGGGAGGCTAATACCGCATGACATCCCGTGTTTAGATACACGGTGATCAAAGCCGGGGATCGCAAGACCTGGCGCTTGGAGAGGGGCCCGCGTCCGATTAGCTAGTTGGTGAGGTAATGGCTCACCAAGGCTCCGATCGGTATCCGGCCTGAGAGGGCGGACGGACacacTGGGACTGAGACACGGCCCAGACTCCTACGGGAGGCAGCAGTGGGGAATTGTTCGCAATGGGCGCAAGCCTGACGACGCAACGCCGCGTGGAGGATGAAGG…
OTU_86	0	0	0	0	0	0	0	0	0	0	0	0	0	0	0	0	0	0	0	0	0	0	0	0	0	0	0	1	0	0	Bacteria	1	Bacteroidetes	1	Bacteroidetes_incertae_sedis	1					Ohtaekwangia	1			GATGAACGCTAGCGGCAGGCCTAATACATGCAAGACGAACGGTAAGAATTGTAGCAATATGATTCCAAGAGTGTCGTACGGGTGCGTAACACGTATGCAACCTACCTTGTACAGGAGTATAGCTCGGGGAAACTCGAATTAACCCTCCATAATATAATCGGATGGCATCATTTGATTATTAAAACTACGGTGGTACAAGATGGGCATGCGTTTGATTAGCTAGTTGGCGGTGTAATGGACCACCAAGGCGATGATCAATAGGGGAACTGAGAGGTTGATCCcccACACTGGCACTGAGATACGGGCCAGACTCCTACGGGAGGCAGCAGTAGGGAATATTGGTCAATGGATGGAAGTCTGAACCAGCCATGCCGCGTGCAGGAAGAAGGCCTTCTGGGT…
OTU_87	0	0	0	0	0	0	0	0	0	0	0	0	0	0	0	0	0	0	1	0	0	0	0	0	0	0	0	0	0	0	Bacteria	1	Bacteroidetes	0.99	Flavobacteria	0.3	Flavobacteriales	0.3	Flavobacteriaceae	0.27	Coenonia	0.12			GATTAACGCTAGCGGCAGGCCTAATACATGCAAGTTGTACGGGATTATTGGTAGCAATACTGATATGAGAGTAGCGCACGGGTGCGTAACACGTATGCAACCTACCTTTAACTGGGGAATAGCTCACCGAAAGGTGAATTAACACCGCATAAAATCACAGAAGGACATCCTTTAATGATTAAATCTCCGGAGGTTAAAGATGGGCATGCGTCCGATTAGCTAGTTGGCGGGGTAATAGCCCACCAAGGCAACGATCGGTAGGgggTCTGAGAGGATGATCCcccACACTGGTACTGAGACACGGACCAGACTCCTACGGGAGGCAGCAGTAAGGAATATTGGACAATGGgggCAACCCTGATCCAGCCATGCCGCGTGAAGGATGAAGGCCCTCTGGGT…
OTU_90	0	0	0	0	0	0	0	0	0	0	0	0	0	0	0	0	0	1	0	0	0	0	0	0	0	0	0	0	0	0	Bacteria	1	Verrucomicrobia	1	Subdivision3	1					Subdivision3_genera_incertae_sed	1			AACGAACGCTGGCGGCGTGGATAAGACATGCAAGTCGAGCGCTCACTTCAGGGTAGCAATATTCTGAAGTGGGAGCGGCGCAAGGGTGCGTAACACGTGGGTAATTTGCCGAGAAGTTTGGGATAACTCGCTGAAAGGCGAGCTAATACCGGATGTGATATTTGGGAGGCATCTTCTGAATATTAAAGTTGGGGACCGTAAGGCCTGACGCTTCTTGATAAGCCCGCGGCCTATCAGCTAGTTGGTGAGGTAACGGCTCACCAAGGCTAAGACGGGTAGCTGGTCTGAGAGGACGACCAGCCACACTGGAACTGAGACACGGTCCAGACACCTACGGGTGGCAGCAGTCGAGAATTtttCACAATGGGCGAAAGCCTGATGGAGCGACGCCGCGTGGgg…
OTU_92	0	0	0	0	0	0	0	0	0	0	0	0	0	0	0	0	0	0	0	1	0	0	0	0	0	0	0	0	0	0	Bacteria	1	Acidobacteria	1	Acidobacteria_Gp4	1					Gp4	1			AATCAACGCTGGCGGCGTGCCTCAGACATGCAAGTCGAACGCGAAAGTTCCCTTCGGGGAGCAAGTAGAGTGGCGCACGGGTGAGTAACACGTAGGTAATCTACCTTTGGATGGGGAATAACAACCGGAAACGGTTGCTAATACCGCATAATGCAGCGGCACCTAGTGGTGACAGTTGTTAAAGCGGgggATCGAAAGACCTCGCGTCTGAAGAGGAGCCTGCGGCGGATTAGCTAGTTGGTAAGGTAATGGCTTACCAAGGCGATGATCCGTAACCGGCCTGAGAGGGCGGTCGGTCACACTGACACTGACATACGGGTCAGACTCCTACGGGAGGCAGCAGTCGGGAATTTTGGGCAATGGGCGAAAGCCTGACCCAGCAACGCCGCGTGAAGGATG…
OTU_93	0	0	0	0	0	0	0	0	0	0	0	0	0	0	0	0	0	0	0	0	0	0	0	1	0	0	0	0	0	0	Bacteria	1	Bacteroidetes	1	Bacteroidetes_incertae_sedis	0.96					Ohtaekwangia	0.96			GATGAACGCTAGCGGCAGGCTTAATACATGCAAGACGAACGGTAACTGGTGTAGCAATACACTAGCTAGAGTGTCGTACGGGTGCGTAACACGTATGCAACCTACCTTGTACAGGGGTATAGCTCGGGGAAACTCGAATTAACCccccATAATATGTTGGTGTGGCATCACACTAACATTAAAACTTCGGTGGTACAAGATGGGCATGCGTTTGATTAGTTAGTTGGCAGTGTAATGGACTACCAAGACGATGATCAATAGGGGACCTGAGAGGGTGATCCcccACACTGGCACTGAGATACGGGCCAGACTCCTACGGGAGGCAGCAGTAGGGAATATTGGACAATGGGTGAGAGCCTGATCCAGCCATGCCGCGTGCAGGAAGAAGGCGTTATGCGT…
OTU_99	0	0	0	0	0	0	0	0	0	0	0	0	0	0	0	0	1	0	0	0	0	0	0	0	0	0	0	0	0	0	Bacteria	1	Planctomycetes	0.3	Phycisphaerae	0.29	Phycisphaerales	0.29	Phycisphaeraceae	0.29	Phycisphaera	0.29			AACGAACGCTGGCGGCGTGGCTAAGACATGCAAGTCGTACGATATGTTGTAGCAATATGACATATAGTGGCGGACGGGTGAGTAATGAATAGGTAACGTACCCCGGGCACAGGGATAACGTCGAGTCCCGCAAGGGATTCTTTGCGAAAGTGACGGTAATACCTGGTGAAGTCTTTGGGTGGCATCATTCGAAGACCATAAGGTGGGGACCTTTGGGCCTACTGGCCTGGGAGCGGCCTATTTCCTATCAGCTAGTTGGTGAGGTAACGGCTCACCAAGGCAACGACGGGTAGCCGGACTGAGAGGTTGTTCGGCCACATCGGGACTGAGACACTGCCCGGACATCTACGGATGGCTGCAGTAACGAATATTCCGCAATGGGCGAAAGCCTGACGGAGC…
OTU_100	0	0	0	0	0	0	0	0	0	0	0	0	0	0	0	0	0	0	0	0	0	0	0	0	0	0	0	0	0	0	Bacteria	1	Proteobacteria	1	Betaproteobacteria	0.87	Burkholderiales	0.48	Comamonadaceae	0.33	Schlegelella	0.29			ATTGAACGCTGGCGGCATGCTTTACACATGCAAGTCGAGCGGCAGCGCGGgggCAACCCTGGCGGCGAGCGGCGAACGGGTGAGGAATGCATCGGAACGTACCCGACAGTGGgggATAACGCCGCGAAAGCGGCGCTAATACCGCATATTCTCTAAGGAGGAAAGCAGGGGACCCGCAAGGGCCTTGCGCTGACGGAGCGGCCGATGTCCGATTAGCTAGTTGGTGGGGTAAAGGCTTACCAAGGCGACGATCGGTAGCTGGTCTGAGAGGATGATCAGCCACACTGGGACTGAGACACGGCCCAGACTCCTACGGGAGGCAGCAGTGGGGAATTTTGGACAATGGgggCAACCCTGATCCAGCCATGCCGCGTGCGGGAAGAAGGCCTTCGGGTTGTA…
OTU_101	0	0	0	0	0	0	0	0	0	0	0	0	0	0	0	0	0	0	0	0	0	0	0	0	0	0	0	0	0	0	Bacteria	1	Proteobacteria	0.99	Deltaproteobacteria	0.99	Myxococcales	0.99	Nannocystaceae	0.49	Nannocystis	0.49			AGCGAACGTTAGCGGCgcgcCTAACACATGCAAGTCGCACGAGAGTGGAGCAATCCATGAAAGTGGCGCACGGGTGCGTAACACGTAGATAATCTGCCCTACGGCGGgggATAACGTTCCGAAAGGAGCGCTAATACCGCATACAGCGTTTGGTGGTTCGCCACTGGACGGCAAAGGCTGGGCCTCGCAAGAGCCAGTCACCGGAGGAGGAGTCTGCGGCCCATCAGCTAGTTGGTAAGGTAATGGCTTACCAAGGCAAAGACGGGTAGCTGGTCTGAGAGGATGATCAGCCACACTGGTACTGGAACACGGACCAGACTCCTACGGGAGGCAGCAGTGGGGAATCTTGGTCAATGGGCGCAAGCCTGAACCAGCGACGCCGCGTGAGTGATGAAGGCC…
OTU_107	0	0	0	0	0	0	0	0	0	0	0	0	0	0	0	0	0	0	0	0	0	0	0	0	0	0	0	0	0	0	Bacteria	1	Bacteroidetes	1	Sphingobacteria	1	Sphingobacteriales	1	Chitinophagaceae	1	Flavisolibacter	0.84			GATGAACGCTAGCGGCAGGCTTAATACATGCAAGTCGTGGGGCAGCAGGGCTGTAGCAATACAGTCGCTGGCGACCGGCAAACGGGTGCGGAACACGTACGCAACCTACCCGAAACTGGgggATAGCCCGGGGAAACCCGGATTAATACCCCGTAACATATTGAAGTGGCATCACTTTAATATTATAGCTACGGCGGTTTTGGATGGGCGTGCGTCTGATTAGGTAGTTGGTGAGGTAACGGCTCACCAAGCCTGCGATCAGTAACTGGTGTGAGAGCACGACCAGTCACACGGGCACTGAGACACGGGCCCGACTCCTACGGGAGGCAGCAGTAAGGAATATTGGTCAATGGACGCAAGTCTGAACCAGCCATGCCGCGTGGAGGATGAAGGTCCTCT…
OTU_108	0	0	0	0	0	0	0	0	0	0	0	0	0	0	0	0	0	0	0	0	0	0	0	0	0	0	0	0	0	0	Bacteria	0.99	Bacteroidetes	0.99	Bacteroidetes_incertae_sedis	0.45					Ohtaekwangia	0.45			GATGAACGCTAGCGGCAGGCCTAATACATGCAAGCTGAACGGCAAGATTGGTAGCAATACTGATCCTAGAGTAGCGTAAGGGTGCGTAACACGTATGCAATCTGCCCTCAATAGGAGGATAGCTCCCCGAAAGGGGAATTAATACTTCATAGGATCATAGAGTGGCATCACTTAGTGATTAAACTACGGGATTGAGGATGAGCATGCGCATGATTAGTTAGTTGGCGGGGTAACGGCCCACCAAGACGATGATCATTAGGGGAACTGAGAGGTTGATCCcccACACTGGCACTGAGATACGGGCCAGACTCCTACGGGAGGCAGCAGTAGGGAATATTGGACAATGGGTGAGAGCCTGATCCAGCCATGCCGCGTGCAGGAAGAAAGCCTTCTGGGTTG…
OTU_109	0	0	0	0	0	0	0	0	0	0	0	0	0	0	0	0	0	0	0	0	0	0	0	0	0	0	0	0	0	0	Bacteria	1	Actinobacteria	1	Actinobacteria	1	Solirubrobacterales	0.97	Conexibacteraceae	0.96	Conexibacter	0.96			GACGAACGCTGGCGGCGTGCTTAACACATGCAAGTGGAGCGACGAACCCGAGCTTGCTCGGgggCAAAGCCGCGAACGGGTGAGTAACACGTGGGTAATCTGCCCTGTTGATTGGGACAACCCCGGGAAACCGGGGCTAATACCAAATGTGCTCACATCTACATCAGTAGGAGTGAGGAAAGGAGGCTTCGGCTTCCGCAACGGGATGAGCCCGCGGCCCATTAGCTTGTTGGTGGGGTAATGGCCTACCAAGGCTTCGATGGGTAGCTGGTCTGAGAGGACGATCAGCCACACTGGGACTGAGACACGGCCCAGACTCCTACGGGAGGCAGCAGTGGGGAATCTTGCGCAATGCGCGAAAGCGTGACGCAGCAACGCCGCGTGAGGGAAGACGGCCTT…
OTU_110	0	0	0	0	0	0	0	0	0	0	0	0	0	0	0	0	0	0	0	0	0	0	0	0	0	0	0	0	0	0	Bacteria	1	Bacteroidetes	1	Bacteroidetes_incertae_sedis	1					Ohtaekwangia	1			GATGAACGCTAGCGGCAGGCTTAATACATGCAAGTCGAACGGTAAGTGTAGTAGCAATACTATACGAGAGTGACGTACGGGTGCGTAACACGTATGCAACCTACCTTGTACAGGAGGATAGCTCGGGGAAACTCGAATTAACCCTCCATAAGATAGTGGTGAGGCATCTCACAGCTATTAAAACTCAGGTGGTACAAGATGGGCATGCGTCTGATTAGCTAGTTGGCGGTGTAACGGACCACCAAGGCGATGATCAGTAGGGGAACTGAGAGGTTGATCCcccACACTGGCACTGAGATACGGGCCAGACTCCTACGGGAGGCAGCAGTAGGGAATATTGGTCAATGGATGCAAGTCTGAACCAGCCATGCCGCGTGCAGGAAGAAGGCCTTCTGGGTT…
OTU_114	0	0	0	0	0	0	0	0	0	0	0	0	0	0	0	0	0	0	0	0	0	0	0	0	0	0	0	0	0	0	Bacteria	1	Acidobacteria	1	Acidobacteria_Gp6	1					Gp6	1			AATCAACGCTGGCGGCGTGCCTAACACATGCAAGTCGAACGCGAAAGTCCCGCAAGGGATAAGTAGAGTGGCAAACGGGTGAGTAACACGTGGGTGACCTACCTTCGAGTGGgggATAACGTCCCGAAAGGGACGCTAATACCGCATGACATCCTGCCTTTGAAGAGGCGGAGATCAAAGCTGGGGATCGCAAGACCTAGCGCTTGAAGAGGGGCCCGCGCCTGATTAGCTAGTTGGTGGGGTAATGGCTCACCAAGGCGACGATCAGTAGCCGGCCTGAGAGGGCGGACGGCCACACTGGGACTGAGACACGGCCCAGACTCCTACGGGAGGCAGCAGTGGGGAATTGTTCGCAATGGGCGCAAGCCTGACGACGCAACGCCGCGTGGAGGACGAAGA…
OTU_116	0	0	0	0	0	0	0	0	0	0	0	0	0	0	0	0	0	0	0	0	0	0	0	0	0	0	0	0	0	0	Bacteria	1	Bacteroidetes	0.98	Bacteroidetes_incertae_sedis	0.42					Ohtaekwangia	0.42			GATGAACGCTAGCGGCAGGCCTAATACATGCAAGCTGAACGGCAAGTTGAATAGCAATATTTGACCTAGAGTAGCGTAAGGGTGCGTAACACGTATGCAATCTGCCCGCAACAGGAGGATAGCTTGATGAAAGTTGAGATAAGACTCCATAAGATCACAGGAGGGCATCTGATAGTGATTAAACTACAAGGGGTTGCGGATGAGCATGCGCATGATTAGTTAGTTGGCGGGGTAACGGCCCACCAAGACAATGATCATTAGGGGAACTGAGAGGTTGGTCCcccACACTGGCACTGAGATACGGGCCAGACTCCTACGGGAGGCAGCAGTAGGGAATATTGGACAATGGGTGCAAGCCTGATCCAGCCATGCCGCGTGCAGGAAGAAAGCCTTCTGGGT…
OTU_118	0	0	0	0	0	0	0	0	0	0	0	0	0	0	0	0	0	0	0	0	0	0	0	0	0	0	0	0	0	0	Bacteria	1	Acidobacteria	0.98	Acidobacteria_Gp10	0.97					Gp10	0.97			AATGAACGCTGGCGGCGTGCTTAACACATGCAAGTCGTGCGCGAAGGTGGCTTCGGCTACCGGAGAGCGGCGAACGGGTGAGTAACACGTGGGTGATCTGCCTGGGAATGGgggATAACCTGGGGAAACTCGGGCTAATACCGCATACGTCGGTGAGGTTGCGACCTTGCCGAGAAAGCTGGCCTCTGCTTGCAAGCTAGCGTTCCCAGAGGAGCCCGCGGCTGATTAGCTAGTTGGTGGGGTAAAGGCCCACCAAGGCGACGATCAGTAGCCGGCCTGAGAGGGTGATCGGCCACACTGGGACTGAGACACGGCCCAGACTCCTACGGGAGGCAGCAGTGGGGAATATTGGACAATGGGCGCAAGCCTGATCCAGCAACGCCGCGTGGAGGACGAAGG…
OTU_119	0	0	0	0	0	0	0	0	0	0	0	0	0	0	0	0	0	0	0	0	0	0	0	0	0	0	0	0	0	0	Bacteria	1	Planctomycetes	0.99	Planctomycetacia	0.99	Planctomycetales	0.99	Planctomycetaceae	0.99	Planctomyces	0.83			AATGAACGTTGGCGGCGTGGATTAGGCATGCAAGTCGGACGAGAATCCTCCTTCGGGAGGAGGACAGTGGCAAACGGAGCAGTAAGGCGTAGGCGACGTACCCTCCGGACCGGGATAGCCAGGGGAAACTCTGGGTAATACCGGATGATCTCGGCGAGCATGACCGCTTGTCGAGCAAAGGTGTGATTCCACCGGgggAGCGGCTTACGTAGTATTAGCTTGTTGGTGAGGTAACGGCTCACCAAGGCGATGATGCTTAGGGGATGTGAGAGCATGATCCCCGCTACTGGGACTGAGATACTGCCCAGACACCTACGGGTGGCTGCAGTCGAGAATCTTCGGCAATGGGCGCAAGCCTGACCGAGCGACGCCGCGTGCGGGATGAAGGCCCTTGGGTTG…
OTU_120	0	0	0	0	0	0	0	0	0	0	0	0	0	0	0	0	0	0	0	0	0	0	0	0	0	0	0	0	0	0	Bacteria	1	Bacteroidetes	0.99	Flavobacteria	0.32	Flavobacteriales	0.32	Flavobacteriaceae	0.22	Leptobacterium	0.07			GATTAACGCTAGCGGCAGGCCTAATACATGCAAGTCGAACGGCAGCACGGGTAGCAATACCTGGTGGCGAGTGGCGCACGGGTGCGTAACGCGTATGCAATCTACCTATAACTGGGGAATAGCCTTCCGAAAGGAAGATTAATACCGCATAACATCACGAGGTGGCATCATTTTGTGATCAAATCTCCGGAGGTTATAGATGAGCATGCGTGACATTAGCTAGTTGGTGAGGTAACGGCTCACCAAGGCTACGATGTCTAGGgggTCTGAGAGGATGATCCcccACACTGGTACTGAGACACGGACCAGACTCCTACGGGAGGCAGCAGTAAGGAATATTGGACAATGGCCGCAAGGCTGATCCAGCCATGCCGCGTGCAGGATGAAGGTGCTCTGCAT…
OTU_122	0	0	0	0	0	0	0	0	0	0	0	0	0	0	0	0	0	0	0	0	0	0	0	0	0	0	0	0	0	0	Bacteria	1	Verrucomicrobia	1	Subdivision3	1					Subdivision3_genera_incertae_sed	1			AACGAACGCTGGCGGCGTGGATAAGACATGCAAGTCGAACGATCACTATTGGGTAGCAATATTCGGTAGTGGGAGTGGCGCAAGGGTGCGTAACACGTGGGTAATTTGCCGTAAAGTCTGGGATAACTTGCTGAAAGGCGAGCTAATACCGGATGTGATTGCTGGAGGGCATCCTCTGGCACTTAAAGTCGGGGACCGTAAGGCCTGACACTTTTCGATAAGCCCGCGGCCTATCAGCTAGTTGGTGAGGTAACGGCTCACCAAGGCTAAGACGGGTAGCTGGTCTGAGAGGACGACCAGCCTCACTGGAACTGAGACACGGTCCAGACACCTACGGGTGGCAGCAGTCGAGAATTtttCTCAATGGgggAAACCCTGAAGGAGCGACGCCGCGTGGgg…
OTU_123	0	0	0	0	0	0	0	0	0	0	0	0	0	0	0	0	0	0	0	0	0	0	0	0	0	0	0	0	0	0	Bacteria	1	Chlorobi	1	Ignavibacteria	1	Ignavibacteriales	1	Ignavibacteriaceae	1	Ignavibacterium	1			GACGAACGCTGGCGGCGTGCTTAACACATGCAAGTCTACGAGAATAAGGTAGCAATATCTTTAGTAAAGTGGCGCACGGGTGAGTAACACGTAAGTAACCTACCTTTAGATTTGGAATAACCCCGAGAAATCGGGGCTAATACCGAATGATGCAGCGGCACCACATGGTGATGTTGTTAAAGTCTATATGACGTCTAAAGATGGGCTTGCGTCTGATTAGCTAGTTGGTGAGGTAATGGCTCACCAAGGCTACGATCAGTAGCTGGTCTGAGAGGATGATCAGCCACACTGGAACTGAGACACGGTCCAGACTCCTACGGGAGGCAGCAGTGAGGAATATTGGGCAATGCCCGGAAGGGTGACCCAGCAACGCCGCGTGGAGGATGAAGGCCGTAAGGT…
OTU_126	0	0	0	0	0	0	0	0	0	0	0	0	0	0	0	0	0	0	0	0	0	0	0	0	0	0	0	0	0	0	Bacteria	1	Acidobacteria	1	Acidobacteria_Gp6	1					Gp6	1			AATCAACGCTGGCGGCGTGCCTAACACATGCAAGTCGAACGCGAAAGGGGCTTCGGTCCTGAGTAGAGTGGCGAACGGGTGAGTAACGCGTGGGTGATCTACCTTCGAGTGGgggATAACGTCCCGAAAGGGGCGCTAATACCGCATGACGTTCTGGGTTTAAAGACCTGGAAACCAAAGCCGGGGACCGCAAGGCCTGGCGCTTGGAGAGGAGCCCGCGTCCGATTAGCTAGTTGGCGGGGTAATGGCCCACCAAGGCGACGATCGGTAGCCGGCCTGAGAGGGCGGACGGCCACACTGGAACTGAGACACGGTCCAGACTCCTACGGGAGGCAGCAGTGGGGAATTGTTCACAATGGGCGCAAGCCTGATGACGCAACGCCGCGTGGgggATGAAGG…
OTU_127	0	0	0	0	0	0	0	0	0	0	0	0	0	0	0	0	0	0	0	0	0	0	0	0	0	0	0	0	0	0	Bacteria	1	Actinobacteria	0.16	Actinobacteria	0.16	Coriobacteriales	0.09	Coriobacteriaceae	0.09	Adlercreutzia	0.08			AACGAACGCTGGCGGCGTGACTTAGGCATGCAAGTCGAACGGGAAAGCCCGCAAGGGCGAGTACAGTGGCGAAAGGGTGAGCAATGCTTGGGCAATCTGCCCCTGGGACCGGGATAGCCTCTGGAAACGGAGGGTAATACCGGATGGCCTCGCGGTGGCTTCGGCCGCTGCGAGTAAAGGTGGGGTCGCAAGACCTGTCACCCAGGGAGGAGCTCAAGTCCTATCAGCTAGTTGGTGAGGTGACGGCTCACCAAGGCAAAGACGGGTAGCCGGACTGAGAGGTCGACCGGCCACACTGGCACTGGGACACTGGCCAGACTCCTACGGGAGGCTGCAGTCGTGAATCTTCCGCAATGAGCGCAAGCTTGACGGAGCGACGCCGCGTGGAGGAAGAAGGCC…
OTU_128	0	0	0	0	0	0	0	0	0	0	0	0	0	0	0	0	0	0	0	0	0	0	0	0	0	0	0	0	0	0	Bacteria	1	Verrucomicrobia	1	Spartobacteria	0.97					Spartobacteria_genera_incertae_s	0.97			AACGAACGGTGGCGGCGTGGATAAGACATGCAAGTCGAACGGGACTTTCAGTGTAGCAATACATTGAAAGTTCAGTGGCGTAAGGGTGCGTAACACGTGGGAAATCTGCCGAGAAGTGGgggATAGCTCGCCGAAAGGCGAATTAATACCGCATGTGGTCAGCGAAGACATCTTCGCGAAACCAAAGCCGGGGCAACCTGGCGCTTCTTGATGATCCCGCGGCCTATCAGCTAGTTGGCGGGGTAAAAGCCCACCAAGGCTATGACGGGTAGCTGGTCTGAGAGGACGACCAGCCACACTGGAACTGAGACACGGTCCAGACACCTACGGGTGGCAGCAGTCGAGAATTtttCTCAATGGgggAAACCCTGAAGGAGCGACGCCGCGTGGAGGATGAAG…
OTU_129	0	0	0	0	0	0	0	0	0	0	0	0	0	0	0	0	0	0	0	0	0	0	0	0	0	0	0	0	0	0	Bacteria	1	Proteobacteria	1	Betaproteobacteria	0.95	Rhodocyclales	0.47	Rhodocyclaceae	0.47	Sulfuritalea	0.18			ATTGAACGCTGGCGGAATGCTTTACACATGCAAGTCGAGCGGCAGCGCGGGGCAACCTGGCGGCGAGCGGCGAACGGGTGAGTAATatatCGGAACGTGTCCTATCGTGGgggATAGCCCGGCGAAAGCCGGATTAATACCGCATACGATCGAgagaTGAAAGTGGgggACCGCAAGGCCTCACGCGACGGGAGCGGCCGATATCAGATTAGCTAGTTGGTGAGGTAAAGGCTCACCAAGGCTCCGATCTGTAGCTGGTCTGAGAGGATGATCAGCCACACTGGGACTGAGACACGGCCCAGACTCCTACGGGAGGCAGCAGTGGGGAATTTTGGACAATGGgggCAACCCTGATCCAGCCATTCCGCGTGAGTGAAGAAGGCCTTCGGGTTGTAAAGC…
OTU_130	0	0	0	0	0	0	0	0	0	0	0	0	0	0	0	0	0	0	0	0	0	0	0	0	0	0	0	0	0	0	Bacteria	1	Bacteroidetes	0.99	Flavobacteria	0.45	Flavobacteriales	0.45	Flavobacteriaceae	0.39	Mesoflavibacter	0.05			GATTAACGCTAGCGGCAGGCATAATACATGCAAGTTGAACGGGATAAGCTGTAGCAATATGGCTTTGAGAGTAGCGCACGGGTGCGTAACACGTATGCAATCTACCTTTATCTGTGGAATAGCCCCTCGAAAGAGGGATTAATACCACATAATATAATGAATAGGCATCTATTTATTATCAAAGCTCCGGCGGATAAAGATGAGCATGCGGCTGATTAGGTAGTTGGTGAGGTAATGGCTCACCAAGCCTACGATCAGTAGGgggTCTGAGAGGATGTCCccccACACTGGTACTGAGACACGGACCAGACTCCTACGGGAGGCAGCAGTAGGGAATATTGGTCAATGGAGGCAACTCTGAACCAGCCATGCCGCGTGCAGGATTAAGGCCCTATGGGT…
OTU_132	0	0	0	0	0	0	0	0	0	0	0	0	0	0	0	0	0	0	0	0	0	0	0	0	0	0	0	0	0	0	Bacteria	1	Proteobacteria	1	Betaproteobacteria	1	Burkholderiales	0.64	Burkholderiales_incertae_sedis	0.6	Thiobacter	0.6			ATTGAACGCTGGCGGCATGCTTTACACATGCAAGTCGAGCGGCAGCGCGGgggCAACCCTGGCGGCGAGCGGCGAACGGGTGAGTAATGCATCGGAACGTATCCTTGAGTGGgggATAACCCAGCGAAAGTTGGGCTAATACCGCATGAGCTCTGAGGAGGAAAGCGGgggACCTGCAAGGGCCTCGCGCTGGAGGAGCGGCCGATGTCCGATTAGCTAGTTGGTGGGGTAAAGGCTTACCAAGGCGACGATCGGTAGCTGGTCTGAGAGGATGATCAGCCACACTGGGACTGAGACACGGCCCAGACTCCTACGGGAGGCAGCAGTGGGGAATTTTGGACAATGGgggCAACCCTGATCCAGCCATGCCGCGTGAGTGAAGAAGGCCTTCGGGTTGTA…
OTU_134	0	0	0	0	0	0	0	0	0	0	0	0	0	0	0	0	0	0	0	0	0	0	0	0	0	0	0	0	0	0	Bacteria	1	Acidobacteria	1	Acidobacteria_Gp6	1					Gp6	1			AATCAACGCTGGCGGCGTGCCTAACACATGCAAGTCGAACGCGGTTACCCCGCAAGGGGTGACTGAGTGGCAAACGGGTGAGTAACGCGTGGGTGACCTACCTTCGAGTGGgggATAACGTTTCGAAAGGAACGCTAATACCGCATGACATCCTGCCTTTGGACAGGCGGAGATCAAAGCCGGGGATCGCAAGACCTGGCGCTTGAAGAGGGGCCCGCGTCCGATTAGCTAGTTGGTGGGGTAACGGCTCACCAAGGCGACGATCGGTAGCCGGCCTGAGAGGGCGGACGGCCACACTGGGACTGAGACACGGCCCAGACTCCTACGGGAGGCAGCAGTGGGGAATTGTTCGCAATGGGCGCAAGCCTGACGACGCAACGCCGCGTGGAGGATGAAGGT…
OTU_135	0	0	0	0	0	0	0	0	0	0	0	0	0	0	0	0	0	0	0	0	0	0	0	0	0	0	0	0	0	0	Bacteria	1	Planctomycetes	1	Planctomycetacia	1	Planctomycetales	1	Planctomycetaceae	1	Schlesneria	0.99			AATGAACGTTGGCGGCGTGGATTAGGCATGCAAGTCGAGCGAGAACCCGCAAGGgggACAGCGGCGAACGGGGTAGGAACACGTAGGTAACGTACCcccGGGGCGAGGACAGCCACGGGAAACTGTGGGTAATACTCGATAAACTTCCCAATCATTATCGGAGGGGAAGCAATGGGTGTGATTCCACCTGGGGAGCGGCTTACGCAGTATCAGCTTGTTGGTGAGGTAACGGCTCACCAAGGCGACGACGCTTAGGgggTGTGAGAGCATGGCCcccACCACTGGCACTGAGACACTGGCCAGACACCTACGGGTGGCTGCAGTCGAGAATCTTCGGCAATGGACGCAAGTCTGACCGAGCGACGCCGCGTGCGGGATGAAGGTCTTCGGATTGTAAAC…
OTU_136	0	0	0	0	0	0	0	0	0	0	0	0	0	0	0	0	0	0	0	0	0	0	0	0	0	0	0	0	0	0	Bacteria	1	Bacteroidetes	1	Bacteroidetes_incertae_sedis	0.98					Ohtaekwangia	0.98			GATGAACGCTAGCGGCAGGCCTAATACATGCAAGACGAACGGTAATTTGAGTAGCAATACTTGAACTAGAGTGTCGTAAGGGTGCGTAACACGTATGCAATCTGCCCGGGACTGGAGGATAGCTCGCCGAAAGGCGAATTAACACTCCATAATATGGTTGGGTGGCATCACTTGATCATTAAaaaTTTATTGGTTCCGGATGAGCATGCGGATGATTAGCTAGTTGGTAGTGTAACGGACTACCAAGGCGATGATCAATAGGGGAACTGAGAGGTTGATCCcccACACTGGCACTGAGATACGGGCCAGACTCCTACGGGAGGCAGCAGTAGGGAATATTGGACAATGGGTGAGAGCCTGATCCAGCCATGCCGCGTGCAGGAAGAAGGCCTTCTGGGT…
OTU_137	0	0	0	0	0	0	0	0	0	0	0	0	0	0	0	0	0	0	0	0	0	0	0	0	0	0	0	0	0	0	Bacteria	1	Bacteroidetes	1	Sphingobacteria	0.6	Sphingobacteriales	0.6	Flammeovirgaceae	0.31	Fabibacter	0.29			GATGAACGCTAGCGGCAGGCCTAATACATGCAAGTCGAACGGTAACATGAGTAGCAATACTTGATGACGAGTGGCGCACGGGTGCGTAACGCGTATGCAACCTACCTTTAACTGGGGAATAGCTCAGAGAAATCTGAATTAATACCCCATAGTATTATTGATCGGCATCGATTGATAATTAAAACTCCGGTGGTTAAAGATGGGCATGCGTGACATTAGCTAGTTGGTGAGGTAACGGCTCACCAAGGCTCCGATGTCTAGGGGATCTGAGAGGATTAACCcccACACTGGTACTGAGATACGGACCAGACTCCTACGGGAGGCAGCAGTAAGGAATATTGGTCAATGGACGCAAGTCTGAACCAGCCATGCCGCGTGCAGGATGACTGCCCTATGGGT…
OTU_138	0	0	0	0	0	0	0	0	0	0	0	0	0	0	0	0	0	0	0	0	0	0	0	0	0	0	0	0	0	0	Bacteria	1	Bacteroidetes	1	Bacteroidetes_incertae_sedis	0.91					Ohtaekwangia	0.91			GATGAACGCTAGCGGCAGGCCTAATACATGCAAGACGAACGGCAAGTTTGATAGCAATATTGAACCTAGAGTGTCGTAAGGGTGCGTAACACGTATGCAATCTGCCCTGTACAGGAGGATAGCTCCCCGAAAGGGGAATTAACACTCCATAAGATATCGGAGTGGCATCATTTTGATATTAAAACTGAGGTGGTACAGGATGAGCATGCGCATGATTAGTTAGTTGGCGGGGTAAAGGCCCACCAAGACGATGATCATTAGGGGAACTGAGAGGTTGATCCcccACACTGGCACTGAGATACGGGCCAGACTCCTACGGGAGGCAGCAGTAGGGAATATTGGACAATGGGTGAGAGCCTGATCCAGCCATGCCGCGTGCAGGAAGAAAGCCTTCTGGGT…
OTU_139	0	0	0	0	0	0	0	0	0	0	0	0	0	0	0	0	0	0	0	0	0	0	0	0	0	0	0	0	0	0	Bacteria	1	Bacteroidetes	0.96	Flavobacteria	0.45	Flavobacteriales	0.45	Flavobacteriaceae	0.42	Leptobacterium	0.24			GATTAACGCTAGCGGCAGGCCTAATACATGCAAGTCGAACGGCAGCACGGGTAGCAATACCTGGTGGCGAGTGGCGCACGGGTGCGTAACACGTATGCAATCTACCTTTAACTGGGGAATAACCCCTCGAAAGAGGGGCTAATACCGCATAACACTTTGATGGGACATCCCAATGAAGTCAAACCTACGGgggTTAAAGATGAGCATGCGTCCGATTAGCTAGTTGGCGGGGTAACGGCCCACCAAGGCAACGATCGGTAGGGGATCTGAGAGGATGATCCcccACACTGGTACTGAGACACGGACCAGACTCCTACGGGAGGCAGCAGTAAGGAATATTGGACAATGGGCGCAAGCCTGATCCAGCCATGCCGCGTGCAGGATGAAAGTGCTCTGCAC…
OTU_141	0	0	0	0	0	0	0	0	0	0	0	0	0	0	0	0	0	0	0	0	0	0	0	0	0	0	0	0	0	0	Bacteria	1	Verrucomicrobia	1	Spartobacteria	1					Spartobacteria_genera_incertae_s	1			AACGAACGCTGGCGGCGTGGATAAGACATGCAAGTCGAACGGGATTATTtttGTAGCAATACAGAAATAATTCAGTGGCGAACGGGTGCGTAACACGTGGGCAATCTGCCGAAAAGTGGgggATAGCTCGCCGAAAGGCGAATTAATACCGCATGTGGTGAGGGACGACATCTTCCTGAATCCAAAGCCGGGGCAACCTGGCGCTTtttGAGGAGCCCGCGGCCTATCAGCTAGTTGGTGAGGTAACGGCTCACCAAGGCTATGACGGGTAGCTGGTCTGAGAGGACGACCAGTCACACTGGAACTGAGACACGGTCCAGACACCTACGGGTGGCAGCAGTCGAGAATTtttCTCAATGGgggAAACCCTGAAGGAGCGACGCCGCGTGGAGGATGAAG…
OTU_142	0	0	0	0	0	0	0	0	0	0	0	0	0	0	0	0	0	0	0	0	0	0	0	0	0	0	0	0	0	0	Bacteria	1	Bacteroidetes	1	Bacteroidetes_incertae_sedis	0.79					Ohtaekwangia	0.79			GATGAACGCTAGCGGCAGGCCTAATACATGCAAGCCGAACGGCAAGTTTGATAGCAATATTGAACCTAGAGTGGCGTAAGGGTGCGTAACACGTATGCAATCTGCCCTGTACAGGGGAATAGCTCGGTGAAAACCGGATTAATGCCCCGTAATATGATTGTGAGGCATCTCATAATTATTAAAGTTGAGGCGGTACAGGATGAGCATGCGTATGATTAGTTAGTTGGCGGGGTAACGGCCCACCAAGACGATGATCATTAGGGGAACTGAGAGGTTGATCCcccACACTGGCACTGAGATACGGGCCAGACTCCTACGGGAGGCAGCAGTAGGGAATATTGGACAATGGGTGAGAGCCTGATCCAGCCATGCCGCGTGCAGGAAGAAGGCCTTCTGGGT…
OTU_143	0	0	0	0	0	0	0	0	0	0	0	0	0	0	0	0	0	0	0	0	0	0	0	0	0	0	0	0	0	0	Bacteria	1	Bacteroidetes	0.99	Flavobacteria	0.92	Flavobacteriales	0.92	Cryomorphaceae	0.63	Crocinitomix	0.43			GATGAACGCTAGCGGCAGGCTTAACACATGCAAGTCGAGGGGCAGCACGATGTAGCAATACATGGGTGGCGACCGGCGCACGGGTGCGTAACACGTATGGAATCTGCCCTTTACTGGAGGATAGCCCGGAGAAATCCGGATTAATACTCCATAACAAGCGAGGTGGCATCACCTTGCTTTGAAAGCTCCGGCGGTAAAGGATGACCATGCGCACGATTAGCTAGTTGGTGAGGTAACGGCTCACCAAGGCTACGATCGTTAGGgggCCTGAGAGGGTTATCCcccACACTGGTACTGAGACACGGACCAGACTCCTACGGGAGGCAGCAGTGAGGAATATTGCGCAATGGAGGCAACTCTGACGCAGCCATGCCGCGTGCAGGAAGAAGGCGCTACGCG…
OTU_146	0	0	0	0	0	0	0	0	0	0	0	0	0	0	0	0	0	0	0	0	0	0	0	0	0	0	0	0	0	0	Bacteria	1	Proteobacteria	0.83	Deltaproteobacteria	0.72	Syntrophobacterales	0.29	Syntrophobacteraceae	0.29	Desulforhabdus	0.17			AGCGAACGTTGGCGGCgcgcTTAACACATGCAAGTCGCACGCGAAAAGGGGCAACCCTGAGTAAAGTGGCGCACGGGTGCGTAACACGTAGGCAATCTGCCCTTAGATGGgggATAACCATCCGAAAGGATGGCTAATACCGCGTAAGACCACAGTCGCCTCGGCGACAGCGGTCATAGCTGGCCTCTACTTGTAAGCTAGCGTCTAAGGAGGAGCCTGCGGCCCATCAGCTTGTTGGCGAGGTAACGGCTCACCAAGGCTAAGACGGGTAGCTGGTCTGAGAGGATGATCAGCCACACTGGCACTGAAACACGGGCCAGACTCCTACGGGAGGCAGCAGTGGGGAATATTGGACAATGGGCGAAAGCCTGATCCAGCGACGCCGCGTGGGTGATGAAG…
OTU_147	0	0	0	0	0	0	0	0	0	0	0	0	0	0	0	0	0	0	0	0	0	0	0	0	0	0	0	0	0	0	Bacteria	1	Bacteroidetes	0.95	Sphingobacteria	0.57	Sphingobacteriales	0.57	Cyclobacteriaceae	0.12	Aquiflexum	0.07			GATGAACGCTAGCGGCAGGCCTAATACATGCAAGTCGAGCGGCAGCACGGGAGCAATCCTGGTGGCGAGCGGCGCACGGGTGCGGAACACGTATGCAACCTACCCGGTACAGGGGTATATCCAGGAGAAATTCTGAGTAATCCcccATAAGATCCAGGGGTGGCATCACCCTTTGATGGAAGGATTTATCCGGTACCGGATGGGCATGCGTTTGATTAGCTAGTTGGTGAGGTAACGGCTCACCAAGGCGACGATCAATAGCTGGTCTGAGAGGATGATCAGCCACACTGGCACTGAGATACGGGCCAGACTCCTACGGGAGGCAGCAGTAGGGAATATTGGACAATGGGCGCAAGCCTGATCCAGCCATGCCGCGTGCAGGATGAAGGCCCTCTGGGT…
OTU_149	0	0	0	0	0	0	0	0	0	0	0	0	0	0	0	0	0	0	0	0	0	0	0	0	0	0	0	0	0	0	Bacteria	1	Bacteroidetes	1	Bacteroidetes_incertae_sedis	0.86					Ohtaekwangia	0.86			GATGAACGCTAGCGGCAGGCCTAATACATGCAAGCCGAACGGCAAGCTTGGTAGCAATACTGAGCCTAGAGTGGCGTAAGGGTGCGTAACACGTATGCAATCTGCCCTCAACAGGAGGATAGCTCCCCGAAAGGGGAATTAAGACTCCATAAGATATTAGAGTGGCATCACTTAGATATTAAAGTACAAGCGGTTGAGGATGAGCATGCGCATGATTAGTTAGTTGGCGGTGTAAAGGACCACCAAGACGATGATCATTAGGGGAACTGAGAGGTTGATCCcccACACTGGCACTGAGATACGGGCCAGACTCCTACGGGAGGCAGCAGTAGGGAATATTGGACAATGGGTGCAAGCCTGATCCAGCCATGCCGCGTGCAGGAAGAAAGCCTTCTGGGT…
OTU_152	0	0	0	0	0	0	0	0	0	0	0	0	0	0	0	0	0	0	0	0	0	0	0	0	0	0	0	0	0	0	Bacteria	1	Proteobacteria	0.96	Deltaproteobacteria	0.96	Myxococcales	0.96	Polyangiaceae	0.61	Chondromyces	0.29			AGCGAACGTTAGCGGCgcgcCTAACACATGCAAGTCGCACGAGAGGgggCAACCCCGAAAGTGGCGCACGGGTGCGTAACACGTAGATAACCTGCCCTTCGCAGGgggATAACGTTCCGAAAGGAGCGCTAATACCGCGTACAGCATTCTGGGGTTAGCTTCGGGATGACAAAGGCTGGGATTCGCAAGAACCAGTCGGCGAAGGAGGGGTCTGCGGCCCATCAGCTAGTTGGTGAGGTAATGGCTCACCAAGGCAAAGACGGGTAGCTGGTCTGAGAGGATGATCAGCCACACTGGTACTGGAACACGGACCAGACTCCTACGGGAGGCAGCAGTGGGGAATCTTGGTCAATGGGCGAAAGCCTGAACCAGCGACGCCGCGTGAGTGATGAAGGCCTT…
OTU_153	0	0	0	0	0	0	0	0	0	0	0	0	0	0	0	0	0	0	0	0	0	0	0	0	0	0	0	0	0	0	Bacteria	1	Bacteroidetes	1	Sphingobacteria	0.53	Sphingobacteriales	0.53	Sphingobacteriaceae	0.39	Pseudosphingobacterium	0.24			GATGAACGCTAGCGGCAGGCCTAATACATGCAAGTCGAGGGGCAGCGAGTCTAGCAATAGATGTCGGCGACCGGCGCACGGGTGCGTAACACGTATACAATCTGCCTTTAACAGGgggATAGCCCGGAGAAATCCGGATTAATACCCCATAACACATGAAATAGCATTATTTTATGTTAAAAGCTCCGGCGGTTAGAGATGAGTATGCGTCTGATTAGCTAGTTGGTGAGGTAACGGCTCACCAAGGCGACGATCAGTAGGGGATCTGAGAGGACTACCccccACACGGATACTGAGACACGGATCCGACTCCTACGGGAGGCAGCAGTAAGGAATATTGGACAATGCCCGCAAGGGTGATCCAGCCATGCCGCGTGCAGGAAGACGGCCCTATGGGTT…
OTU_154	0	0	0	0	0	0	0	0	0	0	0	0	0	0	0	0	0	0	0	0	0	0	0	0	0	0	0	0	0	0	Bacteria	1	Actinobacteria	0.83	Actinobacteria	0.83	Nitriliruptorales	0.23	Nitriliruptoraceae	0.23	Nitriliruptor	0.23			GACGAACGCTGGCGGCgcgcTTAACACATGCAAGTCGAGCGATCGACTCGGGGCTTGCCCCGAGCACGGAGCGGCGAACGGGTGAGTAACACGTGGGTGACCTGCCCTCGGTTCTGGGATAACTCCGGGAAACCGGCGCTAATACCAGATGGCCTCCGATGTCTACGGACATTTGAGAAAAGGTAGCTTTGGCCTCCGACCGAGGATGGGCCCGCGGCCGATTAGCTTGTTGGTGAGGTAATGGCTCACCAAGGCGACGATCGGTAGCTGGTGTGAGAGCATGACCAGCCACACTGGGACTGAGACACGGCCCAGACTCCTACGGGAGGCAGCAGTGGGGAATCTTGCGCAATGGGCGAAAGCCTGACGCAGCGACGCCGCGTGCGGGAAGAAGGCCTT…
OTU_155	0	0	0	0	0	0	0	0	0	0	0	0	0	0	0	0	0	0	0	0	0	0	0	0	0	0	0	0	0	0	Bacteria	1	Bacteroidetes	1	Bacteroidetes_incertae_sedis	0.73					Ohtaekwangia	0.73			GATGAACGCTAGCGGCAGGCCTAATACATGCAAGACGAACGGCAAGTTTGATAGCAATATTGAACCTAGAGTGTCGTAAGGGTGCGTAACACGTATGCAATCTACCCGAAACTGGAGCATAGCTCCCCGAAAGGGGAATTAACACTCCATAAGATCATAGGATGGCATCATCCAGTGATTAAAACTGAGGTGGTTTCGGATGAGCATGCGTTTGATTAGTTAGTTGGTGAGGTAATGGCTCACCAAGACGATGATCAATAGGGGAACTGAGAGGTTGATCCcccACACTGGCACTGAGATACGGGCCAGACTCCTACGGGAGGCAGCAGTAGGGAATATTGGACAATGGGTGAGAGCCTGATCCAGCCATGCCGCGTGCAGGAAGAAGGCCTTCTGGGT…
OTU_157	0	0	0	0	0	0	0	0	0	0	0	0	0	0	0	0	0	0	0	0	0	0	0	0	0	0	0	0	0	0	Bacteria	1	Bacteroidetes	1	Sphingobacteria	0.92	Sphingobacteriales	0.92	Saprospiraceae	0.85	Haliscomenobacter	0.51			GATGAACGCTAGCGGGAAGCTTAATACATGCAAGTTGAGCGGTAACTGACTGATAGCAATATTAGTTAGCTAGAGCGGCGCACGGGTGAGTAACGCGTACATAACCTACCCTATACTGGgggATAGCCTTGGGAAACTGAGATTAATACCCCATGGTATTATTTGGCCTCCTGGTTGAATAATTAAAGTTGCGGCGGTATAGGATGGGTGTGCGTCTGATTAGCTAGTTGGTAAGGTAACGGCTTACCAAGGCGATGATCAGTAGGgggCGTGAGAGCGTGGTCCcccACACGGGTACTGAGACACGGACCCGACTCCTACGGGAGGCAGCAGTAAGGAATATTGGTCAATGGAGGAAACTCTGAACCAGCTATCCCGCGTGAAGGATGAAGGGGCTCT…
OTU_158	0	0	0	0	0	0	0	0	0	0	0	0	0	0	0	0	0	0	0	0	0	0	0	0	0	0	0	0	0	0	Bacteria	1	Bacteroidetes	1	Flavobacteria	0.69	Flavobacteriales	0.69	Cryomorphaceae	0.33	Owenweeksia	0.31			GATTAACGCTAGCGGCAGGCCTAATACATGCAAGTCGAACGGTAACAGGGTAGCAATACCGCTGACGAGTGGCGCACGGGTGCGTAACGCGTATGCAATCTACCTTTAACAGGGGAATAGCTCAGAGAAATCTGAATTAATACCGCATAATATAGTGAATGGGCATCCATTTACTATCAAACCTTCGGgggTTAAAGATGAGCATGCGTATCATTAGCTAGTTGGTGAGGTAATGGCTCACCAAGGCTACGATGATTAGGgggTCTGAGAGGATGATCCcccACACTGGTACTGAGACACGGACCAGACTCCTACGGGAGGCAGCAGTAAGGAATATTGGTCAATGGACGAAAGTCTGAACCAGCCATGCCGCGTGCAGGATTAAGGCCCTATGGGTCG…
OTU_159	0	0	0	0	0	0	0	0	0	0	0	0	0	0	0	0	0	0	0	0	0	0	0	0	0	0	0	0	0	0	Bacteria	1	Proteobacteria	1	Deltaproteobacteria	1	Myxococcales	1	Polyangiaceae	0.73	Byssovorax	0.41			AACGAACGTTAGCGGCgcgcCTAATACATGCAAGTCGAGCGAGAAAGGGCTTCGGCCCCAGTAAAGCGGCGCACGGGTGAGTAACACGTAGGTGATCTCCCCTAGAGTGGTGGATAACCCTCCGAAAGGAGGGCTAATACAGCATGAGACCACGATCCCGCTGGGATTGCGGTCAAAGCAGGCCTCTTCACGAAAGCTTGCGCTCTGGGATGAGCCTGCGGCCCATCAGCTAGTTGGTAAGGTAATGGCTTACCAAGGCTAAGACGGGTAGCTGGTCTGAGAGGATGAGCAGCCACACTGGAACTGAAACACGGTCCAGACTCCTACGGGAGGCAGCAGTAGGGAATCTTGCGCAATGGGCGAAAGCCTGACGCAGCGACGCCGCGTGAGCGATGAAGG…
OTU_160	0	0	0	0	0	0	0	0	0	0	0	0	0	0	0	0	0	0	0	0	0	0	0	0	0	0	0	0	0	0	Bacteria	1	Bacteroidetes	1	Bacteroidetes_incertae_sedis	0.86					Ohtaekwangia	0.86			GATGAACGCTAGCGGCAGGCCTAATACATGCAAGTCGAACGGTATTTTGGTAGCAATACTGAAAGagagTGACGTAAGGGTGCGTAACACGTATGCAATCTGCCCGCAACAGGGGTATAGCTCGGGGAAACCCGGATTAAGCCcccATAACATTTATTTGTGGCATCACAGATAGATTAAAGCTTCGGTGGTTGCGGATGAGCATGCGGATGATTAGCTAGTTGGTAGTGTAACGGACTACCAAGGCGATGATCAATAGGGGAACTGAGAGGTTGATCCcccACACTGGCACTGAGATACGGGCCAGACTCCTACGGGAGGCAGCAGTAGGGAATATTGGACAATGGGTGCAAGCCTGATCCAGCCATGCCGCGTGCAGGAAGAAGGCCTTCTGGGTTG…
OTU_161	0	0	0	0	0	0	0	0	0	0	0	0	0	0	0	0	0	0	0	0	0	0	0	0	0	0	0	0	0	0	Bacteria	1	Planctomycetes	0.37	Planctomycetacia	0.37	Planctomycetales	0.37	Planctomycetaceae	0.37	Singulisphaera	0.2			AACGAACGTTAGCGGTGTGGATTAGGCATGCAAGTCGTGCGCGAAAGCCGCAAGGCGAGTAGAGCGGCGAAAGGGTGAGTAACACGTAACCAACCTACCCCTCAGACCGGAATAACCACTGGAAACGGTGGATAATGCCGGATGTTCCTGGCTGGAGGCATCTCCGGCTCGGCAAATGGTGGCGCAAGCTGCCGCTTAGGGAGGgggTTGCGGGCTATCAGCTAGTTGGTGAGGTAACGGCTCACCAAGGCGATGACGGCTACCGGGTCTGAGAGGACGGTCCGGCACACTGGGACTGAGACACTGCCCAGACTCCTACGGGAGGCTGCAGTCGAGAATCTTCCGCAATGGGCGAAAGCCTGACGGAGCGACACCGCGTGCAGGATGAAGGCCTTCGGG…
OTU_163	0	0	0	0	0	0	0	0	0	0	0	0	0	0	0	0	0	0	0	0	0	0	0	0	0	0	0	0	0	0	Bacteria	1	Acidobacteria	1	Acidobacteria_Gp6	1					Gp6	1			AATCAACGCTGGCGGCGTGCCTAACACATGCAAGTCGAACGCGAAAGGGGCTTCGGCCCTGAGTAGAGTGGCAAACGGGTGAGTAACACGTGGGTGACCTACCTTCAAGTGGgggATAACGTTCCGAAAGGAACGCTAATACCGCATATTGTCCCGTCTTTAGACAGACGACGATGAAAGCCGGGGATCGCAAGACCTGGCGCTAGGAGAGGGGCCCGCGTCCGATTAGCTAGTTGGTGGGGTAACGGCTCACCAAGGCGACGATCGGTAGCCGGCCTGAGAGGGCGGACGGCCACACTGGGACTGAGACACGGCCCAGACTCCTACGGGAGGCAGCAGTGGGGAATTGTTCGCAATGGGCGCAAGCCTGACGACGCAACGCCGCGTGGAGGATGAAGG…
OTU_165	0	0	0	0	0	0	0	0	0	0	0	0	0	0	0	0	0	0	0	0	0	0	0	0	0	0	0	0	0	0	Bacteria	0.99	Bacteroidetes	0.97	Sphingobacteria	0.92	Sphingobacteriales	0.92	Saprospiraceae	0.84	Haliscomenobacter	0.77			GATGAACGCTAGCTGGAGGCTTAATACATGCAAGTCGAGCGGGATTGGTAGCAATACCATGAGAGCGGCGGACGGGTGAGTAACGCGTACACGACCTACCTTTGACTGGgggATAGCCCTGGGAAACTGGGATTAATACCGCATATAATTCTGAATAATAAAGGTTTGGAATGAAAGTTCAGGCGGTCAGAGATGGGTGTGCGTCTGATTAGCTAGTTGGTAAGGTAACGGCTTACCAAGGCGATGATCAGTAGGgggCGTGAGAGCGTGGACCcccACACGGGTACTGAGACACGGACCCGACTCCTACGGGAGGCAGCAGTAAGGAATATTGGACAATGGCCGCAAGGCTGATCCAGCCATCCAGCGTGCAGGAAGAAGGCCCTACGGGTTGTAAAC…
OTU_166	0	0	0	0	0	0	0	0	0	0	0	0	0	0	0	0	0	0	0	0	0	0	0	0	0	0	0	0	0	0	Bacteria	1	Verrucomicrobia	1	Subdivision3	1					Subdivision3_genera_incertae_sed	1			AACGAACGCTGGCGGCGTGGATAAGACATGCAAGTCGAGCGGAACATTTCGGGTAGCAATATTCGGAATGTTTAGCGGCGCAAGGGTGCGTAACACGTGGGCAATTTGCCATGAAGCTGGGGATAACTCCGGGAAACCGGAGCTAATACCGAATGTGAACATTtttGGGCATCCAGAGGTGTTTAAAGCTGGGGACCGTAAGGCCTGGCACTTCATGATGAGCCCGCGGCCTATCAGCTAGTTGGCGGGGTAACGGCCCACCAAGGCTAAGACGGGTAGCTGGTCTGAGAGGACGACCAGCCACACTGGAACTGAGACACGGTCCAGACACCTACGGGTGGCAGCAGTCGAGAATTtttCACAATGGGCGCAAGCCTGATGGAGCGACGCCGCGTGGgg…
OTU_168	0	0	0	0	0	0	0	0	0	0	0	0	0	0	0	0	0	0	0	0	0	0	0	0	0	0	0	0	0	0	Bacteria	1	Proteobacteria	1	Deltaproteobacteria	1	Myxococcales	1	Polyangiaceae	0.77	Byssovorax	0.65			AACGAACGTTAGCGGCgcgcCTAACACATGCAAGTCGAACGCGACTGGgggCAACTCCAGTTGAGTGGCGCACGGGTGAGTAACACGTAGGTAATCTCCccccGAGTGGTGGATAACCCTCCGAAAGGAGAGCTAATACAGCATGAGACCACGGTTCCGAAAGGGATTGAGGTCAAAGCGGAGGATCGCAAGACTTCGCGCTTGGGGATGAGCCTGCGGCCCATCATGGTAGTTGGCGGGGTAATGGCCCACCAAGCCTTAGACGGGTAGCTGGTCTGAGAGGATGATCAGCCACACTGGAACTGAGACACGGTCCAGACTCCTACGGGAGGCAGCAGTGGGGAATCTTGCGCAATGGACGAAAGTCTGACGCAGCGACGCCGCGTGGGTGATGAAGGC…
OTU_169	0	0	0	0	0	0	0	0	0	0	0	0	0	0	0	0	0	0	0	0	0	0	0	0	0	0	0	0	0	0	Bacteria	1	Bacteroidetes	1	Sphingobacteria	1	Sphingobacteriales	1	Sphingobacteriaceae	1	Mucilaginibacter	1			GATGAACGCTAGCGGCAGGCCTAATACATGCAAGTCGGACGGGATAGGAGAGCTTGCTTTCCTTGAGAGTGGCGCACGGGTGCGTAACACGTATGTAACCTACCTTGATCAGGgggATAGCCTCTCGAAAGagagaTTAAGACCGCATAACATTGCAATATGGCATCATAAAGCAATCAAATATTTATAGGATCAAGATGGGCATGCGGAACATTAGCTAGTTGGTGTGGTAACGGCATACCAAGGCTACGATGTTTAGGGGATCTGAGAGGATGACCccccACACTGGTACTGAGACACGGACCAGACTCCTACGGGAGGCAGCAGTAAGGAATATTGGTCAATGGGCGGAAGCCTGAACCAGCCATGCCGCGTGCAGGAAGACGGCCCTACGGGTTG…
OTU_170	0	0	0	0	0	0	0	0	0	0	0	0	0	0	0	0	0	0	0	0	0	0	0	0	0	0	0	0	0	0	Bacteria	1	Bacteroidetes	1	Flavobacteria	0.66	Flavobacteriales	0.66	Flavobacteriaceae	0.63	Jejuia	0.05			GATGAACGCTAGCGGCAGGCCTAATACATGCAAGTCGAGGGGTAACAGGTGTAGCAATACATGCTGACGACCGGCGCACGGGTGCGTAACACGTAtataATCTACCTTTTACTGGAGAATAGCCCGAAGAAATTCGGATTAATGCTCCATAATAATATTGGGAGGCATCTCTTGATATTTAAAGTTCCGACGGTAAAATGATGAGTATGCGCGATATTAGCTAGTTGGTGAGGTAACGGCTCACCAAGGCGACGATATCTAGGGGTACTGAGAGGTTACACCcccACACTGGTACTGAGACACGGACCAGACTCCTACGGGAGGCAGCAGTAAGGAATATTGGACAATGGTCGCAAGACTGATCCAGCCATGCCGCGTGCAGGATGACTGCCCTATGGG…
OTU_172	0	0	0	0	0	0	0	0	0	0	0	0	0	0	0	0	0	0	0	0	0	0	0	0	0	0	0	0	0	0	Bacteria	1	Verrucomicrobia	1	Subdivision3	1					Subdivision3_genera_incertae_sed	1			AACGAACGCTGGCGGCGTGGATAAGACATGCAAGTCGAACGCTGATTTGAGGGTAGCAATATTCTCAAGTCGGAGTGGCGCAAGGGTGCGTAACACGTGGGTAATTTGCCATGAAGCCCGGGATAACTCGCTGAAAGGCGAGCTAATACCGGATGTGATCTTCGGGAGGCATCTCCTGAATCTTAAAGCTGGGGACCGTAAGGCCTGGCACTTCTTGATAAGCCCGCGGCCTATCAGCTAGTTGGTGAGGTAACGGCTCACCAAGGCTAAGACGGGTAGCTGGTCTGAGAGGACGACCAGTCACACTGGAACTGAGACACGGTCCAGACACCTACGGGTGGCAGCAGTCGAGAATTtttCTCAATGGGCGAAAGCCTGAAGGAGCGACGCCGCGTGGgg…
OTU_173	0	0	0	0	0	0	0	0	0	0	0	0	0	0	0	0	0	0	0	0	0	0	0	0	0	0	0	0	0	0	Bacteria	1	Acidobacteria	1	Acidobacteria_Gp17	1					Gp17	1			AATCAACGCTGGCGGCGTGCCTAACACATGCAAGTCGAGCGCGAAAGGGGAGCAATCCCCAAGTAGAGCGGCGAACGGGTGAGTAACGCGTGGGTAATCTGCCTCCGAGTGGGGAACAACATCGGGAAACTGGTGCTAATACCGCATGACATCGTCGGGTCTTCGGATCTGACGATCAAAGCCGGGGACCGCAAGGCCTGGCGCTTGGAGAGGAGCCCGCGTCCGATTAGCTAGTTGGTGGGGTAATGGCCCACCAAGGCTTCGATCGGTAGCCGGCCTGAGAGGGCGGACGGCCACACTGGGACTGAGACACGGCCCAGACTCCTACGGGAGGCAGCAGTGGGGAATTtttCGCAATGGGCGAAAGCCTGACGAAGCAACGCCGCGTGGAGGATGAAG…
OTU_177	0	0	0	0	0	0	0	0	0	0	0	0	0	0	0	0	0	0	0	0	0	0	0	0	0	0	0	0	0	0	Bacteria	1	Bacteroidetes	0.99	Sphingobacteria	0.97	Sphingobacteriales	0.97	Chitinophagaceae	0.97	Segetibacter	0.27			GATGAACGCTAGCGGCAGGCTTAACACATGCAAGTCGAGGGGCAGCGGgggTAGCAATACTCGCCGGCGACCGGCAAACGGGTGCGGAACACGTACGCAACATACCCTTAACTGGGGCATAGCCTTCTGAAAAGGAGATTAACACCCCATAAGATAGTAGAGTGGCATCACTTCGCTATTAAATATTTATAGGTTAGGGATTGGCGTGCGTCCTATTAGCTAGTTGGTAGGGTAATGGCCTACCAAGGCGACGATAGGTAGCTGGTGTGAGAGCACGACCAGCCACACGGGCACTGAGACACGGGCCCGACTCCTACGGGAGGCAGCAGTGAGGAATATTGGTCAATGGGCGCAAGCCTGAACCAGCCATGCCGCGTGAAGGATGAAGGCGTTCTGCGT…
OTU_178	0	0	0	0	0	0	0	0	0	0	0	0	0	0	0	0	0	0	0	0	0	0	0	0	0	0	0	0	0	0	Bacteria	1	WS3	0.83							WS3_genera_incertae_sedis	0.83			AACGAACGTTGGCGGCGTGGATTAGGCATGCAAGTCGAACGGGATTCGGgggCAACTCCGGATCTAGTGGCGAACGGGTGAGTAACGCGTGGGAAACCTGCCCTCGAGTTGGGGATAACACTCCCAACGGGGTGCTAATACCGAATGAGACCACGAAGTCGCATGGCTACGAGGTCAAAGGTAGAAATGCCGCTCGAGGATGGTCCCGCGTCTGATTAGCTAGTTGGTGGGGTAATGGCCTACCAAGGCTACGATCAGTAGCTGGTCTGAGAGGATGGTCAGCCACACTGGGACTGAGATACGGCCCAGACTCCTACGGGAGGCAGCAGTCGAGAGGCTTCGGCAATGGgggAAACCCTGACCGAGCGACGCCGCGTGGGCGATGAAGGCCGTTAGGTT…
OTU_179	0	0	0	0	0	0	0	0	0	0	0	0	0	0	0	0	0	0	0	0	0	0	0	0	0	0	0	0	0	0	Bacteria	1	Proteobacteria	1	Deltaproteobacteria	1	Myxococcales	1	Polyangiaceae	0.8	Sorangium	0.5			AACGAACGTTAGCGGCgcgcCTAAGACATGCAAGTCGAGCGAGAAAGGGCTTCGGCCCCGGTACAGCGGCGCACGGGTGAGTAACACGTAGGTAATCAACCCTCGAGTGGTGGATAACTCTCCGAAAGGAGAGCTAATACAGCATGACGCCAGCAATGGCCAAAGCGGGCCTCTTCATGAAAGCTCGCGCTAGAGGATGAGCCTGCGGCCCATCAGGTAGTTGGCGGAGTAATAGCCCACCAAGCCATAGACGGGTAGCTGGTCTGAGAGGATGAACAGCCACACTGGAACTGAGACACGGTCCAGACTCCTACGGGAGGCAGCAGTCGGGAATCTTCCGCAATGGGCGAAAGCCTGACGGAGCGACGCCGCGTGAGCGATGAAGGCCTTCGGGTTGTA…
OTU_181	0	0	0	0	0	0	0	0	0	0	0	0	0	0	0	0	0	0	0	0	0	0	0	0	0	0	0	0	0	0	Bacteria	1	Bacteroidetes	1	Bacteroidetes_incertae_sedis	0.83					Ohtaekwangia	0.83			GATGAACGCTAGCGGCAGGCCTAATACATGCAAGCTGAACGGCAAGATTTGTAGCAATACGAGTCCTAGAGTAGCGTAAGGGTGCGTAACACGTATGCAATCTACCCTCAACAGGAGGATAGCTCCCCGAAAGGGGAATTAAGACTCCATAAGATCACACGAAGGCATCTGAGAGTGATTAAAGTACAAGCGGTTGAGGATGAGCATGCGTCTGATTAGTTAGTTGGCGGGGTAACGGCCCACCAAGACGATGATCAGTAGGGGAACTGAGAGGTTGATCCcccACACTGGCACTGAGATACGGGCCAGACTCCTACGGGAGGCAGCAGTAGGGAATATTGGACAATGGGTGCAAGCCTGATCCAGCCATGCCGCGTGCAGGAAGAAGGCCTTCTGGGT…
OTU_183	0	0	0	0	0	0	0	0	0	0	0	0	0	0	0	0	0	0	0	0	0	0	0	0	0	0	0	0	0	0	Bacteria	1	Proteobacteria	1	Deltaproteobacteria	1	Myxococcales	1	Polyangiaceae	0.78	Sorangium	0.39			AACGAACGTTAGCGGCgcgcTTAACACATGCAAGTCGAACGCGTGAGGGCTTGCTCTCACGAGTGGCGCACGGGTGAGTAACACGTAGGTAATCTGCCCTCGAGTGGTGGATAACTCTCCGAAAGGAGAGCTAATACAGCATGAGACCACGGCACTTCGGTGCTGCGGCCAAAGCGGgggATCTTCGGACCTCGCGCTTGAGGATGAGCCTGCGGCCCATCAGCTAGTTGGTGGTGTAATGGACCACCAAGGCTAAGACGGGTAGCTGGTCTGAGAGGATGAACAGCCACACTGGAACTGAGACACGGTCCAGACTCCTACGGGAGGCAGCAGTGGGGAATCTTGCGCAATGGGCGAAAGCCTGACGCAGCGACGCCGCGTGAGCGATGAAGGCCCTCG…
OTU_186	0	0	0	0	0	0	0	0	0	0	0	0	0	0	0	0	0	0	0	0	0	0	0	0	0	0	0	0	0	0	Bacteria	1	Proteobacteria	1	Deltaproteobacteria	1	Myxococcales	1	Polyangiaceae	0.77	Sorangium	0.64			AACGAACGTTAGCGGCgcgcCTAACACATGCAAGTCGCACGAGAAAGGGCTTCGGCCCCGGTACAGTGGCGCACGGGTGAGTAACACGTAGATCATCTCCCCTCGAGTGGTGGATAACTTTCCGAAAGGAAAGCTAATACAGCATGAGACCACGGCTTCGTTGAAGCTGCGGCCAAAGCAGGCCTCTACACGTAAGCTTGCGCTTGAGGATGAGTCTGCGGCCCATCAGCTAGTTGGTAGGGTAATGGCCTACCAAGGCTAAGACGGGTAGCTGGTCTGAGAGGATGAACAGCCACACTGGAACTGAGACACGGTCCAGACTCCTACGGGAGGCAGCAGTGGGGAATCTTGCGCAATGGGCGAAAGCCTGACGCAGCGACGCCGCGTGAGCGATGAAGG…
OTU_187	0	0	0	0	0	0	0	0	0	0	0	0	0	0	0	0	0	0	0	0	0	0	0	0	0	0	0	0	0	0	Bacteria	1	Proteobacteria	1	Betaproteobacteria	0.34	Burkholderiales	0.23	Alcaligenaceae	0.1	Derxia	0.1			ATTGAACGCTGGCGGCGTGCCTAACACATGCAAGTCGAGCGGCAGCGCGGGAGCAATCCTGGCGGCGAGCGGCGAACGGGTGAGTAATGCTTCGGAATCTACCCATGTAGTGGGGAATAACTAGCCGAAAGGTTAGCTAATACCGCATACGACCTACGGGTGAAAGCAGGGGATCGCAAGACCTTGCGCTATTGGATGAGCCGAAGTCGGATTAGCTAGTTGGTGAGGTAACGGCTCACCAAGGCGACGATCCGTAGCTGGTCTGAGAGGACGACCAGCCACACTGGGACTGAGACACGGCCCAGACTCCTACGGGAGGCAGCAGTGGGGAATATTGGACAATGGgggCAACCCTGATCCAGCGACGCCGCGTgtgtgAAGAAGGCCTGCGGGTTGTAA…
OTU_189	0	0	0	0	0	0	0	0	0	0	0	0	0	0	0	0	0	0	0	0	0	0	0	0	0	0	0	0	0	0	Bacteria	1	Acidobacteria	0.99	Acidobacteria_Gp6	0.99					Gp6	0.99			AATCAACGCTGGCGGCGTGCCTAATACATGCAAGTCGTACGCGAAGACCCCGCAAGGGGTTGTTAGCGTGGCAAACGGGTGAGTAACGCGTGGGCGACCTGCCCTCGAGTGGgggATAACCTTCCGAAAGGAGGGCTAATACCGCATGATATGCCGTGTTTGGATACACGGACATCAAAGCCGGGGATCGCAAGACCTGGCGCTTGAGGAGGGGCCTACGTTCGATTAGCTAGTTGGTGGGGTAACGGCTCACCAAGGCTACGATCGATATCCGGCCTGAGAGGGCGGACGGACacacTGGGACTGAGACACGGCCCAGACTCCTACGGGAGGCAGCAGTAGGGAATTGTTCGCAATGGGCGCAAGCCTGACGACGCAACGCCGCGTGGAGGATGAAGA…
OTU_191	0	0	0	0	0	0	0	0	0	0	0	0	0	0	0	0	0	0	0	0	0	0	0	0	0	0	0	0	0	0	Bacteria	1	Verrucomicrobia	1	Subdivision3	1					Subdivision3_genera_incertae_sed	1			AACGAACGCTGGCGGCGTGGATAAGACATGCAAGTCGAACGCTGACTTCGAGGTAGCAATATTTTGAAGTTGGAGTGGCGCAAGGGTgtgtAACACGTGGGTAATTTGCCGTGAAGTCTGGGATAACTTGCTGAAAGGCGAGCTAATACCGGATGTGAAAGTTTGAAGGCATCTTTGGACTTTCAAAGTTGGGGACCGCAAGGCCCGACGCTTTATGATAAACCCGCGGCCTATCAGCTAGTTGGTGAGGTAATAGCTCACCAAGGCTAAGACGGGTAGCTGGTCTGAGAGGACGACCAGCCACACTGGAACTGAGACACGGTCCAGACACCTACGGGTGGCAGCAGTCGAGAATTtttCTCAATGGGCGAAAGCCTGAAGGAGCGACGCCGCGTGGgg…
OTU_192	0	0	0	0	0	0	0	0	0	0	0	0	0	0	0	0	0	0	0	0	0	0	0	0	0	0	0	0	0	0	Bacteria	1	Acidobacteria	1	Acidobacteria_Gp17	1					Gp17	1			AATCAACGCTGGCGGCGTGCCTAACACATGCAAGTCGAGCGCGAATGGGGAGCAATCCCCTAGTAGAGCGGCGAACGGGTGAGTAACACGTGGGTGATCTGCCTCCGAGTGGGGAACAACAGCGGGAAACTGCTGCTAATACCGCATGACATCATCGGGTCACAGCGATGATCAAAGCCGGGGACCGCAAGGCCTGGCGCTTGGAGAGGAGCCCGCGTCCGATTAGCTAGTTGGCGGGGTAATGGCCCACCAAGGCTCCGATCGGTAGCCGGCCTGAGAGGGCGGACGGCCACACTGGGACTGAGACACGGCCCAGACTCCTACGGGAGGCAGCAGTGGGGAATTtttCGCAATGGgggAAACCCTGACGAAGCAACGCCGCGTGGgggATGAAGGTCT…
OTU_193	0	0	0	0	0	0	0	0	0	0	0	0	0	0	0	0	0	0	0	0	0	0	0	0	0	0	0	0	0	0	Bacteria	0.99	Spirochaetes	0.35	Spirochaetes	0.35	Spirochaetales	0.35	Brevinemataceae	0.35	Brevinema	0.35			GATGAACGTTAGTAGCATGCCTAACACATGCAAGTCGAGCGGAAAGTGTTAGTAATATCACTTTTAGCGGCGAACGGGTGAGTAATGCTTATCTTACCTACCATTTAGTGGAGGACGTGCTGAAAGGTCCCTCAAAGGATCTTCTAGCTAATACTGCATACTCTTTGGCTTCGGTCAAAGGAAAGGAAGTCTTCGGACTTTCGCTAATTGATGGGGATAAGTCGCATCAGCTAGTTGGTGGGGTAAAGGCCTACCAAGGCTAAGACGCGTAGCCGGGCTGAGAGGCTGATCGGCCACAAGGGAACTGAGACACGGTCCCTACTCCTACGGGAGGCAGCAGTGAGGAATCGTCGACAATGGgggCAACCCTGATCGCTGCAATGCTACGTGAAGGATGAA…
OTU_195	0	0	0	0	0	0	0	0	0	0	0	0	0	0	0	0	0	0	0	0	0	0	0	0	0	0	0	0	0	0	Bacteria	1	TM7	0.75							TM7_genera_incertae_sedis	0.75			GATGAACGCTGGCGGCGTGCCTAAAACATGCAAGTCGTGCGGTAACAGGTTTAACACTAATCTTTTAACTTCGGTTGAAGGATAAGTGTTGAATGCTGACGAGCGGCGGACGGCTGAGTAACGCGTGGGAATCTACCCCAAAGTGAGGGATAAGCTCTGGAAACAGAGTCTAATACCGCATGTGATCTCCGGATGAAAGCTTTCGAGCGCTTTGGGAGGAGCCCGCGTAAGATTAGATAGTTGGTGAGGTAATGGCTCACCAAGTCGATGATCTTTAACTGGTTTGAGAGGATGATCAGTCAGACTGGAACTGAGACACGGTCCAGACTCCTACGGGAGGCAGCAGTTAGGAATATTCCACAATGGGCGAAAGCCTGATGGAGCAACGCCGCGTGGAGG…
OTU_196	0	0	0	0	0	0	0	0	0	0	0	0	0	0	0	0	0	0	0	0	0	0	0	0	0	0	0	0	0	0	Bacteria	1	Planctomycetes	1	Planctomycetacia	1	Planctomycetales	1	Planctomycetaceae	1	Schlesneria	0.53			AATGAACGTTGGCGGCGTGGATTAGGCATGCGAGTCGTACGAGAACCCGCAAGGgggACAGTGGCGAACGGGGTAGTAAGGCGTAGGTGACGTGCCCTGCGGTCGGGGATAGCTTAGGGAAACTTAAGGTAATACCCGATAATCCCATGAGGTTTGAAGACCCTATGGGCAAAGGTGTGATTCCACCACAGGAGCGGCTTGCGTGGTATTAGCTAGTTGGTGAGGTAACGGCTCACCAAGGCTGCGATGCCTAGGGGATGTTAGCGCATGATCCCCACCACTGGGACTGAGATACTGCCCAGACACCTACGGGTGGCTGCAGTCGAGAATCTTCGGCAATGGgggCAACCCTGACCGAGCGACGCCGCGTGTGGGATGAAGGCCCTTGGGTTGTAAACC…
OTU_197	0	0	0	0	0	0	0	0	0	0	0	0	0	0	0	0	0	0	0	0	0	0	0	0	0	0	0	0	0	0	Bacteria	1	Actinobacteria	0.99	Actinobacteria	0.99	Solirubrobacterales	0.59	Conexibacteraceae	0.35	Conexibacter	0.35			GACGAACGCTGGCGGCGTGCCTAACACATGCAAGTTGAGCGACGAACCGGGGCTTGCCCCGGGGCAAAGCAGCGAACGGGTGAGTAACACGTGGATAACGTACCCCGATAACCGGGACAACCCGAGGAAACTCGAGCTAATACCGGATGTTCTTACTACacacCAGTGGAGTAAGTAAAGGAAGCTTCGGCCTCCGTATTGGGAGCGGTCCGCGGCCCATTAGCTAGTTGGTGAGGTAACGGCTCACCAAGGCAACGATGGGTAGCTGGTCTGAGAGGACGATCAGCCACACTGGGACTGAGACACGGCCCAGACTCCTACGGGAGGCAGCAGTGGGGAATCTTGCGCAATGCGCGAAAGCGTGACGCAGCAACGCCGCGTGGgggAAGAAGGTTTTCG…
OTU_198	0	0	0	0	0	0	0	0	0	0	0	0	0	0	0	0	0	0	0	0	0	0	0	0	0	0	0	0	0	0	Bacteria	1	Bacteroidetes	1	Sphingobacteria	1	Sphingobacteriales	1	Chitinophagaceae	1	Ferruginibacter	0.98			GATGAACGCTAGCGGCAGGCTTAATACATGCAAGTCGAGGGGCAGCACGAATAGCAATATTTGGTGGCGACCGGCAAACGGGTGCGGAACACGTACGCAACCTTCCCGAAACAGGTGAATAGCCCTCCGAAAGGAGGATTAATACACCGTGAGATATAGAGCTGGCATCAGTTTTATATTATAGGTAGCAATACCGGTTTTGGATGGGCGTGCGCCTGATTAGGTAGTTGGTGCGGGTAACGGCCCACCAAGCCTCCGATCAGTAACTGGTGTGAGAGCACGACCAGTCACACGGGCACTGAGACACGGGCCCGACTCCTACGGGAGGCAGCAGTAAGGAATATTGGTCAATGGACGGAAGTCTGAACCAGCCATGCCGCGTGAAGGATGACTGCCCTC…
OTU_199	0	0	0	0	0	0	0	0	0	0	0	0	0	0	0	0	0	0	0	0	0	0	0	0	0	0	0	0	0	0	Bacteria	1	Acidobacteria	1	Acidobacteria_Gp6	1					Gp6	1			AATCAACGCTGGCGGCGTGCCTAACACATGCAAGTCGAACGCGGTTAGTAGCAATACTAACTGAGTGGCGAACGGGTGAGTAACGCGTGGGTGACCTACCTTCGAGTGGgggATAACGTCCCGAAAGGGACGCTAATACCGCATGACATCCTCTTtttGAACAGagagagaTCAAAGCCGGGGATCGCAAGACCCGGCGCTTGATGAGGGGCCCGCGTCTGATTAGCTAGTTGGTGGGGTAATGGCTCACCAAGGCGACGATCAGTATCCGGCCTGAGAGGGCGGACGGACacacTGGGACTGAGACACGGCCCAGACTCCTACGGGAGGCAGCAGTGGGGAATTGTTCACAATGGGCGCAAGCCTGATGACGCAACGCCGCGTGGAGGACGAAGGTCT…
OTU_201	0	0	0	0	0	0	0	0	0	0	0	0	0	0	0	0	0	0	0	0	0	0	0	0	0	0	0	0	0	0	Bacteria	1	WS3	1							WS3_genera_incertae_sedis	1			AACGAACGCTGGCGGCGTGGATTAGGCATGCAAGTCGAACGCGAAAGAGGgggAAACTCCTCGAGTAGAGTGGCGAACGGGTGAGTAACGCGTGAAGAACCTGCCTTCAACAGGgggATAACACTCCCAACGGGGTGCTAATACCGCATGAGACCACGGGTCCACCTGGACCTGAGGTCAAAGGTGGCCTCTGCTTGCAAGCTACCGGTTGAAGATGGCTTCGCGTCCCATTAGCTAGTTGGCGGTGTAACGGACCACCAAGGCGACGATGGGTAGCTGGTCTGAGAGGATGGTCAGCCACACTGGGACTGAGATACGGCCCAGACTCCTACGGGAGGCAGCAGTCGAGAGGCTTTGGCAATGGgggAAACCCTGACCAAGCGACGCCGCGTGGAGGAT…
OTU_202	0	0	0	0	0	0	0	0	0	0	0	0	0	0	0	0	0	0	0	0	0	0	0	0	0	0	0	0	0	0	Bacteria	1	Bacteroidetes	1	Bacteroidetes_incertae_sedis	0.94					Ohtaekwangia	0.94			GATGAACGCTAGCGGCAGGCCTAATACATGCAAGCTGAACGGTAACTTTTGTAGCAATACGGAAGCTAGAGTAGCGTAAGGGTGCGTAACACGTATGCAATCTGCCCTCAACAAGAGGATAGCTCCCCGAAAGGGGAATTAACCCTCTATGAGATCATGGTGTGGCATCAcacaGTGATTAAAACTCCGGTGGTTGAGGATGAGCATGCGACTGATTAGCTAGTTGGTAGTGTAATGGACTACCAAGGCGATGATCAGTAGGGGAACTGAGAGGTTGATCCcccACACTGGCACTGAGATACGGGCCAGACTCCTACGGGAGGCAGCAGTAGGGAATATTGGACAATGGGCGCAAGCCTGATCCAGCCATGCCGCGTGCAGGAAGAAGGCCTTCTGGGT…
OTU_203	0	0	0	0	0	0	0	0	0	0	0	0	0	0	0	0	0	0	0	0	0	0	0	0	0	0	0	0	0	0	Bacteria	1	Verrucomicrobia	1	Opitutae	1	Opitutales	1	Opitutaceae	1	Opitutus	1			AATGAACGCTGGCGGCGTGGTTAAGACATGCAAGTCGAACGGTTtttttGGTGTAGCAATACTTCGAAaaaGCAGTGGCGAACGGGTGCGTAACACGTGAACAATCTACCTCCAAGTGGGGAATAGCTCGCCGAAAGGCGAATTAATACCGCATGTGGTGGTTTCTCGCATGAgagaCTTACTAAAATCAGGGACCGCAAGGCCTGATGCTAGGAGAGGAGTTCGCGGCCTATCAGCTAGTTGGCGAGGTAACGGCTCACCAAGGCTAAGACGGGTAGCTGGTCTGAGAGGATGATCAGCCACACTGGAACTGAGACACGGTCCAGACACCTACGGGTGGCAGCAGTTTCGAATCATTCACAATGGGCGAAAGCCTGATGGTGCGACGCCGCGTGAGGG…
OTU_205	0	0	0	0	0	0	0	0	0	0	0	0	0	0	0	0	0	0	0	0	0	0	0	0	0	0	0	0	0	0	Bacteria	1	Planctomycetes	0.3	Phycisphaerae	0.3	Phycisphaerales	0.3	Phycisphaeraceae	0.3	Phycisphaera	0.3			AACGAACGCTGGAGGCGTGGCTAAGACATGCAAGTCGAACGGTACGTTGTAGCAATATGGCGTATAGTGGCGGACGGGTGAGTAATAAATAGCTAACGTACCTCGGTCTCGGGGATACCGCCGGGCGAAAGCCCTTTGCGAAAGTGGTGTTAATACCCGATGACGTTtttGGAAGGCATCTTCCGGAAATCAAAGGTGGGGACCGCAAGGCCTACCGGACTGAGAGCGGGCTATTTCCTATCAGCTAGTTGGTGAGGTAACGGCTCACCAAGGCTTTGACGGGTAGCCGGACTGAGAGGTTGTACGGCCACATCGGGACTGAGACACTGCCCGGACATCTACGGATGGCTGCAGTAACGAATATTCCGCAATGGGCGCAAGCCTGACGGAGCGACGCCT…
OTU_206	0	0	0	0	0	0	0	0	0	0	0	0	0	0	0	0	0	0	0	0	0	0	0	0	0	0	0	0	0	0	Bacteria	1	Bacteroidetes	1	Sphingobacteria	0.54	Sphingobacteriales	0.54	Sphingobacteriaceae	0.5	Solitalea	0.33			GATTAACGCTAGCGGCAGGCCTAATACATGCAAGTCGAACGGTAACATGAGTAGCAATACTTGATGACGAGTGGCGCACGGGTGCGTAACACGTATGCAACCTACCTATAACTGGGGAATAGCCTTCCGAAAGGAAGATTAACACCGCATAACATCATTCTACGGCATCGCAGAATGATCAAACCTCCGGgggTTATAGATGGGCATGCGTAACATTAGCTAGTTGGTGAGGTAACGGCTCACCAAGGCTACGATGTTTAGGgggTCTGAGAGGATGATCCcccACACTGGTACTGAGACACGGACCAGACTCCTACGGGAGGCAGCAGTAAGGAATATTGGACAATGGgggCAACCCTGATCCAGCCATGCCGCGTGAAGGATGACGGCCCTCTGGGT…
OTU_207	0	0	0	0	0	0	0	0	0	0	0	0	0	0	0	0	0	0	0	0	0	0	0	0	0	0	0	0	0	0	Bacteria	1	Proteobacteria	0.37	Deltaproteobacteria	0.21	Myxococcales	0.2	Cystobacteraceae	0.18	Hyalangium	0.13			GACGAACGCTGGCGGCgcgcTTAACACATGCAAGTCGAGCGAGAACCGGGACTTCGGTCCTGGGGACAGCGGCGAACGGGTGAGTAACACGTGGGTAATCTGCCCTCGATTCTGGGATAGCCCGGGGAAACCCGGATTAATACCGGATAGCCTTTCGAGCTTTCGGGCGCGAAAGAAAAGGTAGCTTCGGCCTCCGATCGAGGATGAGCCCGCGGTGGATTAGCTTGTTGGCGGGGTAATGGCCCACCAAGGCGACGATCCATAGCTGGTCTGAGAGGACGATCAGCCACACTGGGACTGAGACACGGCCCAGACTCCTACGGGAGGCAGCAGTGGGGAATCTTGCGCAATGGGCGAAAGCCTGACGCAGCGACGCCGCGTGGgggAAGAAGGCCTTAG…
OTU_209	0	0	0	0	0	0	0	0	0	0	0	0	0	0	0	0	0	0	0	0	0	0	0	0	0	0	0	0	0	0	Bacteria	1	Planctomycetes	0.4	Planctomycetacia	0.4	Planctomycetales	0.4	Planctomycetaceae	0.4	Singulisphaera	0.19			AACGAACGTTAGCGGTGTGGATTAGGCATGCAAGTCGcgcgcgAAAGTCCGCAAGGATGAGTAAAGCGGCGAAAGGGTGAGTAATACGTAGTCAACCTACCCCTGAGATCGGAATAACCACTGGAAACGGTGGCTAATGCTGGATGACTTTGTCGGGAGGCATCTTCTGACACAGAAATGGTGGCGCAAGCTGCTGTTCAGGGACGGGACTACGGGCTATCAGCTAGTTGGTGAGGTAATGGCTCACCAAGGCGATGACGGCTAGCCGATCTGAGAGGACGACCGGCCACACTGGGACTGAGACACTGCCCAGACTCCTACGGGAGGCTGCAGTCGAGAATCTTCCGCAATGGGCGAAAGCCTGACGGAGCGACACCGCGTACAGGATGAAGGCCTTCG…
OTU_210	0	0	0	0	0	0	0	0	0	0	0	0	0	0	0	0	0	0	0	0	0	0	0	0	0	0	0	0	0	0	Bacteria	1	Actinobacteria	1	Actinobacteria	1	Solirubrobacterales	1	Patulibacteraceae	0.49	Patulibacter	0.49			GACGAACGCTGGCGGCGTGCTTAACACATGCAAGTGGAGCGACGAACCAGGGCTTGCCCTGGGGCAGAGCCGCGAACGGGTGAGTAACACGTGGGCAACCTGCCCCGATGACTGGGACAACCCGAGGAAACTCGGGCTAATACCGGATGTGCTCCCTCACATAAGTGAGACGAGTAAAGGAAGCTTCGGCCTCCGCATTGGGATGGGCCCGCGGCCCATTAGCTTGTTGGTGGGGTAATGGCCTACCAAGGCAACGATGGGTAGCTGGTCTGTGAGGACGATCAGCCACACTGGGACTGAGACACGGCCCAGACTCCTACGGGAGGCAGCAGTGGGGAATCTTGCACAATGCGCGAAAGCGTGATGCAGCAACGCCGCGTGAGGGAAGACGGCCTTCGG…
OTU_211	0	0	0	0	0	0	0	0	0	0	0	0	0	0	0	0	0	0	0	0	0	0	0	0	0	0	0	0	0	0	Bacteria	1	Acidobacteria	1	Acidobacteria_Gp7	1					Gp7	1			AATGAACGCTGGCGGCGTGCTTTACACATGCAAGTCGAGCGAGGCGTGTAGCAATACACAGTCGAGCGGCGAACGGGTGAGTAACGCGTGGATGACCTGCCCTTTAGTGGGGAATAACCCGGGGAAACTCGGGCTAATACCGCATAAGACCGAGAGGTGAAAGCGGGGTCGCAAGATCTCGTGCTAATGGAGGGGTCCGCGTTCGATTAGCTAGTTGGTAGGGTAATGGCCTACCAAGGCGACGATCGATAGCCGGCCTGAGAGGGTGATCGGCCACACTGGAACTGAGACACGGTCCAGACTCCTACGGGAGGCAGCAGTGGGGAATTTTGCGCAATGGGCAAACGCCTGACGCAGCAACGCCGCGTGGAGGATGAAGGTCTTTGGATTGTAAACTCC…
OTU_212	0	0	0	0	0	0	0	0	0	0	0	0	0	0	0	0	0	0	0	0	0	0	0	0	0	0	0	0	0	0	Bacteria	1	Planctomycetes	1	Planctomycetacia	1	Planctomycetales	1	Planctomycetaceae	1	Schlesneria	0.95			AATGAACGTTGGCGGCGTGGATTAGGCATGCAAGTCGAGCGAGAACCCGCAAGGgggACAGCGGCGAACGGGGTAGGACAACGTAGGTAACGTACCCTCGGGGCGAGGACAGCCACGGGAAACTGTGGGTAATACTCGATAATGTTCCCAATCTTGATTGGAGGGGAACCAATGGGTGTGATTCCACCCGGGGAGCGGCTTACGCAGTATCAGCTTGTTGGCGAGGTAACGGCTCACCAAGGCTATGACGCTTAGGGGATGTGAGAGCATGATCCCCACCACTGGCACTGAGACACTGGCCAGACACCTACGGGTGGCTGCAGTCGAGAATCTTCGGCAATGGACGCAAGTCTGACCGAGCGACGCCGCGTGCGGGATGAAGGCCCTCGGGTTGTAAAC…
OTU_213	0	0	0	0	0	0	0	0	0	0	0	0	0	0	0	0	0	0	0	0	0	0	0	0	0	0	0	0	0	0	Bacteria	1	Bacteroidetes	1	Sphingobacteria	1	Sphingobacteriales	1	Chitinophagaceae	1	Flavitalea	0.48			GATGAACGCTAGCGGCAGGCTTAATACATGCAAGTCGTGGGGCAGCAGGTCCCGCAAGGGATGCTGGCGACCGGCAAACGGGTGCGGAACACGTACGCAACTTTCCTTCAAGCGGGGAATAGCCCAGGGAAACTTGGATTAATACCCCATAATCTTATTGAAGTGGCATCACTTTATAAGAAAAGCTCCGGCACTTGAAGATGGGCGTGCGGCTGATTAGGTAGTTGGCGGGGTAACGGCCCACCAAGCCTGCGATCAGTAACTGGTGTGAGAGCACGACCAGTCACACGGGCACTGAGACACGGGCCCGACTCCTACGGGAGGCAGCAGTAAGGAATATTGGGCAATGGACGCAAGTCTGACCCAGCCATGCCGCGTGGAGGATGAAGGTCCTCTGGA…
OTU_214	0	0	0	0	0	0	0	0	0	0	0	0	0	0	0	0	0	0	0	0	0	0	0	0	0	0	0	0	0	0	Bacteria	1	Actinobacteria	0.92	Actinobacteria	0.92	Solirubrobacterales	0.69	Conexibacteraceae	0.31	Conexibacter	0.31			GACGAACGCTGGCGGCGTGCTTAACACATGCAAGTCGAACGAGAACGCTCCTTCGGGAGTTAGTACAGTGGCGAACGGGTGAGTAACACGTGGGCAACCTGCCCTAGGGAGCGGGACAACCCGAGGAAACTCGGGCTAATACCGCATAATTCGCAGTGCCTCAAGGCACTGTGGGAAATGGTAGCTTCGGCCTCCGCCCTAGGATGGGCCCGCGGCGCATTAGCTTGTTGGTGTGGGTAACGGCCCACCAAGGCGACGATGCGTAGCTGGTCTGAGAGGACGATCAGCCACACTGGGACTGAGACACGGCCCAGACTCCTACGGGAGGCAGCAGTGGGGAATCTTGCGCAATGGGCGGAAGCCTGACGCAGCAACGCCGCGTGTGGGAAGACGGCTTTC…
OTU_216	0	0	0	0	0	0	0	0	0	0	0	0	0	0	0	0	0	0	0	0	0	0	0	0	0	0	0	0	0	0	Bacteria	1	Bacteroidetes	0.99	Sphingobacteria	0.99	Sphingobacteriales	0.99	Chitinophagaceae	0.99	Segetibacter	0.66			GATGAACGCTAGCGGCAGGCTTAACACATGCAAGTCGAGGGGCAGCACTGGTAGCAATACCTGGTGGCGACCGGCAAACGGGTGCGGAACACGTACAGAACCTACCTTGATCTGGGGCATAGCCCGAAGAAATTCGGATTAACTCCCCATAACATatatGAGAGGCATCTCTTGAATATTAAaaaTTTATTGGATCAAGATGGCTGTGCGTCCCATTAGCTAGTTGGTAGGGTAATGGCCTACCAAGGCGACGATGGGTAGCTGGTGTGAGAGCACGACCAGCCACACGGGCACTGAGACACGGGCCCGACTCCTACGGGAGGCAGCAGTGAGGAATATTGGTCAATGGACGCAAGTCTGAACCAGCCATGCCGCGTGAAGGATGAAGGCCTTCTGGGT…
OTU_217	0	0	0	0	0	0	0	0	0	0	0	0	0	0	0	0	0	0	0	0	0	0	0	0	0	0	0	0	0	0	Bacteria	1	Bacteroidetes	1	Flavobacteria	0.83	Flavobacteriales	0.83	Cryomorphaceae	0.63	Wandonia	0.38			GATGAACGCTAGCGGCAGGCTTAACACATGCAAGTCGAGGGGCAGCGCGATGTAGCAATACATTGGCGGCGACCGGCGCACGGGTGCGTAACACGTATGCAACCTTCCCGCCACTGGGGCATAGCCCGGAGAAATCCGGATTAACACCCCATAATTCCCTGGAGGGCATCTTCCGGGGCTGAAAATTCCGATGGTGGCGGATGGGCATGCGCCCGATTAGCTAGTTGGTGAGGTAACGGCTCACCAAGGCTACGATCGGTAGGgggCCTGAGAGGGTTATCCcccACACTGGTACTGAGACACGGACCAGACTCCTACGGGAGGCAGCAGTGAGGAATATTGCGCAATGGAGGCAACTCTGACGCAGCCATGCCGCGTGCAGGAAGACGGCCCTACGGG…
OTU_218	0	0	0	0	0	0	0	0	0	0	0	0	0	0	0	0	0	0	0	0	0	0	0	0	0	0	0	0	0	0	Bacteria	1	Actinobacteria	0.82	Actinobacteria	0.82	Acidimicrobiales	0.32	Acidimicrobineae_incertae_sedis	0.26	Aciditerrimonas	0.26			GACGAACGCTGGCGGCgcgcTTAACACATGCAAGTCGAGCGAGAACCGGTCCTTCGGGACCGGGGACAGCGGCGAACGGGTGAGTAACACGTGGGTAATCTGCCCTCGATTCTGGGATAGCCCGGGGAAACCCGGATTAATACCGGATAGCCTCGCTGGTCTTCGGGCCGGCGAGAAAAGGTAGCTTCGGCCTCCGATCGAGGATGAGCCCGCGGCGGATTAGCTTGTTGGTGGGGTAATGGCCCACCAAGGCTACGATCTGTAGCTGGTCTGAGAGGACGATCAGCCACACTGGGACTGAGACACGGCCCAGACTCCTACGGGAGGCAGCAGTGGGGAATCTTGCGCAATGGGCGAAAGCCTGACGCAGCGACGCCGCGTGGgggAAGAAGGCCTTCG…
OTU_219	0	0	0	0	0	0	0	0	0	0	0	0	0	0	0	0	0	0	0	0	0	0	0	0	0	0	0	0	0	0	Bacteria	1	Firmicutes	0.71	Bacilli	0.71	Bacillales	0.7	Pasteuriaceae	0.7	Pasteuria	0.7			AATGAACGTTGGCGGCGTGGATTAGGCATGCAAGTCGAGCGAGAACCAGTCtctcACTTTGTTCATTTAACCcccGGTCATTGACCGGgggCTAAGTGGGCGAGGTGAgagaCTGGGGACAGCGGCGAAAGGGAGAGTAACACGTAGTTACGTACCCCGAGGACCGGAATAGCTGCGGGAAACTGCAGGTAATGCCGGATAATGTCCTTGGACCAAAGGTGTGATTCCACCTCGGGAGCGGACTGCGTCGTACTAGCTAGTTGGTAGGGTAATGGCCTACCAAGGCAATGATGCGTAGCGGGTGTGAGAGCATGACCCGTCTCACTGGGACTGAGACACTGCCCAGACACCTACGGGTGGCTGCAGTCGAGAATCTTCGGCAATGAGCGCAAGCTTGAC…
OTU_220	0	0	0	0	0	0	0	0	0	0	0	0	0	0	0	0	0	0	0	0	0	0	0	0	0	0	0	0	0	0	Bacteria	1	Verrucomicrobia	1	Spartobacteria	1					Spartobacteria_genera_incertae_s	1			AACGAACGCTGGCGGCGTGGATAAGACATGCAAGTCGAACGGGACTACTTTTGGTCGCAAGACCGAGAGTAGTTTAGTGGCGAACGGGTGCGTAACACGTGGGCAATCTGCCGAGAAGTGGgggATAGCTCGCCGAAAGGCGAATTAATACCGCATATGATCAGGGACGACATCTTCCCAACATCAAAGCCGGGGTAACCTGGCGCTTCTTGATGAGCCCGCGGCCTATCAGCTAGTTGGTGAGGTAACGGCTCACCAAGGCTATGACGGGTAGCTGGTCTGAGAGGACGACCAGTCACACTGGAACTGAGACACGGTCCAGACACCTACGGGTGGCAGCAGTCGAGAATTtttCTCAATGGgggAAACCCTGAAGGAGCGACGCCGCGTGGAGGATGA…
OTU_222	0	0	0	0	0	0	0	0	0	0	0	0	0	0	0	0	0	0	0	0	0	0	0	0	0	0	0	0	0	0	Bacteria	1	Actinobacteria	0.45	Actinobacteria	0.45	Coriobacteriales	0.23	Coriobacteriaceae	0.23	Gordonibacter	0.2			AATCAACGCTGGCGGCGTGCCTAACACATGCAAGTCGAACGCGAAAGTCCCGCAAGGGATAAGTAGAGTGGCAAACGGGTGAGTAACACGTGGGTGACCTGCCTTCAAGTGGgggATAACGCTCCGAAAGGGACGCTAATACCGCATAACATGCCGCCTTTTAACAGGCGGACATCAAAGCCGGGGATCGCAAGACCTGGCGCTGGAAGAGGGGCCCGCGTCTGATTAGCTAGTTGGTGAGGTAATGGCTCACCAAGGCGACGATCAGTAGCTGGTCTGAGAGGATGGCCAGCCACACTGGGACTGAGACACGGCCCAGACTCCTACGGGAGGCAGCAGTAGGGAATCTTGCGCAATGGgggAAACCCTGACGCAGCGACGCCGCGTGCGGGATGAAGG…
OTU_223	0	0	0	0	0	0	0	0	0	0	0	0	0	0	0	0	0	0	0	0	0	0	0	0	0	0	0	0	0	0	Bacteria	0.99	Planctomycetes	0.47	Planctomycetacia	0.47	Planctomycetales	0.47	Planctomycetaceae	0.47	Singulisphaera	0.39			AACGAACGTTGGCGGCGTGGATGAGGCATGCAAGTCGAACGCGAAAGCCGCAAGGTGAGTAGCGTGGCGGACGGGCGAGTAACGCGTAATCAAGCTGCCTGCGAGACGGGGATAACCTCGGGAAACCGAGGCTAAGACCCGATGGTCTGGTTGGCCTGCATGGGCCGATCAGTAAATGGGCGGGATCCTTTGGGATCGCCTGCTCGCAGAGGTGATTGCGTCCCATCAGCTAGTTGGTAGGGTAATGGCCTACCAAGGCTACGACGGGTAGCCGGCCTTAGAGGGTGGTCGGCCGCACTGGGACTGAGACACTGCCCAGACTCCTACGGGAGGCTGCAGTCGAGAATCTTCCGCAATGGGCGAAAGCCTGACGGAGCGACGCCGCGTGGAGGACGAAGG…
OTU_227	0	0	0	0	0	0	0	0	0	0	0	0	0	0	0	0	0	0	0	0	0	0	0	0	0	0	0	0	0	0	Bacteria	1	Proteobacteria	0.97	Gammaproteobacteria	0.91	Xanthomonadales	0.33	Sinobacteraceae	0.31	Steroidobacter	0.31			ATTGAACGCTGGCGGCGTGCCTAACACATGCAAGTCGAGCGGTAACAGGCGTAGCAATACGTGCTGACGAGCGGCGGACGGGTGAGTAATGCTTGGGAATCTTCCCGGTAGTGGGGAATAACCAACCGAAAGGTTGGCTAATACCGCATACGTTCTACGGAAGAAAGCGGgggACCGTAAGGCCTCGCGCTATCGGATGAGCCCAAGTCGGATTAGCTAGTTGGCGGGGTAACGGCCCACCAAGGCGACGATCCGTAGCTGGTCTGAGAGGACGACCAGCCACACTGGGACTGAGACACGGCCCAGACTCCTACGGGAGGCAGCAGTGGGGAATATTGGACAATGGgggAAACCCTGATCCAGCGACGCCGCGTgtgtgAAGAAGGCCTGCGGGTTGTA…
OTU_229	0	0	0	0	0	0	0	0	0	0	0	0	0	0	0	0	0	0	0	0	0	0	0	0	0	0	0	0	0	0	Bacteria	0.99	OD1	0.43							OD1_genera_incertae_sedis	0.43			GATGAACGCTGGCGGCGTGGATGAGTCATGCAAGTCAAACGGACTACTTAGGAGTGGAGATTGCGATTACATCAAGGTCGAAGCAAATTTGTAGTTAGTGGCAGACGAGGTAGTAACACGTAGGAACTTCCcccGAAGTCGGGAATAATTCGCCGAAAGGCGGACTAATACCCGATAGTATCTTCGGATTAAAGCAGCAATGTGCTTCGGGAAAGGCCTGCGGGCTATCAGCTAGTTGGTGAGGTAATAGCTCACCAAGGCGACGACGGCTAGGGGACCTGAGAGGGTGACCcccACCGATGGGACTGAGATACGGCCCATACACCTACGGGTGGCTGCAGACGAGAATATTCGACAATGGACGAAAGTCTGATCGAGCGACGCCGCGTGAAGGATGAA…
OTU_230	0	0	0	0	0	0	0	0	0	0	0	0	0	0	0	0	0	0	0	0	0	0	0	0	0	0	0	0	0	0	Bacteria	1	Planctomycetes	0.45	Planctomycetacia	0.45	Planctomycetales	0.45	Planctomycetaceae	0.45	Singulisphaera	0.38			AACGAACGTTGGCGGCGTGGATGAGGCATGCAAGTCGAACGTGAAAGCCGCAAGGCGAGTAAAGTGGCGGACGGGCGAGTAACACGTAATCAAGCTGCCTGCGAGACGGGAATAACCTCGGGAAACCGAGGCTAAGACCCGATGGTCTCCCTGGACCGCATGGTCCTAGGAGTAAATGGACGGGATCCTTCGGGACCGCCTGCTCGCAGAGGTGATTGCGGCCCATCAGCTAGTTGGTAGGGTAACGGCCTACCAAGGCAACGACGGGTAGCCGGCCTTAGAGGGTGGTCGGCCGCACTGGGACTGAGACACTGCCCAGACTCCTACGGGAGGCTGCAGTCGAGAATCTTCCGCAATGGGCGAAAGCCTGACGGAGCGACGCCGCGTGGAGGATGAAGG…
OTU_231	0	0	0	0	0	0	0	0	0	0	0	0	0	0	0	0	0	0	0	0	0	0	0	0	0	0	0	0	0	0	Bacteria	0.93	Planctomycetes	0.31	Planctomycetacia	0.25	Planctomycetales	0.25	Planctomycetaceae	0.25	Schlesneria	0.05			AACGAACGCTGGCGGCGTGGCTAAGGCATGCAAGTCGAACGAACATATTCCAAGGGTAACTGAGGGATATGTTAGTGGCGAACGGGTGAGGAATACATGGACAACGTACCCTGGACACGGGGATAGCGGCGGGCCGCAAGGCTCTTTAGCGAAAGTGCCGGTAATACCCGATGATCCCGCGGAATCGCATGGTTCTGCGGGCAAAGCTCCGACGGTCTAGGATCGGTTCATGCCCTATCAGCTAGTTGGTGAGGTAACGGCTCACCAAGGCAACGACGGGTACCGGGCGTGAGAGCGTGACCCGGCACATCGGAACTGAGATACGGTCCGGACACCTACGGGTGGCTGCAGCAACGAATATTCCGCAATGGACGCAAGTCTGACGGAGCGACGCCGCGT…
OTU_232	0	0	0	0	0	0	0	0	0	0	0	0	0	0	0	0	0	0	0	0	0	0	0	0	0	0	0	0	0	0	Bacteria	1	Bacteroidetes	1	Bacteroidetes_incertae_sedis	0.92					Ohtaekwangia	0.92			GATGAACGCTAGCGGCAGGCCTAATACATGCAAGTCGAACGGCAAGTGGTGTAGCAATACATTACCTAGAGTGACGTAAGGGTGCGTAACAAGTATGCAATCTGCCCTCAACTGGAGAATAGCTCCCCGAAAGGGGAATTAACACTCCGTAAGATTGTGGTTCGGCATCGAACAGCAATTAAAACTCCGGTGGTTGAGGATGAGCATGCTTCTGATTAGCTAGTTGGTAGTGTAACGGACTACCAAGGCGATGATCAGTAGGGGAACTGAGAGGTTGATCCcccACACTGGCACTGAGATACGGGCCAGACTCCTACGGGAGGCAGCAGTAGGGAATATTGGTCAATGGATGCAAGTCTGAACCAGCCATGCCGCGTGCAGGAAGAAGGCCTTCTGGGT…
OTU_233	0	0	0	0	0	0	0	0	0	0	0	0	0	0	0	0	0	0	0	0	0	0	0	0	0	0	0	0	0	0	Bacteria	1	Proteobacteria	1	Gammaproteobacteria	1	Chromatiales	0.69	Ectothiorhodospiraceae	0.69	Ectothiorhodosinus	0.56			ATTGAACGTTGGCGGCAGGCCTAAAACATGCAAGTCGAACGGTAACAGCGGAAGCTTGCTTCCGGCTGACGAGTGGCGGACGGGTGAGTAACACGTAGGAATCTACCTAATAGTGGgggACAACCCGGGGAAACCCGGGCTAATACCGCATACGCTCTACGGAGGAAAGCAGGGGATCTTCGGACCTTGCGCTATTGGAGGAGCCTGCGTCGGATTAGCTAGTTGGTGGGGTAAAGGCCTACCAAGGCGACGATCCGTAGCTGGTCTGAGAGGACGATCAGCCACACTGGAACTGAGACACGGTCCAGACTCCTACGGGAGGCAGCAGTTAGGAATCTTGGGCAATGGGCGCAAGCCTGACCCAGCCATGCCGCGTgtgtgAAGAAGGCCTTCGGGTTG…
OTU_234	0	0	0	0	0	0	0	0	0	0	0	0	0	0	0	0	0	0	0	0	0	0	0	0	0	0	0	0	0	0	Bacteria	1	Bacteroidetes	1	Sphingobacteria	1	Sphingobacteriales	1	Chitinophagaceae	1	Niabella	0.58			GATGAACGCTAGCGGCAGGCTTAATACATGCAAGTCGAGGGGCAGCACGGGTAGCAATACCTGGTGGCGACCGGCAAACGGGTGCGGAACACGTACACAACCTTCCTTAAGGTGGgggATAGCCCAGAGAAATTTGGATTAATACCTCATAGAATATTGGAGTTGCATGACTTTGATATTAAAGATTTATCGCCATAAGATGGGTGTGCGTATGATTAGGTAGTTGGTTGAGGTAACGGCTCACCAAGCCTTCGATCATTAACTGGTGTGAGAGCACGACCAGTCACACGGGCACTGAGACACGGGCCCGACTCCTACGGGAGGCAGCAGTAAGGAATATTGGTCAATGGACGCAAGTCTGAACCAGCCATGCCGCGTGAAGGATGACTGCCCTCTGGG…
OTU_235	0	0	0	0	0	0	0	0	0	0	0	0	0	0	0	0	0	0	0	0	0	0	0	0	0	0	0	0	0	0	Bacteria	1	Planctomycetes	1	Planctomycetacia	1	Planctomycetales	1	Planctomycetaceae	1	Schlesneria	0.53			AATGAACGTTGGCGGCGTGGATTAGGCATGCAAGTCGAGCGCGAACCCCGCAAGGggggAGAGCGGCAAACGGGGTAGTAACGGGTAGGCGACGTACCCTTCGGTCGGGGATAGCCACGGGAAACTGTGGGTAATACCCGATAATCTCCCGGGACGTGATGGTTCCGGGAGCAAAGGTGTGATTCCACCGGAGGCGCGGCCTGCTTCGTATTAGCTTGTTGGTAGGGTAACGGCCTACCAAGGCGACGATGCGTCGGgggTGTGAGAGCATGACCcccACCACTGGGACTGAGATACTGCCCAGACACCTACGGGTGGCTGCAGTCGAGAATCTTCGGCAATGGGCGCAAGCCTGACCGAGCGACGCCGCGTGTGGGATGAAGGCCCTTGGGTTGTAAA…
OTU_236	0	0	0	0	0	0	0	0	0	0	0	0	0	0	0	0	0	0	0	0	0	0	0	0	0	0	0	0	0	0	Bacteria	1	Actinobacteria	1	Actinobacteria	1	Solirubrobacterales	1	Solirubrobacteraceae	0.98	Solirubrobacter	0.98			GACGAACGCTGGCGGCGTGCTTAACACATGCAAGTGGAGCGACGAACCGGGGCTTGCCCCGGGGCAGAGCCGCGAACGGGTGAGTAACACGTGGGTAACCTACCCCGATGACCGGGACAACCCGAGGAAACTCGGGCTAATACCGGATGTTCtctctTCTCGTAAGGGAAGTGAGCAAAGATAGCTTCGGCCTTCGCATCGGGACGGGCCCGCGGCCCATTAGCTTGTTGGTGGGGTAATGGCCTACCAAGGCTTCGATGGGTAGCTGGTCTGAGAGGACGATCAGCCACACTGGGACTGAGACACGGCCCAGACTCCTACGGGAGGCAGCAGTGGGGAATCTTGCGCAATGCGCGAAAGCGTGACGCAGCAACGCCGCGTGGgggAAGAAGGCCTTCG…
OTU_237	0	0	0	0	0	0	0	0	0	0	0	0	0	0	0	0	0	0	0	0	0	0	0	0	0	0	0	0	0	0	Bacteria	1	Verrucomicrobia	1	Spartobacteria	1					Spartobacteria_genera_incertae_s	1			AACGAACGCTGGCGGCGTGGATAAGACATGCAAGTCGAACGGGATATTATTTGTAGCAATACACGTAATGTCTAGTGGCGTAAGGGTGCGTAACACGTGGGGAATCTGCCGAGAAGTGGgggATAGCTCGTCGAAAGGCGAATTAATACCGCATGTGGTTAGTGAAGACATCTTCACGATACCAAAGCCGGGGCAACCTGGCGCTTCTTGATGACCCCGCGGCCTATCAGCTAGTTGGTGAGGTAACGGCTCACCAAGGCTATGACGGGTAGCTGGTCTGAGAGGACGACCAGCCACACTGGAACTGAGACACGGTCCAGACACCTACGGGTGGCAGCAGTCGAGAATTtttCTCAATGGgggAAACCCTGAAGGAGCGACGCCGCGTGGAGGATGAAG…
OTU_238	0	0	0	0	0	0	0	0	0	0	0	0	0	0	0	0	0	0	0	0	0	0	0	0	0	0	0	0	0	0	Bacteria	1	Chlorobi	0.24	Ignavibacteria	0.14	Ignavibacteriales	0.14	Ignavibacteriaceae	0.14	Ignavibacterium	0.14			GACGAACGCTGGCGGCGTGCTTAATACATGCAAGTCAACTTGTCTTAAGGTAGCAATATCTTAAGAAGAGTGGCGCACGGGTGCGTAACGCGTAGGTAATCTGCCTTTGGGTCTGCCATAATCCAGCGAAAGCTGGACTAATATCAGATGATGCAGCGGCACCACATGGTGACAGTTGTTAAAGTTTTAACGCCCAAAGATGAGCCTGCGTCCCATTAGGTAGTTGGTAGAGTAATAGCCTACCAAGCCAACGATGGGTAGCTGGTCTGAGAGGACGATCAGCCACACTGGAACTGAGACACGGTCCAGACTCCTACGGGAGGCAGCAGTAAGGAATATTGCTCAATGGCCGAAAGGCTGAAGCAGCAACGCCGCGTGAGGGATGAAGGGCTTTTGCTC…
OTU_240	0	0	0	0	0	0	0	0	0	0	0	0	0	0	0	0	0	0	0	0	0	0	0	0	0	0	0	0	0	0	Bacteria	1	Planctomycetes	1	Planctomycetacia	1	Planctomycetales	1	Planctomycetaceae	1	Planctomyces	1			AATGAACGTTGGCGGCGTGGATTAGGCATGCAAGTCGAGCGAGAAGTCTCCCTTCGGGGAGGCGGACAGCGGCAAACGGGGTAGTAAGGCGTAGGTGACGTACCCTAAGGTCTGGGATAGCCGCGGGAAACTGCGATTAATACCGGATAACCTCACAGTCCATGATCGGACAGTGAGCAAAGGTGTGATTCCGCCATAGGAGCGGCCTGCGTGGTATTAGGTAGTTGGTGAGGTAATGGCTCACCAAGCCTGAGATGCCTAGGgggTGTGAGAGCACGACCcccACCACTGGGACTGAGACACTGCCCAGACACCTACGGGTGGCTGCAGTCGAGAATCTTCGGCAATGGGCGAAAGCCTGACCGAGCGACGCCGCGTGCGGGATGAAGGCCTTTGGGT…
OTU_241	0	0	0	0	0	0	0	0	0	0	0	0	0	0	0	0	0	0	0	0	0	0	0	0	0	0	0	0	0	0	Bacteria	1	Proteobacteria	1	Deltaproteobacteria	1	Myxococcales	1	Polyangiaceae	0.94	Chondromyces	0.31			AACGAACGTTAGCGGCgcgcCTAACACATGCAAGTCGAGCGAGAGGGGCTTCGGCCCTGAAAGCGGCGCACGGGTGAGTAACACGTAGGTAATCTCCCCTCGAGTGGTGGACAACTCTTCGAAAGGAGAGCTAATACAGCATAATACCGCACTACTTCGGTGGTGTGGCCAAAGCGGgggATCGTAAGACCTCGCGCTTGAGGATGAGCCTGCGGCCCATCAGCTAGTTGGCGGTGTAAAGGACCACCAAGGCTAAGACGGGTAGCTGGTCTGAGAGGATGAACAGCCACACTGGAACTGAGACACGGTCCAGACTCCTACGGGAGGCAGCAGTGGGGAATCTTGCGCAATGGGCGAAAGCCTGACGCAGCGACGCCGCGTGAGCGATGAAGGCCCTCG…
OTU_242	0	0	0	0	0	0	0	0	0	0	0	0	0	0	0	0	0	0	0	0	0	0	0	0	0	0	0	0	0	0	Bacteria	1	Bacteroidetes	1	Sphingobacteria	1	Sphingobacteriales	1	Sphingobacteriaceae	1	Solitalea	1			GATGAACGCTAGCGGCAGGCCTAATACATGCAAGTCGTACGGGATTGAAGACTTCGGTTTTCATGAGAGTGGCGCACGGGTGCGTAACACGTATGCAACCTACCTTTAACTGGgggATAGCCTTTCGAAAGagagaTTAATACCGCATAAAACAGCAGCACTGCATGGTGTCACTGTTAAAGCTTCGGTGGTTAAAGATGGGCATGCGTTGCATTAGCTAGTTGGTAAGGTAACGGCTTACCAAGGCTACGATGCATAGGGGATCTGAGAGGATGATCCcccACACTGGTACTGAGACACGGACCAGACTCCTACGGGAGGCAGCAGTAAGGAATATTGGTCAATGGGCGCAAGCCTGAACCAGCCATGCCGCGTGCAGGAAGACGGCCCTATGGGTTG…
OTU_243	0	0	0	0	0	0	0	0	0	0	0	0	0	0	0	0	0	0	0	0	0	0	0	0	0	0	0	0	0	0	Bacteria	1	Proteobacteria	1	Gammaproteobacteria	0.96	Xanthomonadales	0.41	Xanthomonadaceae	0.25	Pseudofulvimonas	0.19			ATTGAACGCTGGCGGCATGCCTAACACATGCAAGTCGAACGGCAGCACAGTGCGTAGCAATACGCATGGGTGGCGAGTGGCGGACGGGTGAGGAATGCATCGGAATCTACCCAGTAGCGGgggATAACCTGGGGAAACTCAGGCTAATACCGCATACGACCTATGGGTGAAAGCGGgggACCGTAAGGCCTCGCACTATTGGATGAGCCGATGCCGGATTAGCTAGTTGGTAGGGTAACGGCTTACCAAGGCGACGATCCGTAGCTGGTCTGAGAGGACGATCAGCCACACCGGAACTGAGACACGGTCCGGACTCCTACGGGAGGCAGCAGTGGGGAATATTGGACAATGGgggAAACCCTGATCCAGCAATGCCGCGTgtgtgAAGAAGGCCTGCGG…
OTU_244	0	0	0	0	0	0	0	0	0	0	0	0	0	0	0	0	0	0	0	0	0	0	0	0	0	0	0	0	0	0	Bacteria	1	Bacteroidetes	1	Sphingobacteria	1	Sphingobacteriales	1	Chitinophagaceae	1	Ferruginibacter	0.9			GATGAACGCTAGCGGCAAGCTTAATACATGCAAGTCGAGGGGCAGCATGGGTAGCAATACCTGATGGCGACCGGCAAACGGGTGCGGAACACGTACGCAACCTTCCCAAAACTGGTGAATAGCCTTTCGAAAGagagaTTAATACACCGTAACATAACTAGTAGGCATCTACTTGTTATTATAGTAGCAATACGGTTTTGGATGGGCGTGCGCCTGATTAGATAGTTGGCGGGGTAACGGCCCACCAAGTCTGCGATCAGTAACTGGTGTGAGAGCACGACCAGTCACACGGGCACTGAGACACGGGCCCGACTCCTACGGGAGGCAGCAGTAAGGAATATTGGTCAATGGACGCAAGTCTGAACCAGCTATGCCGCGTGAAGGATGAAGGTCCTCTGG…
OTU_245	0	0	0	0	0	0	0	0	0	0	0	0	0	0	0	0	0	0	0	0	0	0	0	0	0	0	0	0	0	0	Bacteria	1	Proteobacteria	1	Deltaproteobacteria	0.99	Myxococcales	0.99	Kofleriaceae	0.67	Kofleria	0.67			AATGAACGCTGGCGGCgcgcCTAATACATGCAAGTCGAGCGAGAAGACGTAGCAATACGTTTGTAAAGCGGCGGACGGGTGAGTAACACGTAGGTAATCTTCCCTTGAGCGGgggACAACGTTTCGAAAGGAACGCTAATACCGCATACGTTTCTGGAGACTCCGGTCTCTAGAAGGAAAGCTAGGCAGCAATGTCCGGCACTCGAGGAGGAGCCTGCGTCGCATCAGCTAGTTGGTGGGGTAATGGCCTACCAGGGCGAAGACGCGTAGCTGGTCTGAGAGGATGATCAGCCACACTGGGACTGAGACACGGCCCAGACTCCTACGGGAGGCAGCAGTGGGGAATATTGGACAATGGGCGCAAGCCTGATCCAGCCACGCCGCGTGAGTGATGAAGGC…
OTU_246	0	0	0	0	0	0	0	0	0	0	0	0	0	0	0	0	0	0	0	0	0	0	0	0	0	0	0	0	0	0	Bacteria	1	Bacteroidetes	1	Bacteroidetes_incertae_sedis	0.97					Ohtaekwangia	0.97			GATGAACGCTAGCGGCAGGCCTAATACATGCAAGACGAACGGCAAGAGATGTAGCAATACATTTCCTAGAGTGTCGTAAGGGTGCGTAACAAGTATGCAATCTGCCCTGTACTGGAGAATAGCTCCCCGAAAGGGGAATTAACACTCCATAAGATCGTATCCTGGCATCAGGAAGCGATTAAAACTCCGGTGGTACAGGATGAGCATGCTTCTGATTAGCTAGTTGGTGGTGTAATGGACCACCAAGGCGATGATCAGTAGGGGAACTGAGAGGTTGATCCcccACACTGGCACTGAGATACGGGCCAGACTCCTACGGGAGGCAGCAGTAGGGAATATTGGTCAATGGATGCAAGTCTGAACCAGCCATGCCGCGTGCAGGAAGAAGGCCTTCTGGGT…
OTU_247	0	0	0	0	0	0	0	0	0	0	0	0	0	0	0	0	0	0	0	0	0	0	0	0	0	0	0	0	0	0	Bacteria	1	Planctomycetes	0.46	Planctomycetacia	0.46	Planctomycetales	0.46	Planctomycetaceae	0.46	Singulisphaera	0.38			AACGAACGTTGGCGGCGTGGATGAGGCATGCAAGTCGAACGTGAAAGCCGCAAGGTGAGTAGCGTGGCGGACGGGCGAGTAACACGTAATCAAGCTGCCTGCGAGACGGGGATAACCTCGGGAAACCGAGGCTAAGACCCGATGGTCTGCTGGGGACGCATGTTCCTGGTAGTAAATGGGCGGGATCCTTCGGGATCGCCTGCTCGCAGAGGTGATTGCGGCCCATCAGCTAGTTGGTAGGGTAATGGCCTACCAAGGCAACGACGGGTAGCCGGCCTTAGAGGGTGGTCGGCCGCACTGGGACTGAGACACTGCCCAGACTCCTACGGGAGGCTGCAGTCGAGAATCTTCCGCAATGGGCGAAAGCCTGACGGAGCGACGCCGCGTGGAGGACGAAGG…
OTU_248	0	0	0	0	0	0	0	0	0	0	0	0	0	0	0	0	0	0	0	0	0	0	0	0	0	0	0	0	0	0	Bacteria	1	Bacteroidetes	1	Bacteroidetes_incertae_sedis	0.45					Ohtaekwangia	0.45			GATGAACGCTAGCGGCAGGCCTAATACATGCAAGCTGAACGGTAACTTTGGTAGCAATACTGGAGCTAGAGTAGCGTAAGGGTGCGTAACACGTATGCAATCTGCCCACAACAGGAGGATAGCTCACCGAAAGGTGGGATAATACTTCATAGGATCTTAGAGTGGCATCACTTAGAGATTAAACGCTTAGGGTTGTGGATGAGCATGCGCATGATTAGTTAGTTGGCGGGGTAACGGCCCACCAAGACGATGATCATTAGGGGAACTGAGAGGTTGGTCCcccACACTGGCACTGAGATACGGGCCAGACTCCTACGGGAGGCAGCAGTAGGGAATATTGGACAATGGGTGAGAGCCTGATCCAGCCATGCCGCGTGCAGGAAGAAAGCCTTCTGGGTT…
OTU_250	0	0	0	0	0	0	0	0	0	0	0	0	0	0	0	0	0	0	0	0	0	0	0	0	0	0	0	0	0	0	Bacteria	1	Proteobacteria	1	Deltaproteobacteria	1	Myxococcales	1	Phaselicystidaceae	0.4	Phaselicystis	0.4			AACGAACGTTAGCGGCgcgcCTAATACATGCAAGTCGAGCGAGAAAGGGCTTCGGCCCCGGTAAAGCGGCGCACGGGTGAGTAACACGTAGATCATCTGCCCTCGAGTGGTGGACAACCCTCCGAAAGGAGGGCTAATACAGCATAACGTCAGCAATGACCAAAGCGGGCCTCTCCACGGAAGCTCGCGCTTGAGGATGAGTCTGCGGCCCATCAGCTAGTTGGCGGGGTAATAGCCCACCAAGGCAAAGACGGGTAGCTGGTCTGAGAGGATGAACAGCCACACTGGAACTGAGACACGGTCCAGACTCCTACGGGAGGCAGCAGTAGGGAATCTTCCGCAATGGGCGAAAGCCTGACGGAGCGACGCCGCGTGAGCGATGAAGGCCTTCGGGTTGTA…
OTU_43	0	0	0	0	0	0	0	0	0	0	0	0	0	0	0	0	0	0	0	0	0	0	0	0	0	0	0	0	0	0	Bacteria	1	WS3	0.89							WS3_genera_incertae_sedis	0.89			AACGAACGCTGGCGGCGTGGATTAGGCATGCAAGTCGAACGCGAAAGAGGgggTAACTCCTCGAGTAGAGTGGCGAACGGGTGAGTAACGCGTGAGAAACCTGCCTTCAACAGGgggATAACACTCCTAACGGGGTGCTAATACCGCATGAGACCACGGAGTCGCATGGCTCTGAGGTCAAAGGTGGCCTCTATTTATAAGCTACCGGTTGAAGATGGTCTCGCGTCCCATTAGCTAGTTGGCGGTGTAAAAGACCACCAAGGCGACGATGGGTAGCTGGTCTGAGAGGATGGTCAGCCACACTGGGACTGAGATACGGCCCAGACTCCTACGGGAGGCAGCAGTCGAGAGGCTTCGGCAATGGgggAAACCCTGACCGAGCGACGCCGCGTGAGGGAT…
OTU_47	0	0	0	0	0	0	0	0	0	0	0	0	0	0	0	0	0	0	0	0	0	0	0	0	0	0	0	0	0	0	Bacteria	1	Bacteroidetes	1	Sphingobacteria	1	Sphingobacteriales	1	Chitinophagaceae	1	Terrimonas	0.81			GATGAACGCTAGCGGCAGGCTTAATACATGCAAGTCGAGGGGCAGCAGCTTTGTAGCAATACAGAGGCTGGCGACCGGCAAACGGGTGCGGAACACGTACAGAACCTTCCTTCGAGCGGGGAATAGCCCAGAGAAATTTGGATTAATACCCCATAGCATATTGATAAGGCATCTTATTAATATTAAAGATTTATCACTTGAAGATGGCTGTGCGGCTGATTAGGTAGTTGGCGGGGTAACGGCCCACCAAGCCTACGATCAGTAACTGGTGTGAGAGCACGACCAGTCACACGGGCACTGAGACACGGGCCCGACTCCTACGGGAGGCAGCAGTAAGGAATATTGGTCAATGGACGCAAGTCTGAACCAGCCATGCCGCGTGGAGGATGAAGGTCCTCT…
OTU_48	0	0	0	0	0	0	0	0	0	0	0	0	0	0	0	0	0	0	0	0	0	0	0	0	0	0	0	0	0	0	Bacteria	1	Chlorobi	0.42	Ignavibacteria	0.4	Ignavibacteriales	0.4	Ignavibacteriaceae	0.4	Ignavibacterium	0.4			GACGAACGTTGGCGGCGTGCTTAATACATGCAAGTCAACTGAAGCACCGGTAGTAATACTGGTGTGGAGGTGGCGCACGGGTGAGTAACACGTAGGTAATCTGCCTTCAGGTCTGACATAACTCCGAGAAATCGAAGCTAATATCAGATGATGCAGCGGCTTGACATCAAGACAGTTGTTAAAGCTTCGGCGCCTGAAGATGAGCCTGCGTCTGATTAGCTAGTTGGCGGGGTAACGGCCCACCAAGGCCACGATCAGTAGCTGGTCTGAGAGGATGATCAGCCACACTGGAACTGAGACACGGTCCAGACTCCTACGGGAGGCAGCAGTAAGGAATATTGCTCAATGGGAGAAATCCTGAAGCAGCAACGCCGCGTGAAGGATGAAGGGCTTTTGCTT…
OTU_52	0	0	0	0	0	0	0	0	0	0	0	0	0	0	0	0	0	0	0	0	0	0	0	0	0	0	0	0	0	0	Bacteria	1	Bacteroidetes	0.99	Sphingobacteria	0.62	Sphingobacteriales	0.62	Cyclobacteriaceae	0.5	Aquiflexum	0.5			GATGAACGCTAGCGGCAGGCCTAATACATGCAAGCCGAACGGTAATCCCGCCAGCAATGGCGGGACTAGAGTGGCGTAAGGGTGCGTAACACGTATGCAATCTGCCCTGTACAAGAGGATAGCTCCCCGAAAGGGGAATTAATACTCTATAAGATCACGAGAGGGCATCTGATTGTGATTAAAGCTGAGGTGGTACAGGATGAGCATGCGCATGATTAGTTAGTTGGCGGGGTAACGGCCCACCAAGACGATGATCATTAGGGGAACTGAGAGGTTGGTCCcccACACTGGCACTGAGATACGGGCCAGACTCCTACGGGAGGCAGCAGTAGGGAATATTGGACAATGGGTGCGAGCCTGATCCAGCCATGCCGCGTGCAGGAAGACAGCCTTCTGGGT…
OTU_56	0	0	0	0	0	0	0	0	0	0	0	0	0	0	0	0	0	0	0	0	0	0	0	0	0	0	0	0	0	0	Bacteria	1	Bacteroidetes	1	Bacteroidetes_incertae_sedis	1					Ohtaekwangia	1			GATGAACGCTAGCGGCAGGCTTAATACATGCAAGTCGAACGGTAAGTAGTGTAGCAATACATTACCAAGAGTGACGTACGGGTGCGTAACACGTATGCAACCTACCTTGTACAGGAGTATAGCTCGGGGAAACTCGAATTAACCCTCCATAAGATCATAGAGTAGCATTACTTAGTGATTAAAACTCAGGTGGTACAAGATGGGCATGCGTCTGATTAGTTAGTTGGCGGGGTAACGGCCCACCAAGACGATGATCAGTAGGGGAACTGAGAGGTTGATCCcccACACTGGCACTGAGATACGGGCCAGACTCCTACGGGAGGCAGCAGTAGGGAATATTGGTCAATGGATGCAAGTCTGAACCAGCCATGCCGCGTGCAGGAAGAAGGCCTTCTGGGT…
OTU_58	0	0	0	0	0	0	0	0	0	0	0	0	0	0	0	0	0	0	0	0	0	0	0	0	0	0	0	0	0	0	Bacteria	1	Verrucomicrobia	1	Opitutae	1	Opitutales	1	Opitutaceae	1	Opitutus	0.86			AATGAACGCTGGCGGCGTGGTTAAGACATGCAAGTCGAACGGGCTTTTCGGTGTAGCAATACATTGAAAAGTCAGTGGCGAACGGGTGCGTAACACGTGAACAATCTACCACTTAGTGTGGAATAGCTCGCCGAAAGGCGAATTAATACCACATGTGGTTGTTTCCTGCATGGGAGACATACTAAAGCCGGGGACCGCAAGGCCTGGCGCTAAGTGAGGAGTTCGCGGCCTATCAGCTAGTTGGCGAGGTAACGGCTCACCAAGGCTAAGACGGGTAGCTGATCTGAGAGGATGATCAGCCACACTGGAACTGAGACACGGTCCAGACACCTACGGGTGGCAGCAGTTTCGAATCATTCACAATGGGCGAAAGCCTGATGGTGCGACGCCGCGTGAGGG…
OTU_73	0	0	0	0	0	0	0	0	0	0	0	0	0	0	0	0	0	0	0	0	0	0	0	0	0	0	0	0	0	0	Bacteria	1	Acidobacteria	0.21	Holophagae	0.21	Holophagales	0.09	Holophagaceae	0.09	Geothrix	0.08			AACGAACGCTGGCGGCGTGCCTAATACATGCAAGTCGAACGAGAAAGTCCGGCTTCGGTTGGACAAGTAAAGTGGCGAACGGGTGAGTAACACGTGGGCAATTTTCCCTTGAATCTGGGATAACCCTTCGAAAGGAGGCCTAATACCAGATGACACTGTCGAATGGCATCTTTTGACAGTCAAAGGCGGAGCAATCTGTCGTTCAAGGATGAGCCCGCGGCCCATTAGCTAGTTGGCGGGGTAATGGCCCACCAAGGCAACGATGGGTAGCCGACCTGAGAGGGTGACCGGCCACACTGGGACTGAGATACGGCCCAGACTCCTACGGGAGGCAGCAGTAGGGAATATTGCGCAATGGACGAAAGTCTGACGCAGCAACGCCGCGTGGGTGATGAAGCA…
OTU_88	0	0	0	0	0	0	0	0	0	0	0	0	0	0	0	0	0	0	0	0	0	0	0	0	0	0	0	0	0	0	Bacteria	1	Acidobacteria	0.99	Acidobacteria_Gp6	0.99					Gp6	0.99			AATCAACGCTGGCGGCGTGCCTAACACATGCAAGTCGAACGCGACTGGGGCTTCGGCTCCAGTTGAGTGGCGAACGGGTGAGTAACACGTGGGTGACCTACCTTCGAATGGgggATAACGTCCCGAAAGGGACGCTAATACCGCATAACATCCCGCTCTTGAATGGggggAGATCAAAGCCGGGGATCGCAAGACCTGGCGTTTGGAGAGGGACCCGCGTCCGATTAGCTAGTTGGTGAGGTAACGGCCCACCAAGGCGACGATCGGTAGCCGGCCTGAGAGGGCGGACGGCCACACTGGGACTGAGACACGGCCCAGACTCCTACGGGAGGCAGCAGTGGGGAATTGTTCGCAATGGGCGCAAGCCTGACGACGCAACGCCGCGTGGAGGATGAAGGT…
OTU_89	0	0	0	0	0	0	0	0	0	0	0	0	0	0	0	0	0	0	0	0	0	0	0	0	0	0	0	0	0	0	Bacteria	1	Acidobacteria	1	Acidobacteria_Gp17	1					Gp17	1			AATCAACGCTGGCGGCGTGCCTAACACATGCAAGTTGAGCGCTTGAGGggggCAACCcccAAGagagCAGCGAACGGGTGAGTAACGCGTGGGTGATCTTCCTTCGAGTGGGGAACAACATCGGGAAACTGGTGCTAATTCCGCATAATACCCTGGGGCTACGAGCCTCAGGATCAAAGCCGGGGACCGCAAGGCCTGGCGCTTGAAGATGAGCCCGCGTCCGATTAGCTAGTTGGCGGGGTAATGGCCCACCAAGGCTTCGATCGGTAGCCGGCCTGAGAGGGCGGACGGCCACACTGGAACTGAGACACGGTCCAGACTCCTACGGGAGGCAGCAGTGGGGAATTtttCGCAATGGGCGCAAGCCTGACGAAGCAACGCCGCGTGGAGGATGAAGGT…
OTU_97	0	0	0	0	0	0	0	0	0	0	0	0	0	0	0	0	0	0	0	0	0	0	0	0	0	0	0	0	0	0	Bacteria	1	Bacteroidetes	1	Bacteroidetes_incertae_sedis	0.46					Ohtaekwangia	0.46			GATGAACGCTAGCGGCAGGCCTAATACATGCAAGCTGAACGGCAAGATTGGTAGCAATACTGATCCTAGAGTAGCGTAAGGGTGCGTAACACGTATGCAATCTACCCGCAACAGGAGGATAGCTCTCCGAAAGGGGAATTAAGACTCCATAATATCATTTGAGGGCATCTGAAGATGATTAAACTACAAGGGGTTGTGGATGAGCATGCGTCTGATTAGTTAGTTGGCGGGGTAACGGCCCACCAAGACAATGATCAGTAGGGGAACTGAGAGGTTGGTCCcccACACTGGCACTGAGATACGGGCCAGACTCCTACGGGAGGCAGCAGTAGGGAATATTGGACAATGGGTGCAAGCCTGATCCAGCCATGCCGCGTGCAGGAAGAAAGCCTTCTGGGT…
